# Supplementary material for: Diosmium compounds containing bis(imidazole)-p-quinone bridging ligands
Source: Royal Society of Chemistry journal article supplement (doi:10.1039/d2dt00184e), 2022-01-01
Supplement: d2dt00184e1.pdf [file d2dt00184e1.pdf]

## **Supporting Information**

### **Diosmium compounds bridged by bis(imidazole)-*p*-quinone ligands**

Suman Dhara, Mohd. Asif Ansari, Brigitte Schwederski, Vasileios Filippou, Wolfgang Kaim\*  
and Goutam KumarLahiri\*

**Table S1** Selected crystallographic parameters

|                                                                                      | [1](ClO <sub>4</sub> ) <sub>2</sub> •CH <sub>2</sub> Cl <sub>2</sub>                            | [2](ClO <sub>4</sub> ) <sub>2</sub> •CH <sub>2</sub> Cl <sub>2</sub>                            | [3](ClO <sub>4</sub> ) <sub>2</sub>                                |
|--------------------------------------------------------------------------------------|-------------------------------------------------------------------------------------------------|-------------------------------------------------------------------------------------------------|--------------------------------------------------------------------|
| empirical formula                                                                    | C <sub>59</sub> H <sub>42</sub> Cl <sub>4</sub> N <sub>14</sub> O <sub>10</sub> Os <sub>2</sub> | C <sub>59</sub> H <sub>42</sub> Cl <sub>4</sub> N <sub>14</sub> O <sub>10</sub> Os <sub>2</sub> | C <sub>31</sub> H <sub>23</sub> ClN <sub>6</sub> O <sub>5</sub> Os |
| formula weight                                                                       | 1629.26                                                                                         | 1629.26                                                                                         | 785.20                                                             |
| crystal system                                                                       | triclinic                                                                                       | monoclinic                                                                                      | triclinic                                                          |
| space group                                                                          | <i>P</i> $\bar{1}$                                                                              | P2 <sub>1</sub> /c                                                                              | <i>P</i> $\bar{1}$                                                 |
| <i>a</i> (Å)                                                                         | 12.1356(2)                                                                                      | 10.48690(10)                                                                                    | 9.43780(10)                                                        |
| <i>b</i> (Å)                                                                         | 14.8336(4)                                                                                      | 18.5944(2)                                                                                      | 12.8016(2)                                                         |
| <i>c</i> (Å)                                                                         | 17.2502(4)                                                                                      | 33.9047(4)                                                                                      | 13.6171(3)                                                         |
| $\alpha$ (deg)                                                                       | 75.546(2)                                                                                       | 90                                                                                              | 101.594(2)                                                         |
| $\beta$ (deg)                                                                        | 89.585(2)                                                                                       | 93.9530(10)                                                                                     | 106.424(2)                                                         |
| $\gamma$ (deg)                                                                       | 88.763(2)                                                                                       | 90                                                                                              | 94.7480(10)                                                        |
| <i>V</i> (Å <sup>3</sup> )                                                           | 3006.30(12)                                                                                     | 6595.61(12)                                                                                     | 1528.72(5)                                                         |
| <i>Z</i>                                                                             | 2                                                                                               | 4                                                                                               | 2                                                                  |
| $\mu$ (mm <sup>-1</sup> )                                                            | 4.472                                                                                           | 4.076                                                                                           | 4.308                                                              |
| $\rho_{\text{calcd}}$ (g cm <sup>-3</sup> )                                          | 1.800                                                                                           | 1.641                                                                                           | 1.706                                                              |
| Temperature (K)                                                                      | 150(2)                                                                                          | 150(2)                                                                                          | 150(2)                                                             |
| <i>F</i> (000)                                                                       | 1588.0                                                                                          | 3176.0                                                                                          | 768.0                                                              |
| $\theta$ range (deg)                                                                 | 1.687 to 25                                                                                     | 1.628 to 24.999                                                                                 | 1.604 to 25                                                        |
| data/restraints/parameters                                                           | 10553/54/802                                                                                    | 11607/0/802                                                                                     | 5381/0/39                                                          |
| <i>R</i> <sub>1</sub> , <i>wR</i> <sub>2</sub> [ <i>I</i> > 2 $\sigma$ ( <i>I</i> )] | 0.0414, 0.0983                                                                                  | 0.0378, 0.0949                                                                                  | 0.0218, 0.0531                                                     |
| <i>R</i> <sub>1</sub> , <i>wR</i> <sub>2</sub> (all data)                            | 0.0529, 0.1047                                                                                  | 0.0430, 0.0976                                                                                  | 0.0241, 0.0541                                                     |
| <i>GOF</i> on <i>F</i> <sup>2</sup>                                                  | 1.028                                                                                           | 1.071                                                                                           | 1.044                                                              |
| largest difference in peak and hole (e Å <sup>-3</sup> )                             | 1.6, -1.95                                                                                      | 1.39, -1.21                                                                                     | 0.92, -0.71                                                        |

**Table S2** Selected experimental and calculated bond lengths (Å)

| bond      | [1 <sup>2+</sup> ] |                    | [2 <sup>2+</sup> ] |                    |
|-----------|--------------------|--------------------|--------------------|--------------------|
|           | X-ray              | DFT ( <i>S</i> =0) | X-ray              | DFT ( <i>S</i> =0) |
| Os1-N1    | 2.095(5)           | 2.124              | 2.078(4)           | 2.130              |
| Os1-N2    | 2.090(5)           | 2.134              | 2.087(4)           | 2.130              |
| Os1-N7    | 2.049(5)           | 2.085              | 2.045(5)           | 2.075              |
| Os1-N8    | 2.041(5)           | 2.083              | 2.032(5)           | 2.068              |
| Os1-N9    | 2.043(5)           | 2.084              | 2.043(5)           | 2.088              |
| Os1-N10   | 2.052(6)           | 2.083              | 2.064(5)           | 2.099              |
| Os2-N4    | 2.072(5)           | 2.124              | 2.085(4)           | 2.135              |
| Os2-N5    | 2.083(5)           | 2.134              | 2.073(5)           | 2.126              |
| Os2-N11   | 2.043(6)           | 2.082              | 2.035(5)           | 2.074              |
| Os2-N12   | 2.054(5)           | 2.084              | 2.049(5)           | 2.083              |
| Os2-N13   | 2.046(5)           | 2.085              | 2.051(5)           | 2.079              |
| Os2-N14   | 2.059(6)           | 2.084              | 2.055(5)           | 2.095              |
| C1-O1     | 1.223(7)           | 1.228              | 1.220(6)           | 1.237              |
| C1-C2     | 1.464(9)           | 1.474              | 1.483(7)           | 1.483              |
| C2-N1     | 1.375(8)           | 1.370              | 1.370(7)           | 1.379              |
| C2-C3     | 1.406(9)           | 1.414              | 1.398(7)           | 1.416              |
| C3-N3     | 1.356(8)           | 1.352              | 1.370(7)           | 1.346              |
| C3-C4     | 1.465(9)           | 1.483              | 1.458(8)           | 1.481              |
| C4-O2     | 1.233(7)           | 1.228              | 1.234(7)           | 1.219              |
| C4-C5     | 1.460(9)           | 1.475              | 1.462(8)           | 1.479              |
| C5-N4     | 1.369(8)           | 1.370              |                    |                    |
| C5-N6     |                    |                    | 1.363(7)           | 1.346              |
| C5-C6     | 1.399(9)           | 1.414              | 1.409(8)           | 1.416              |
| C6-C1     | 1.464(9)           | 1.482              | 1.462(8)           | 1.482              |
| C6-N6     | 1.366(8)           | 1.351              |                    |                    |
| C6-N4     |                    |                    | 1.374(7)           | 1.378              |
| C7-N1     | 1.372(8)           | 1.373              | 1.379(7)           | 1.374              |
| C7-N3     | 1.339(8)           | 1.337              | 1.331(7)           | 1.335              |
| Os1---Os2 | 9.347              | 9.457              | 7.586              | 7.811              |

**Table S3** Selected experimental and calculated bond angles (deg)

| bond (deg)  | [1 <sup>2+</sup> ] |                    | [2 <sup>2+</sup> ] |                    |
|-------------|--------------------|--------------------|--------------------|--------------------|
|             | X-ray              | DFT ( <i>S</i> =0) | X-ray              | DFT ( <i>S</i> =0) |
| N1-Os1-N2   | 78.4(2)            | 76.971             | 78.34(17)          | 77.393             |
| N1-Os1-N7   | 94.1(2)            | 88.582             | 99.15(17)          | 101.668            |
| N1-Os1-N8   | 99.04(19)          | 101.495            | 93.64(17)          | 93.461             |
| N1-Os1-N9   | 169.1(2)           | 169.306            | 168.67(18)         | 166.223            |
| N1-Os1-N10  | 93.8(2)            | 95.352             | 92.88(18)          | 91.710             |
| N2-Os1-N7   | 97.5(2)            | 98.232             | 175.70(18)         | 176.076            |
| N2-Os1-N8   | 175.4(2)           | 175.372            | 97.93(18)          | 98.583             |
| N2-Os1-N9   | 93.3(2)            | 94.522             | 93.79(18)          | 93.220             |
| N2-Os1-N10  | 86.8(2)            | 85.222             | 86.64(18)          | 84.865             |
| N7-Os1-N8   | 78.8(2)            | 77.310             | 78.67(19)          | 77.630             |
| N7-Os1-N9   | 94.1(2)            | 99.164             | 89.17(18)          | 88.357             |
| N7-Os1-N10  | 171.6(2)           | 175.280            | 97.01(19)          | 98.992             |
| N8-Os1-N9   | 89.7(2)            | 87.476             | 95.5(2)            | 97.948             |
| N8-Os1-N10  | 97.2(2)            | 99.299             | 172.68(19)         | 174.308            |
| N9-Os1-N10  | 78.5(2)            | 77.283             | 78.4(2)            | 77.264             |
| N4-Os2-N5   | 78.0(2)            | 77.097             | 78.00(18)          | 77.109             |
| N4-Os2-N11  | 88.5(2)            | 89.931             | 97.44(18)          | 97.461             |
| N4-Os2-N12  | 102.6(2)           | 101.193            | 172.52(18)         | 170.327            |
| N4-Os2-N13  | 171.9(2)           | 168.623            | 103.48(17)         | 96.948             |
| N4-Os2-N14  | 96.3(2)            | 94.436             | 85.49(19)          | 84.680             |
| N5-Os2-N11  | 97.9(2)            | 97.786             | 91.62(19)          | 92.123             |
| N5-Os2-N12  | 175.7(2)           | 174.960            | 95.51(19)          | 94.629             |
| N5-Os2-N13  | 96.1(2)            | 94.311             | 172.6(2)           | 167.976            |
| N5-Os2-N14  | 85.1(2)            | 86.326             | 94.8(2)            | 91.417             |
| N11-Os2-N12 | 77.9(2)            | 77.409             | 78.86(18)          | 77.609             |
| N11-Os2-N13 | 98.0(2)            | 98.711             | 95.37(19)          | 99.064             |
| N11-Os2-N14 | 174.9(2)           | 174.586            | 173.4(2)           | 176.199            |
| N12-Os2-N13 | 83.7(2)            | 87.977             | 83.43(18)          | 92.080             |
| N12-Os2-N14 | 99.0(2)            | 98.565             | 98.88(19)          | 100.724            |
| N13-Os2-N14 | 77.5(2)            | 77.392             | 78.2(2)            | 77.518             |

**Table S4** Selected experimental and calculated bond lengths (Å)

| bond       | [3 <sup>2+</sup> ] |                    |
|------------|--------------------|--------------------|
|            | X-ray              | DFT ( <i>S</i> =0) |
| Os1-O1     | 2.093(2)           | 2.149              |
| Os1-N1     | 2.150(3)           | 2.167              |
| Os1-N3     | 2.057(3)           | 2.078              |
| Os1-N4     | 2.031(3)           | 2.058              |
| Os1-N5     | 2.059(3)           | 2.084              |
| Os1-N6     | 2.032(3)           | 2.069              |
| C1-O1      | 1.274(4)           | 1.273              |
| C1-C2      | 1.431(5)           | 1.433              |
| C2-N1      | 1.363(4)           | 1.364              |
| C2-C3      | 1.379(5)           | 1.399              |
| C3-N2      | 1.363(4)           | 1.353              |
| C4-N2      | 1.351(5)           | 1.352              |
| C4-N1      | 1.382(4)           | 1.382              |
| C4-C5      | 1.469(5)           | 1.470              |
| C5-C6      | 1.389(5)           | 1.400              |
| C6-C7      | 1.390(6)           | 1.395              |
| C7-C8      | 1.380(7)           | 1.400              |
| C8-C11     | 1.524(6)           | 1.509              |
| C8-C9      | 1.391(7)           | 1.405              |
| C9-C10     | 1.376(7)           | 1.390              |
| C10-C5     | 1.394(6)           | 1.407              |
| Os1---Os1' | 7.938              | 8.042              |

**Table S5** Selected experimental and calculated bond angles (deg)

| [3 <sup>2+</sup> ] |            |                    |
|--------------------|------------|--------------------|
| bond (deg)         | X-ray      | DFT ( <i>S</i> =0) |
| N1-Os1-O1          | 79.64(10)  | 78.554             |
| N1-Os1-N3          | 84.98(11)  | 85.368             |
| N1-Os1-N4          | 104.45(11) | 100.899            |
| N1-Os1-N5          | 164.42(11) | 167.335            |
| N1-Os1-N6          | 96.57(11)  | 97.047             |
| O1-Os1-N3          | 95.36(11)  | 96.137             |
| O1-Os1-N4          | 172.17(10) | 173.692            |
| O1-Os1-N5          | 85.36(10)  | 87.344             |
| O1-Os1-N6          | 88.33(11)  | 89.655             |
| N3-Os1-N4          | 78.53(12)  | 77.558             |
| N3-Os1-N5          | 100.71(12) | 100.638            |
| N3-Os1-N6          | 176.21(11) | 176.113            |
| N4-Os1-N5          | 90.94(11)  | 91.328             |
| N4-Os1-N6          | 97.72(12)  | 98.953             |
| N5-Os1-N6          | 78.68(12)  | 77.601             |

**Table S6** Intermolecular interactions (Å)

|                                     |           | CH--- $\pi$ |           | $\pi$ --- $\pi$ |
|-------------------------------------|-----------|-------------|-----------|-----------------|
| [1](ClO <sub>4</sub> ) <sub>2</sub> | C47---H10 | 2.863       | C9---C45  | 3.516           |
|                                     | C45---H9  | 2.752       | C4---C10  | 3.445           |
|                                     | C31---H45 | 2.758       | C3---C4   | 3.447           |
|                                     | C30---H42 | 2.797       | C2---C12  | 3.591           |
| [2](ClO <sub>4</sub> ) <sub>2</sub> | C54---H11 | 2.896       | C11---C2  | 3.495           |
|                                     | C55---H11 | 2.885       | C11---C3  | 3.565           |
|                                     |           |             | C11---C1  | 3.458           |
|                                     |           |             | C11---C6  | 3.590           |
|                                     |           |             | C11---C55 | 3.502           |
|                                     |           |             | C12---C4  | 3.598           |
|                                     |           |             | C12---C2  | 3.564           |
| [3](ClO <sub>4</sub> ) <sub>2</sub> | C15---H9  | 2.875       | C8---C10  | 3.461           |
|                                     |           |             | C9---C9   | 3.377           |
|                                     |           |             | C17---C19 | 3.542           |
|                                     |           |             | C18---C20 | 3.478           |

**Table S7** Energies of DFT (M06L/lanL2DZ/6-31G\*\*) optimized structures

| Complex            | <i>E</i> (Hartrees) |                |              |                |                | <i>E</i> <sub>(HE-LE)<sup>a</sup></sub>                                |
|--------------------|---------------------|----------------|--------------|----------------|----------------|------------------------------------------------------------------------|
|                    | <i>S</i> = 0        | <i>S</i> = 1/2 | <i>S</i> = 1 | <i>S</i> = 3/2 | <i>S</i> = 2   |                                                                        |
| [1 <sup>3+</sup> ] |                     | -3332.6959     |              |                |                |                                                                        |
| [1 <sup>2+</sup> ] | -3333.0397          |                |              |                |                |                                                                        |
| [1 <sup>+</sup> ]  |                     | -333.2450      |              |                |                |                                                                        |
| [1]                | -333.3662           |                | -3333.3719   |                |                | 0.0057 Hartrees<br>14.97 KJ mol <sup>-1</sup><br>1258 cm <sup>-1</sup> |
| [1 <sup>-</sup> ]  |                     | -3333.4117     |              | -3330.4101     |                | 0.0016 Hartrees<br>4.20 KJ mol <sup>-1</sup><br>351 cm <sup>-1</sup>   |
| [1 <sup>2-</sup> ] | -3333.3722          |                | -3333.3654   |                | -<br>3333.3693 | 0.0068 Hartrees<br>17.85 KJ mol <sup>-1</sup><br>1492 cm <sup>-1</sup> |
| [2 <sup>3+</sup> ] |                     | -333.6617      |              |                |                |                                                                        |
| [2 <sup>2+</sup> ] | -3333.0175          |                |              |                |                |                                                                        |
| [2 <sup>+</sup> ]  |                     | -3333.2363     |              |                |                |                                                                        |
| [2]                | -3333.3710          |                | -3333.3688   |                |                | 0.0023 Hartrees<br>6.039 KJ mol <sup>-1</sup><br>505 cm <sup>-1</sup>  |
| [2 <sup>-</sup> ]  | -3333.4162          |                |              | -3333.3629     |                | 0.0533 Hartrees<br>139 KJ mol <sup>-1</sup><br>11698 cm <sup>-1</sup>  |
| [2 <sup>2-</sup> ] | -333.3745           |                | -3333.3726   |                | -<br>3333.3706 | 0.0039 Hartrees<br>10.24 KJ mol <sup>-1</sup><br>856 cm <sup>-1</sup>  |
| [3 <sup>4+</sup> ] | -3378.7383          |                | -3378.7590   |                |                | 0.0206 Hartrees<br>54.08 KJ mol <sup>-1</sup><br>4521 cm <sup>-1</sup> |
| [3 <sup>3+</sup> ] |                     | -3379.1962     |              |                |                |                                                                        |
| [3 <sup>2+</sup> ] | -3379.5543          |                |              |                |                |                                                                        |
| [3 <sup>+</sup> ]  |                     | -3379.7677     |              |                |                |                                                                        |
| [3]                | -3379.8970          |                | -3379.8946   |                |                | 0.0024 Hartrees<br>6.30 KJ mol <sup>-1</sup><br>527 cm <sup>-1</sup>   |
| [3 <sup>-</sup> ]  |                     | -3379.9440     |              | -3379.9401     |                | 0.039 Hartrees<br>10.24 KJ mol <sup>-1</sup><br>855 cm <sup>-1</sup>   |
| [3 <sup>2-</sup> ] | -3379.9064          |                | -3379.9059   |                | -<br>3379.9025 | 0.0039 Hartrees<br>10.24 KJ mol <sup>-1</sup><br>856 cm <sup>-1</sup>  |



**Table S8** Selected DFT calculated bond lengths (Å) for [1<sup>n</sup>]

| bond    | DFT                           |                             |                              |              |                              |                             |
|---------|-------------------------------|-----------------------------|------------------------------|--------------|------------------------------|-----------------------------|
|         | [1 <sup>3+</sup> ]<br>(S=1/2) | [1 <sup>2+</sup> ]<br>(S=0) | [1 <sup>+</sup> ]<br>(S=1/2) | [1]<br>(S=1) | [1 <sup>-</sup> ]<br>(S=1/2) | [1 <sup>2-</sup> ]<br>(S=0) |
| Os1-N1  | 2.100                         | 2.124                       | 2.109                        | 2.110        | 2.109                        | 2.125                       |
| Os1-N2  | 2.126                         | 2.134                       | 2.127                        | 2.120        | 2.113                        | 2.107                       |
| Os1-N7  | 2.082                         | 2.085                       | 2.064                        | 2.058        | 2.057                        | 2.049                       |
| Os1-N8  | 2.084                         | 2.083                       | 2.065                        | 2.059        | 2.063                        | 2.060                       |
| Os1-N9  | 2.092                         | 2.084                       | 2.076                        | 2.076        | 2.078                        | 2.064                       |
| Os1-N10 | 2.095                         | 2.083                       | 2.086                        | 2.086        | 2.089                        | 2.072                       |
| Os2-N4  | 2.099                         | 2.124                       | 2.107                        | 2.109        | 2.108                        | 2.126                       |
| Os2-N5  | 2.124                         | 2.134                       | 2.125                        | 2.117        | 2.111                        | 2.107                       |
| Os2-N11 | 2.082                         | 2.082                       | 2.065                        | 2.060        | 2.058                        | 2.051                       |
| Os2-N12 | 2.083                         | 2.084                       | 2.064                        | 2.057        | 2.060                        | 2.055                       |
| Os2-N13 | 2.095                         | 2.085                       | 2.077                        | 2.075        | 2.077                        | 2.064                       |
| Os2-N14 | 2.095                         | 2.084                       | 2.086                        | 2.085        | 2.087                        | 2.073                       |
| C1-O1   | 1.227                         | 1.228                       | 1.230                        | 1.230        | 1.233                        | 1.232                       |
| C1-C2   | 1.464                         | 1.474                       | 1.463                        | 1.463        | 1.461                        | 1.462                       |
| C2-N1   | 1.361                         | 1.370                       | 1.362                        | 1.361        | 1.362                        | 1.363                       |
| C2-C3   | 1.413                         | 1.414                       | 1.413                        | 1.414        | 1.418                        | 1.418                       |
| C3-N3   | 1.350                         | 1.352                       | 1.350                        | 1.349        | 1.350                        | 1.349                       |
| C3-C4   | 1.476                         | 1.483                       | 1.472                        | 1.472        | 1.472                        | 1.476                       |
| C4-O2   | 1.227                         | 1.228                       | 1.231                        | 1.231        | 1.233                        | 1.232                       |
| C4-C5   | 1.465                         | 1.475                       | 1.464                        | 1.464        | 1.462                        | 1.464                       |
| C5-N4   | 1.361                         | 1.370                       | 1.363                        | 1.362        | 1.363                        | 1.363                       |
| C5-C6   | 1.413                         | 1.414                       | 1.413                        | 1.415        | 1.418                        | 1.418                       |
| C6-C1   | 1.476                         | 1.482                       | 1.349                        | 1.349        | 1.471                        | 1.475                       |
| C6-N6   | 1.350                         | 1.351                       | 1.471                        | 1.472        | 1.350                        | 1.349                       |
| C7-N1   | 1.383                         | 1.373                       | 1.373                        | 1.374        | 1.374                        | 1.374                       |
| C7-N3   | 1.332                         | 1.337                       | 1.337                        | 1.338        | 1.339                        | 1.342                       |

**Table S9** Selected DFT calculated bond lengths (Å) for [2<sup>n</sup>]

| bond    | DFT                           |                             |                              |              |                              |                             |
|---------|-------------------------------|-----------------------------|------------------------------|--------------|------------------------------|-----------------------------|
|         | [2 <sup>3+</sup> ]<br>(S=1/2) | [2 <sup>2+</sup> ]<br>(S=0) | [2 <sup>+</sup> ]<br>(S=1/2) | [2]<br>(S=1) | [2 <sup>-</sup> ]<br>(S=1/2) | [2 <sup>2-</sup> ]<br>(S=0) |
| Os1-N1  | 2.086                         | 2.103                       | 2.101                        | 2.105        | 2.106                        | 2.120                       |
| Os1-N2  | 2.1237                        | 2.131                       | 2.128                        | 2.122        | 2.115                        | 2.113                       |
| Os1-N7  | 2.073                         | 2.064                       | 2.064                        | 2.056        | 2.059                        | 2.051                       |
| Os1-N8  | 2.069                         | 2.053                       | 2.054                        | 2.048        | 2.049                        | 2.046                       |
| Os1-N9  | 2.101                         | 2.083                       | 2.077                        | 2.076        | 2.076                        | 2.066                       |
| Os1-N10 | 2.106                         | 2.097                       | 2.091                        | 2.085        | 2.085                        | 2.078                       |
| Os2-N4  | 2.104                         | 2.110                       | 2.095                        | 2.107        | 2.108                        | 2.128                       |
| Os2-N5  | 2.114                         | 2.126                       | 2.120                        | 2.108        | 2.101                        | 2.091                       |
| Os2-N11 | 2.077                         | 2.061                       | 2.062                        | 2.063        | 2.062                        | 2.050                       |
| Os2-N12 | 2.090                         | 2.072                       | 2.075                        | 2.071        | 2.070                        | 2.064                       |
| Os2-N13 | 2.079                         | 2.067                       | 2.075                        | 2.077        | 2.071                        | 2.070                       |
| Os2-N14 | 2.101                         | 2.092                       | 2.087                        | 2.076        | 2.073                        | 2.072                       |
| C1-O1   | 1.236                         | 1.240                       | 1.239                        | 1.236        | 1.237                        | 1.236                       |
| C1-C2   | 1.471                         | 1.465                       | 1.459                        | 1.463        | 1.461                        | 1.465                       |
| C2-N1   | 1.367                         | 1.368                       | 1.363                        | 1.361        | 1.361                        | 1.363                       |
| C2-C3   | 1.420                         | 1.414                       | 1.416                        | 1.416        | 1.418                        | 1.420                       |
| C3-N3   | 1.346                         | 1.346                       | 1.347                        | 1.348        | 1.349                        | 1.349                       |
| C3-C4   | 1.475                         | 1.478                       | 1.479                        | 1.476        | 1.474                        | 1.472                       |
| C4-O2   | 1.216                         | 1.219                       | 1.222                        | 1.224        | 1.228                        | 1.231                       |
| C4-C5   | 1.472                         | 1.475                       | 1.476                        | 1.474        | 1.474                        | 1.471                       |
| C5-N6   | 1.343                         | 1.347                       | 1.349                        | 1.348        | 1.350                        | 1.351                       |
| C5-C6   | 1.420                         | 1.413                       | 1.414                        | 1.415        | 1.417                        | 1.418                       |
| C6-C1   | 1.469                         | 1.464                       | 1.461                        | 1.462        | 1.462                        | 1.466                       |
| C6-N4   | 1.363                         | 1.365                       | 1.360                        | 1.360        | 1.360                        | 1.362                       |
| C7-N1   | 1.389                         | 1.373                       | 1.373                        | 1.373        | 1.376                        | 1.377                       |
| C7-N3   | 1.326                         | 1.335                       | 1.338                        | 1.339        | 1.340                        | 1.341                       |

**Table S10** Selected DFT calculated bond lengths (Å) for [3<sup>n</sup>]

| bond       | DFT                         |                               |                             |                              |              |                              |                             |
|------------|-----------------------------|-------------------------------|-----------------------------|------------------------------|--------------|------------------------------|-----------------------------|
|            | [3 <sup>4+</sup> ]<br>(S=1) | [3 <sup>3+</sup> ]<br>(S=1/2) | [3 <sup>2+</sup> ]<br>(S=0) | [3 <sup>+</sup> ]<br>(S=1/2) | [3]<br>(S=0) | [3 <sup>-</sup> ]<br>(S=1/2) | [3 <sup>2-</sup> ]<br>(S=0) |
| Os1-O1     | 2.095                       | 2.145                         | 2.153                       | 2.133                        | 2.114        | 2.127                        | 2.127                       |
| Os1-N1     | 2.194                       | 2.155                         | 2.144                       | 2.137                        | 2.137        | 2.160                        | 2.182                       |
| Os1-N3     | 2.101                       | 2.083                         | 2.075                       | 2.065                        | 2.066        | 2.062                        | 2.061                       |
| Os1-N4     | 2.079                       | 2.058                         | 2.045                       | 2.039                        | 2.034        | 2.036                        | 2.043                       |
| Os1-N5     | 2.069                       | 2.069                         | 2.062                       | 2.053                        | 2.050        | 2.047                        | 2.036                       |
| Os1-N6     | 2.087                       | 2.086                         | 2.074                       | 2.059                        | 2.058        | 2.063                        | 2.056                       |
| C1-O1      | 1.283                       | 1.275                         | 1.277                       | 1.302                        | 1.308        | 1.305                        | 1.302                       |
| C1-C2      | 1.421                       | 1.427                         | 1.428                       | 1.417                        | 1.412        | 1.415                        | 1.414                       |
| C2-N1      | 1.350                       | 1.352                         | 1.360                       | 1.366                        | 1.369        | 1.366                        | 1.368                       |
| C2-C3      | 1.421                       | 1.412                         | 1.398                       | 1.406                        | 1.409        | 1.410                        | 1.411                       |
| C3-N2      | 1.335                       | 1.343                         | 1.354                       | 1.363                        | 1.365        | 1.366                        | 1.362                       |
| C4-N2      | 1.361                       | 1.352                         | 1.347                       | 1.342                        | 1.342        | 1.345                        | 1.347                       |
| C4-N1      | 1.395                       | 1.395                         | 1.376                       | 1.376                        | 1.377        | 1.376                        | 1.376                       |
| C4-C5      | 1.434                       | 1.442                         | 1.457                       | 1.458                        | 1.458        | 1.456                        | 1.455                       |
| C5-C6      | 1.410                       | 1.404                         | 1.399                       | 1.400                        | 1.401        | 1.401                        | 1.402                       |
| C6-C7      | 1.380                       | 1.384                         | 1.387                       | 1.387                        | 1.388        | 1.387                        | 1.387                       |
| C7-C8      | 1.410                       | 1.404                         | 1.400                       | 1.399                        | 1.399        | 1.397                        | 1.399                       |
| C8-C11     | 1.485                       | 1.490                         | 1.496                       | 1.497                        | 1.498        | 1.498                        | 1.499                       |
| C8-C9      | 1.411                       | 1.406                         | 1.399                       | 1.398                        | 1.398        | 1.399                        | 1.399                       |
| C9-C10     | 1.377                       | 1.380                         | 1.387                       | 1.388                        | 1.388        | 1.388                        | 1.387                       |
| C10-C5     | 1.416                       | 1.410                         | 1.400                       | 1.400                        | 1.401        | 1.403                        | 1.404                       |
| Os1---Os1' | 8.031                       | 8.036                         | 8.014                       | 7.967                        | 7.960        | 8.001                        | 8.047                       |

**Table S11** Composition and energies of selected molecular orbitals of  $[1^{2+}] (S=0)$ 

| MO     | Energy(ev) | Composition |     |    |     |
|--------|------------|-------------|-----|----|-----|
|        |            | Os1         | Os2 | L1 | bpy |
| HOMO-5 | -8.718     | 29          | 34  | 13 | 23  |
| HOMO-4 | -8.615     | 29          | 19  | 35 | 17  |
| HOMO-3 | -8.522     | 57          | 05  | 17 | 21  |
| HOMO-2 | -8.508     | 6           | 62  | 13 | 19  |
| HOMO-1 | -8.221     | 59          | 7   | 16 | 17  |
| HOMO   | -8.155     | 4           | 6   | 18 | 19  |
| LUMO   | -6.673     | 8           | 2   | 6  | 85  |
| LUMO+1 | -6.603     | 1           | 7   | 3  | 90  |
| LUMO+2 | -6.359     | 9           | 1   | 9  | 81  |
| LUMO+3 | -6.280     | 2           | 9   | 7  | 82  |
| LUMO+4 | -6.088     | 3           | 5   | 64 | 28  |
| LUMO+5 | -5.914     | 0           | 4   | 13 | 83  |

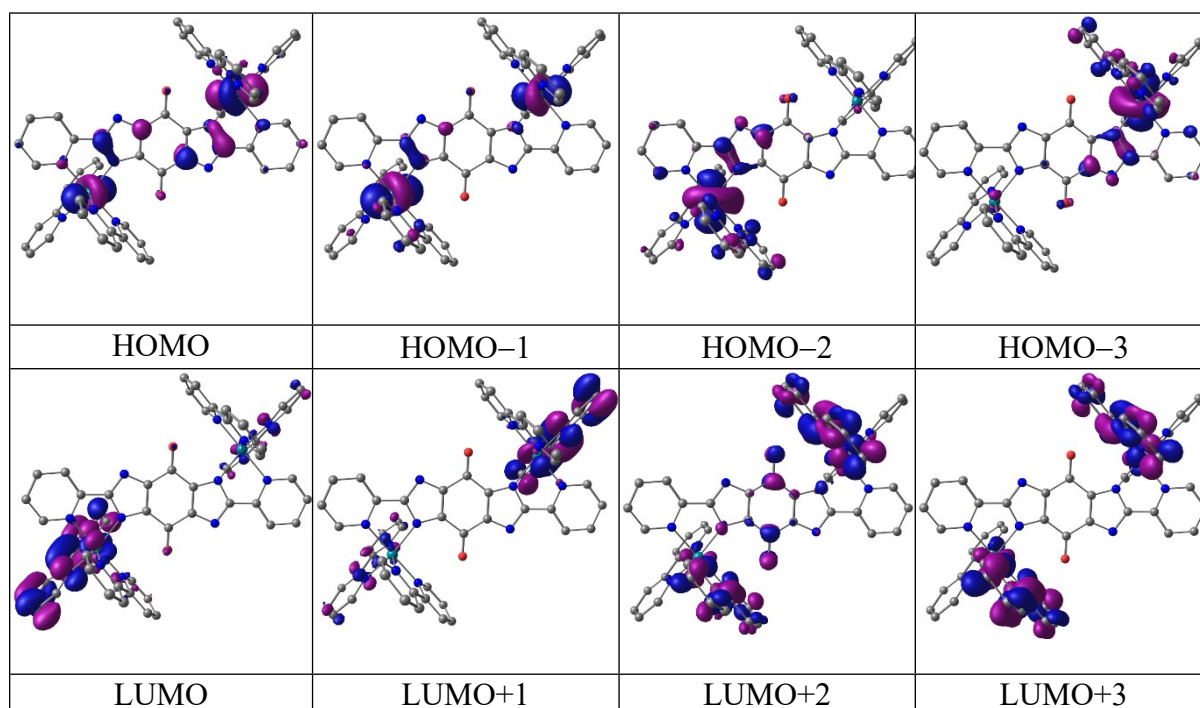**Table S12** Composition and energies of selected molecular orbitals of  $[1^{3+}] (S=1/2)$

| MO             | Energy(ev) | Composition |     |    |     |
|----------------|------------|-------------|-----|----|-----|
|                |            | Os1         | Os2 | L1 | bpy |
| $\alpha$ -spin |            |             |     |    |     |
| HOMO-5         | -11.322    | 40          | 30  | 12 | 18  |
| HOMO-4         | -11.257    | 30          | 36  | 18 | 16  |
| HOMO-3         | -11.212    | 67          | 5   | 10 | 17  |
| HOMO-2         | -11.190    | 8           | 64  | 10 | 18  |
| HOMO-1         | -11.148    | 27          | 40  | 15 | 17  |
| SOMO           | -11.005    | 13          | 17  | 56 | 15  |
| LUMO           | -8.930     | 3           | 2   | 15 | 81  |
| LUMO+1         | -8.906     | 3           | 4   | 3  | 90  |
| LUMO+2         | -8.770     | 3           | 3   | 49 | 44  |
| LUMO+3         | -8.639     | 5           | 4   | 2  | 89  |
| LUMO+4         | -8.582     | 4           | 6   | 24 | 67  |
| LUMO+5         | -8.257     | 3           | 3   | 89 | 5   |
| $\beta$ -spin  |            |             |     |    |     |
| HOMO-5         | -11.272    | 28          | 19  | 35 | 18  |
| HOMO-4         | -11.193    | 38          | 32  | 11 | 20  |
| HOMO-3         | -11.132    | 29          | 34  | 23 | 15  |
| HOMO-2         | -11.047    | 42          | 27  | 14 | 18  |
| HOMO-1         | -10.995    | 13          | 39  | 28 | 19  |
| HOMO           | -10.630    | 37          | 38  | 9  | 16  |
| LUMO           | -10.597    | 33          | 32  | 20 | 15  |
| LUMO+1         | -8.921     | 3           | 2   | 14 | 81  |
| LUMO+2         | -8.896     | 3           | 4   | 4  | 90  |
| LUMO+3         | -8.748     | 4           | 3   | 46 | 47  |
| LUMO+4         | -8.621     | 5           | 4   | 2  | 88  |
| LUMO+5         | -8.555     | 4           | 6   | 27 | 63  |

| $\alpha$ -spin                                                                      |                                                                                     |                                                                                      |                                                                                       |
|-------------------------------------------------------------------------------------|-------------------------------------------------------------------------------------|--------------------------------------------------------------------------------------|---------------------------------------------------------------------------------------|
| 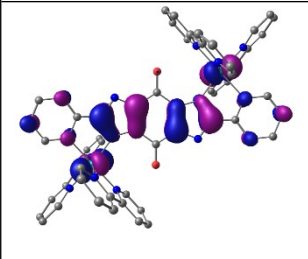   |    |    |    |
| SOMO1                                                                               | HOMO-1                                                                              | HOMO-2                                                                               | HOMO-3                                                                                |
|    |    |    |    |
| LUMO                                                                                | LUMO+1                                                                              | LUMO+2                                                                               | LUMO+3                                                                                |
| $\beta$ -spin                                                                       |                                                                                     |                                                                                      |                                                                                       |
|   |   |   |   |
| HOMO                                                                                | HOMO-1                                                                              | HOMO-2                                                                               | HOMO-3                                                                                |
|  |  |  |  |
| LUMO                                                                                | LUMO+1                                                                              | LUMO+2                                                                               | LUMO+3                                                                                |

**Table S13** Composition and energies of selected molecular orbitals of  $[1^+]$  ( $S=1/2$ )

| MO             | Energy(ev) | Composition |     |    |     |
|----------------|------------|-------------|-----|----|-----|
|                |            | Os1         | Os2 | L1 | bpy |
| $\alpha$ -spin |            |             |     |    |     |
| HOMO-5         | -6.373     | 22          | 36  | 24 | 18  |
| HOMO-4         | -6.285     | 61          | 4   | 15 | 20  |
| HOMO-3         | -6.261     | 5           | 63  | 12 | 21  |
| HOMO-2         | -5.945     | 40          | 35  | 9  | 16  |
| HOMO-1         | -5.930     | 31          | 37  | 16 | 16  |
| SOMO 1         | -4.418     | 2           | 2   | 9  | 87  |
| LUMO           | -4.400     | 3           | 3   | 5  | 89  |
| LUMO+1         | -4.233     | 9           | 2   | 8  | 81  |
| LUMO+2         | -4.193     | 3           | 9   | 2  | 86  |
| LUMO+3         | -3.954     | 4           | 4   | 70 | 22  |
| LUMO+4         | -3.756     | 4           | 4   | 85 | 7   |
| LUMO+5         | -3.582     | 3           | 1   | 26 | 71  |
| $\beta$ -spin  |            |             |     |    |     |
| HOMO-5         | -6.417     | 41          | 27  | 10 | 22  |
| HOMO-4         | -6.348     | 23          | 36  | 24 | 17  |
| HOMO-3         | -6.278     | 60          | 5   | 15 | 20  |
| HOMO-2         | -6.253     | 6           | 62  | 12 | 21  |
| HOMO-1         | -5.938     | 38          | 37  | 9  | 16  |
| HOMO           | -5.924     | 33          | 35  | 16 | 16  |
| LUMO           | -4.272     | 2           | 1   | 15 | 82  |
| LUMO+1         | -4.231     | 2           | 3   | 6  | 89  |
| LUMO+2         | -4.115     | 11          | 0   | 3  | 86  |
| LUMO+3         | -4.090     | 0           | 11  | 3  | 85  |
| LUMO+4         | -3.905     | 4           | 4   | 69 | 24  |
| LUMO+5         | -3.736     | 4           | 4   | 93 | 9   |

| $\alpha$ -spin                                                                      |                                                                                     |                                                                                      |                                                                                       |
|-------------------------------------------------------------------------------------|-------------------------------------------------------------------------------------|--------------------------------------------------------------------------------------|---------------------------------------------------------------------------------------|
| 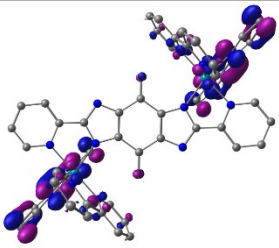   |    |    |    |
| SOMO1                                                                               | HOMO-1                                                                              | HOMO-2                                                                               | HOMO-3                                                                                |
|    |    |    |    |
| LUMO                                                                                | LUMO+1                                                                              | LUMO+2                                                                               | LUMO+3                                                                                |
| $\beta$ -spin                                                                       |                                                                                     |                                                                                      |                                                                                       |
|   |   |   |   |
| HOMO                                                                                | HOMO-1                                                                              | HOMO-2                                                                               | HOMO-3                                                                                |
|  |  |  |  |
| LUMO                                                                                | LUMO+1                                                                              | LUMO+2                                                                               | LUMO+3                                                                                |



**Table S14** Composition and energies of selected molecular orbitals of [1] ( $S=1$ )

| MO             | Energy(ev) | Composition |     |    |     |
|----------------|------------|-------------|-----|----|-----|
|                |            | Os1         | Os2 | L1 | bpy |
| $\alpha$ -spin |            |             |     |    |     |
| HOMO-5         | -4.048     | 57          | 8   | 14 | 21  |
| HOMO-4         | -4.022     | 9           | 58  | 11 | 22  |
| HOMO-3         | -3.694     | 22          | 52  | 8  | 17  |
| HOMO-2         | -3.690     | 50          | 20  | 14 | 16  |
| SOMO 2         | -2.220     | 2           | 2   | 11 | 85  |
| SOMO 1         | -2.196     | 3           | 2   | 7  | 88  |
| LUMO           | -2.044     | 10          | 2   | 6  | 82  |
| LUMO+1         | -2.012     | 2           | 11  | 2  | 85  |
| LUMO+2         | -1.775     | 4           | 2   | 70 | 22  |
| LUMO+3         | -1.652     | 4           | 4   | 84 | 8   |
| LUMO+4         | -1.427     | 1           | 2   | 65 | 3   |
| LUMO+5         | -1.370     | 3           | 2   | 16 | 79  |
| $\beta$ -spin  |            |             |     |    |     |
| HOMO-5         | -4.158     | 42          | 26  | 10 | 22  |
| HOMO-4         | -4.101     | 23          | 38  | 20 | 19  |
| HOMO-3         | -4.029     | 55          | 11  | 13 | 20  |
| HOMO-2         | -4.003     | 12          | 56  | 11 | 21  |
| HOMO-1         | -3.677     | 4           | 69  | 9  | 17  |
| HOMO           | -3.674     | 68          | 3   | 13 | 15  |
| LUMO           | -1.990     | 2           | 1   | 24 | 73  |
| LUMO+1         | -1.928     | 3           | 3   | 10 | 85  |
| LUMO+2         | -1.773     | 7           | 2   | 15 | 76  |
| LUMO+3         | -1.747     | 2           | 8   | 8  | 83  |
| LUMO+4         | -1.685     | 4           | 4   | 59 | 33  |
| LUMO+5         | -1.577     | 5           | 5   | 67 | 23  |

| $\alpha$ -spin                                                                      |                                                                                     |                                                                                      |                                                                                       |
|-------------------------------------------------------------------------------------|-------------------------------------------------------------------------------------|--------------------------------------------------------------------------------------|---------------------------------------------------------------------------------------|
| 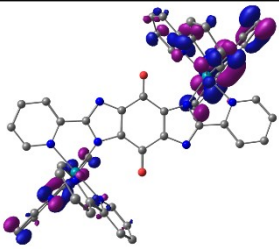   |    |    |    |
| SOMO1                                                                               | SOMO2                                                                               | HOMO-2                                                                               | HOMO-3                                                                                |
|    |    |    |    |
| LUMO                                                                                | LUMO+1                                                                              | LUMO+2                                                                               | LUMO+3                                                                                |
| $\beta$ -spin                                                                       |                                                                                     |                                                                                      |                                                                                       |
|  |  |  |  |
| HOMO                                                                                | HOMO-1                                                                              | HOMO-2                                                                               | HOMO-3                                                                                |
|  |  |  |  |
| LUMO                                                                                | LUMO+1                                                                              | LUMO+2                                                                               | LUMO+3                                                                                |

**Table S15** Composition and energies of selected molecular orbitals of [1<sup>-</sup>] ( $S=1/2$ )

| MO             | Energy(ev) | Composition |     |    |     |
|----------------|------------|-------------|-----|----|-----|
|                |            | Os1         | Os2 | L1 | bpy |
| $\alpha$ -spin |            |             |     |    |     |
| HOMO-5         | -1.814     | 32          | 35  | 13 | 20  |
| HOMO-4         | -1.784     | 36          | 32  | 13 | 19  |
| HOMO-3         | -1.473     | 1           | 72  | 10 | 18  |
| HOMO-2         | -1.462     | 72          | 1   | 11 | 16  |
| HOMO-1         | -0.146     | 0           | 5   | 5  | 95  |
| HOMO           | -0.143     | 5           | 0   | 5  | 95  |
| LUMO           | 0.272      | 5           | 4   | 23 | 68  |
| LUMO+1         | 0.326      | 6           | 7   | 3  | 84  |
| LUMO+2         | 0.420      | 5           | 5   | 83 | 7   |
| LUMO+3         | 0.454      | 5           | 5   | 61 | 30  |
| LUMO+4         | 0.673      | 3           | 3   | 81 | 12  |
| LUMO+5         | 0.822      | 2           | 2   | 54 | 42  |
| $\beta$ -spin  |            |             |     |    |     |
| HOMO-5         | -1.892     | 28          | 32  | 18 | 23  |
| HOMO-4         | -1.812     | 35          | 31  | 14 | 20  |
| HOMO-3         | -1.779     | 32          | 35  | 13 | 20  |
| HOMO-2         | -1.465     | 1           | 71  | 9  | 18  |
| HOMO-1         | -1.453     | 72          | 2   | 10 | 16  |
| HOMO           | 0.023      | 2           | 2   | 12 | 84  |
| LUMO           | 0.059      | 3           | 3   | 5  | 89  |
| LUMO+1         | 0.358      | 5           | 3   | 49 | 43  |
| LUMO+2         | 0.380      | 3           | 4   | 72 | 21  |
| LUMO+3         | 0.417      | 4           | 6   | 12 | 78  |
| LUMO+4         | 0.508      | 7           | 6   | 40 | 47  |
| LUMO+5         | 0.700      | 4           | 4   | 16 | 77  |

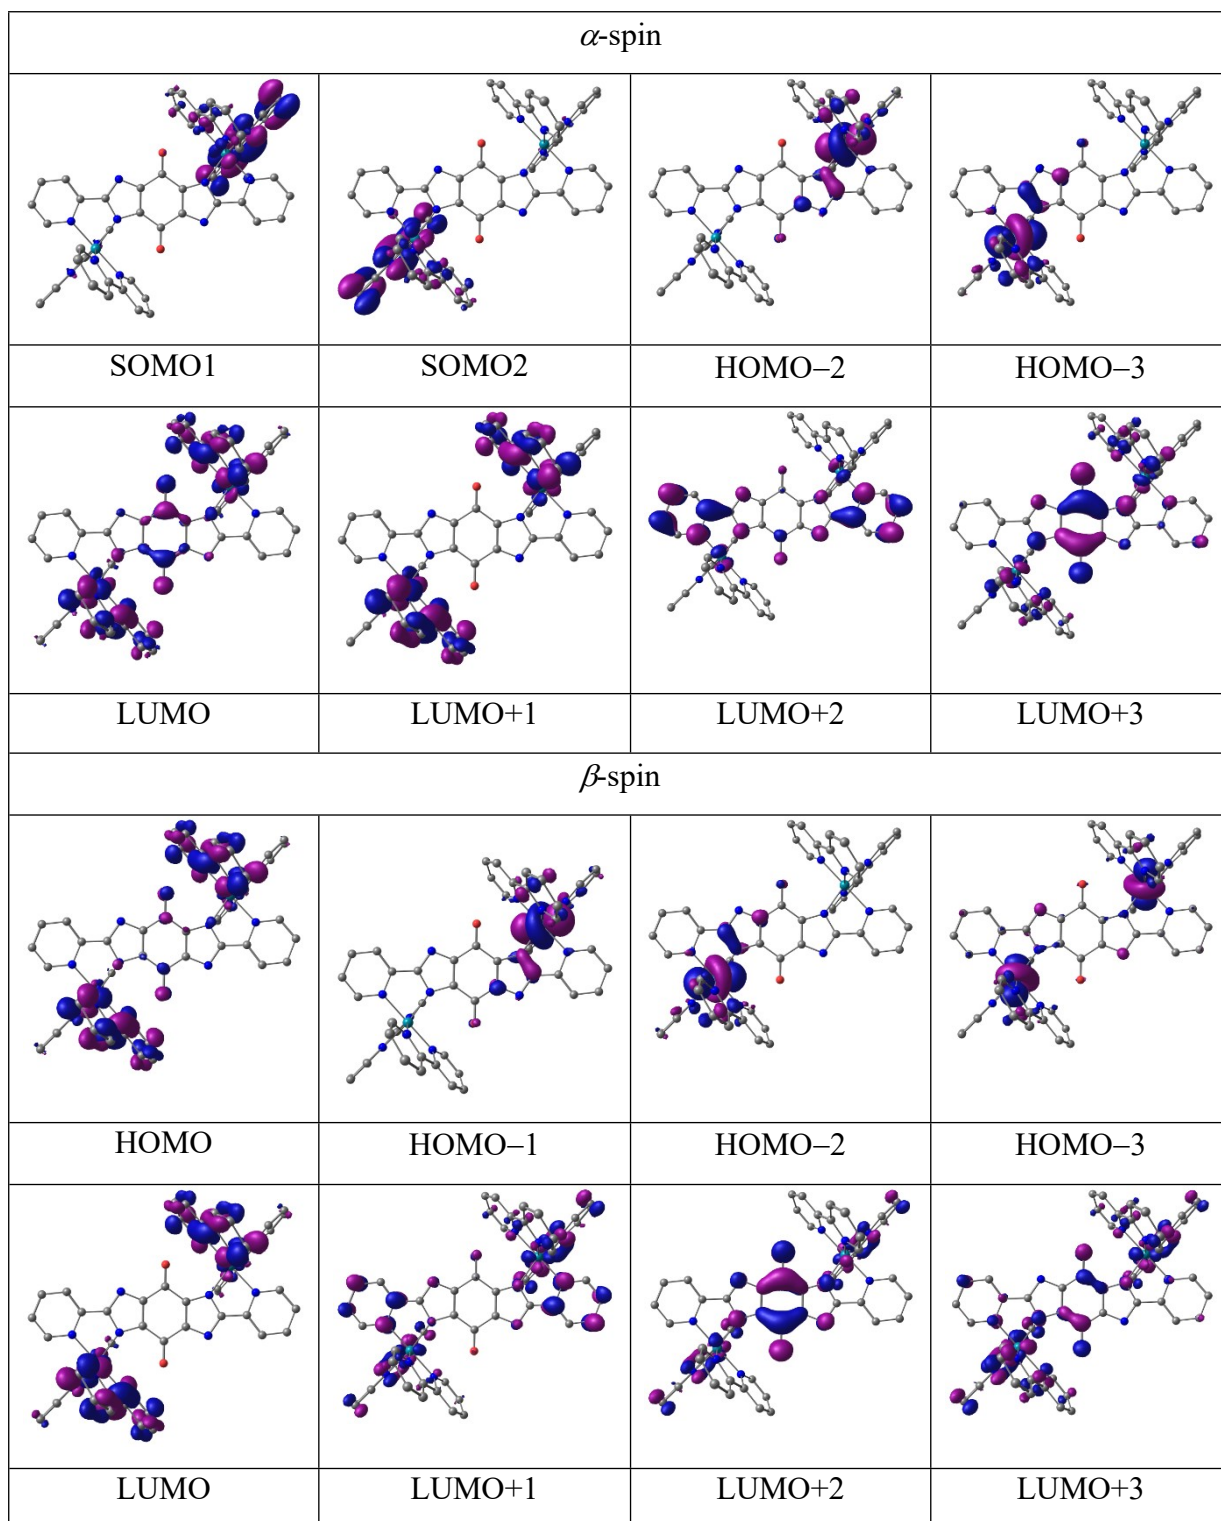

**Table S16** Composition and energies of selected molecular orbitals of  $[1^{2-}] (S=0)$ 

| MO     | Energy(ev) | Composition |     |    |     |
|--------|------------|-------------|-----|----|-----|
|        |            | Os1         | Os2 | L1 | bpy |
| HOMO-5 | 0.392      | 46          | 19  | 14 | 21  |
| HOMO-4 | 0.423      | 20          | 46  | 12 | 21  |
| HOMO-3 | 0.748      | 4           | 67  | 11 | 18  |
| HOMO-2 | 0.753      | 68          | 6   | 10 | 16  |
| HOMO-1 | 2.194      | 2           | 1   | 11 | 86  |
| HOMO   | 2.207      | 1           | 2   | 11 | 86  |
| LUMO   | 2.409      | 8           | 3   | 9  | 80  |
| LUMO+1 | 2.435      | 4           | 4   | 4  | 83  |
| LUMO+2 | 2.619      | 5           | 6   | 77 | 12  |
| LUMO+3 | 2.628      | 5           | 4   | 69 | 23  |
| LUMO+4 | 2.847      | 3           | 4   | 82 | 11  |
| LUMO+5 | 3.001      | 2           | 2   | 64 | 32  |

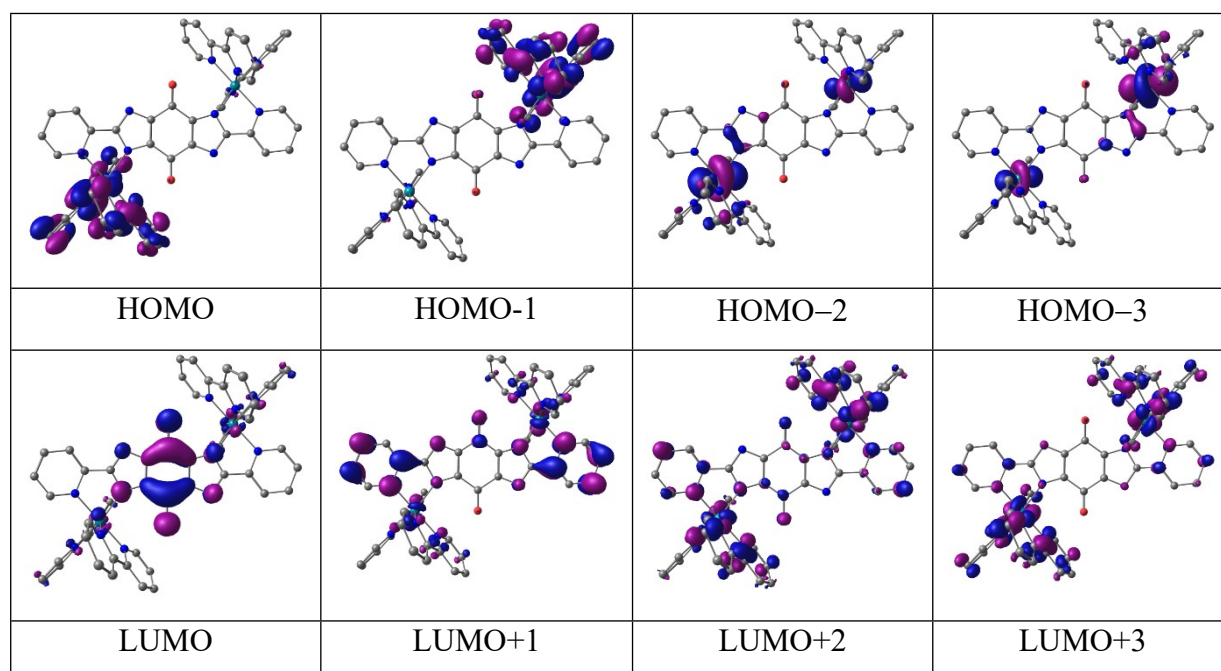

**Table S17.** Composition and Energies of Selected Molecular Orbitals of  $[2^{2+}] (S=0)$ 

| MO     | Energy(ev) |     |     |    |     |
|--------|------------|-----|-----|----|-----|
|        |            | Os1 | Os2 | L1 | bpy |
| HOMO-5 | -8.880     | 5   | 56  | 22 | 17  |
| HOMO-4 | -8.826     | 70  | 1   | 12 | 17  |
| HOMO-3 | -8.812     | 25  | 24  | 36 | 15  |
| HOMO-2 | -8.555     | 20  | 29  | 39 | 12  |
| HOMO-1 | -8.543     | 3   | 16  | 76 | 5   |
| HOMO   | -8.416     | 35  | 11  | 41 | 12  |
| LUMO   | -7.062     | 1   | 4   | 3  | 93  |
| LUMO+1 | -7.054     | 6   | 1   | 3  | 91  |
| LUMO+2 | -6.941     | 0   | 10  | 1  | 88  |
| LUMO+3 | -6.795     | 13  | 0   | 3  | 84  |
| LUMO+4 | -6.402     | 1   | 2   | 32 | 65  |
| LUMO+5 | -6.270     | 2   | 5   | 54 | 39  |

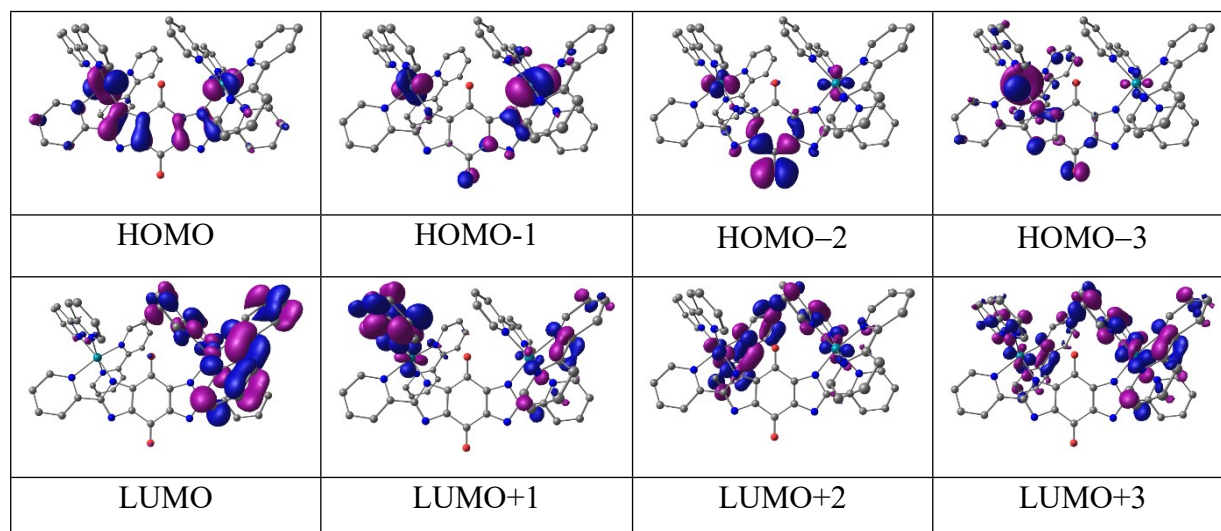

**Table S18** Composition and energies of selected molecular orbitals of [2<sup>3+</sup>] (*S*=1/2)

| MO             | Energy(ev) | Composition |     |    |     |
|----------------|------------|-------------|-----|----|-----|
|                |            | Os1         | Os2 | L1 | bpy |
| <i>α</i> -spin |            |             |     |    |     |
| HOMO-5         | -11.651    | 37          | 30  | 16 | 16  |
| HOMO-4         | -11.611    | 72          | 1   | 12 | 16  |
| HOMO-3         | -11.569    | 1           | 65  | 15 | 18  |
| HOMO-2         | -11.538    | 49          | 15  | 23 | 13  |
| HOMO-1         | -11.375    | 17          | 13  | 63 | 7   |
| SOMO1          | -11.345    | 3           | 2   | 93 | 2   |
| LUMO           | -9.421     | 4           | 1   | 11 | 84  |
| LUMO+1         | -9.291     | 1           | 7   | 2  | 90  |
| LUMO+2         | -9.268     | 1           | 7   | 8  | 85  |
| LUMO+3         | -9.206     | 10          | 1   | 3  | 87  |
| LUMO+4         | -9.102     | 4           | 4   | 74 | 18  |
| LUMO+5         | -8.558     | 1           | 2   | 11 | 86  |
| <i>β</i> -spin |            |             |     |    |     |
| HOMO-5         | -11.616    | 15          | 55  | 8  | 22  |
| HOMO-4         | -11.506    | 64          | 5   | 16 | 15  |
| HOMO-3         | -11.457    | 7           | 58  | 17 | 19  |
| HOMO-2         | -11.426    | 22          | 12  | 58 | 9   |
| HOMO-1         | -11.312    | 7           | 7   | 80 | 5   |
| HOMO           | -11.104    | 38          | 33  | 15 | 14  |
| LUMO           | -11.008    | 26          | 30  | 33 | 12  |
| LUMO+1         | -9.404     | 5           | 1   | 10 | 85  |
| LUMO+2         | -9.282     | 1           | 7   | 2  | 90  |
| LUMO+3         | -9.255     | 1           | 8   | 6  | 85  |
| LUMO+4         | -9.193     | 11          | 1   | 3  | 86  |
| LUMO+5         | -9.051     | 4           | 4   | 76 | 16  |

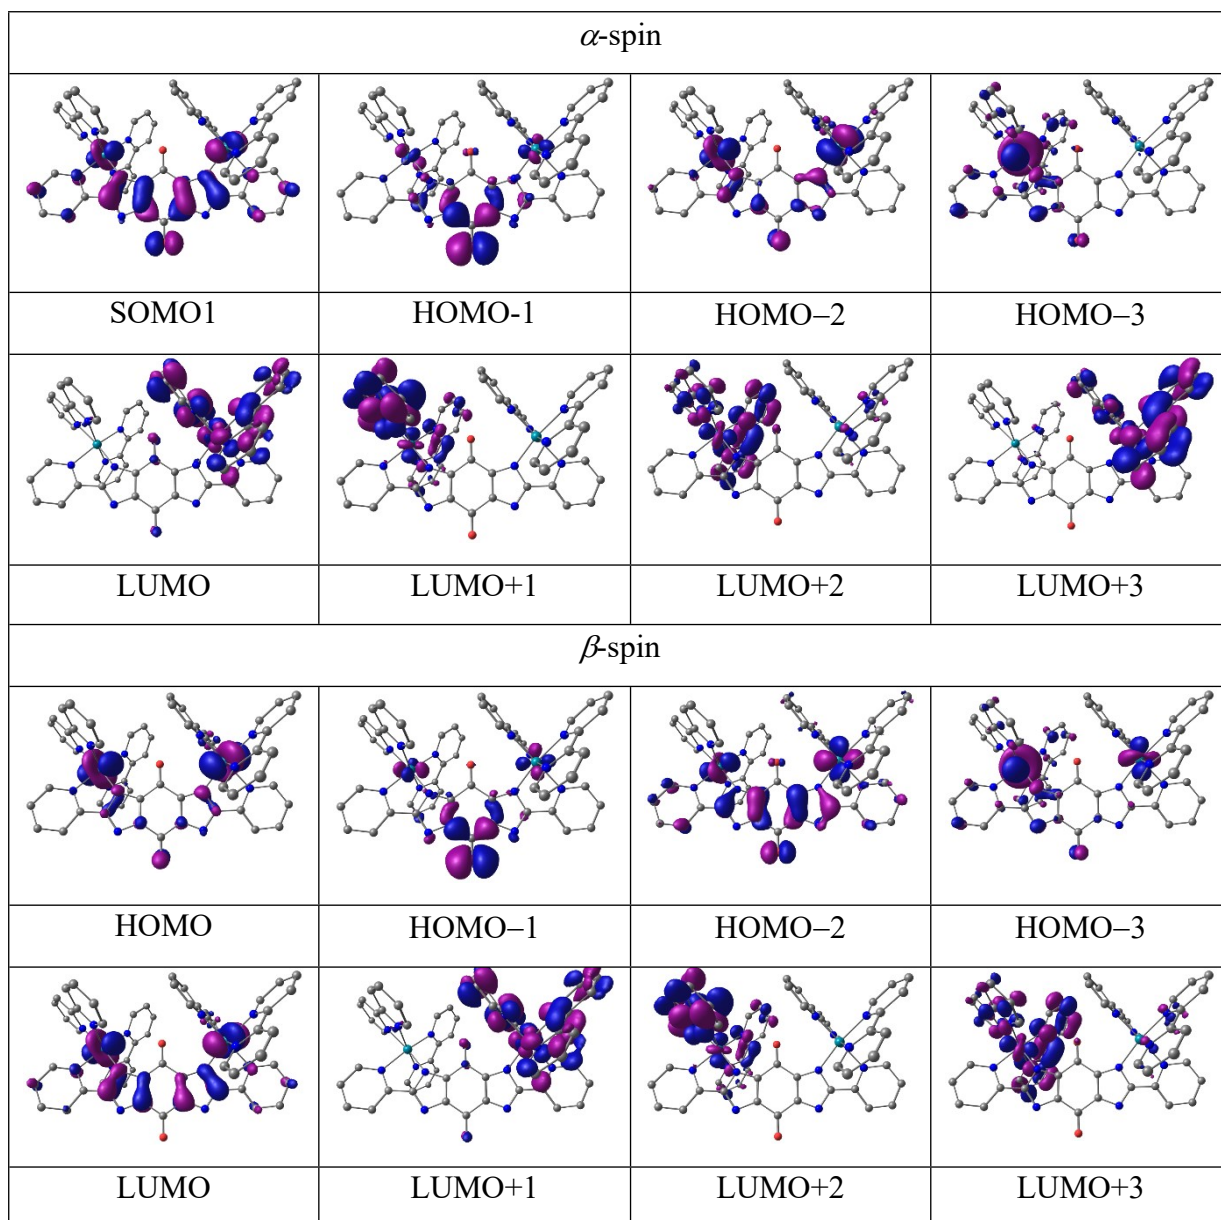



**Table S19** Composition and energies of selected molecular orbitals of [2<sup>+</sup>] (*S*=1/2)

| MO             | Energy(ev) | Composition |     |    |     |
|----------------|------------|-------------|-----|----|-----|
|                |            | Os1         | Os2 | L1 | bpy |
| <i>α</i> -spin |            |             |     |    |     |
| HOMO-5         | -6.568     | 45          | 11  | 28 | 16  |
| HOMO-4         | -6.538     | 10          | 51  | 19 | 20  |
| HOMO-3         | -6.465     | 53          | 6   | 23 | 18  |
| HOMO-2         | -6.238     | 17          | 53  | 16 | 14  |
| HOMO-1         | -6.155     | 53          | 12  | 21 | 15  |
| SOMO 1         | -4.702     | 3           | 3   | 9  | 86  |
| LUMO           | -4.635     | 3           | 5   | 3  | 89  |
| LUMO+1         | -4.595     | 0           | 10  | 4  | 85  |
| LUMO+2         | -4.457     | 13          | 0   | 4  | 83  |
| LUMO+3         | -4.218     | 4           | 4   | 78 | 13  |
| LUMO+4         | -3.886     | 1           | 2   | 16 | 81  |
| LUMO+5         | -3.848     | 1           | 3   | 57 | 39  |
| <i>β</i> -spin |            |             |     |    |     |
| HOMO-5         | -6.637     | 6           | 10  | 80 | 5   |
| HOMO-4         | -6.556     | 44          | 12  | 29 | 15  |
| HOMO-3         | -6.526     | 8           | 53  | 19 | 20  |
| HOMO-2         | -6.453     | 54          | 5   | 22 | 18  |
| HOMO-1         | -6.231     | 16          | 54  | 17 | 14  |
| HOMO           | -6.145     | 53          | 11  | 21 | 15  |
| LUMO           | -4.569     | 1           | 3   | 13 | 83  |
| LUMO+1         | -4.499     | 2           | 5   | 3  | 89  |
| LUMO+2         | -4.465     | 1           | 8   | 3  | 88  |
| LUMO+3         | -4.323     | 11          | 1   | 4  | 84  |
| LUMO+4         | -4.176     | 5           | 4   | 74 | 17  |
| LUMO+5         | -3.860     | 1           | 2   | 17 | 80  |

| $\alpha$ -spin                                                                      |                                                                                     |                                                                                      |                                                                                       |
|-------------------------------------------------------------------------------------|-------------------------------------------------------------------------------------|--------------------------------------------------------------------------------------|---------------------------------------------------------------------------------------|
| 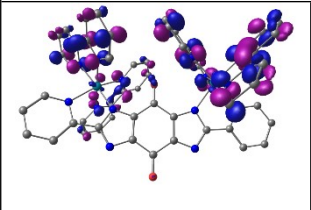   |    |    |    |
| SOMO1                                                                               | HOMO-1                                                                              | HOMO-2                                                                               | HOMO-3                                                                                |
|    |    |    |    |
| LUMO                                                                                | LUMO+1                                                                              | LUMO+2                                                                               | LUMO+3                                                                                |
| $\beta$ -spin                                                                       |                                                                                     |                                                                                      |                                                                                       |
|   |   |   |   |
| HOMO                                                                                | HOMO-1                                                                              | HOMO-2                                                                               | HOMO-3                                                                                |
|  |  |  |  |
| LUMO                                                                                | LUMO+1                                                                              | LUMO+2                                                                               | LUMO+3                                                                                |

**Table S20** Composition and energies of selected molecular orbitals of [2] ( $S=1$ )

| MO             | Energy(ev) | Composition |     |    |     |
|----------------|------------|-------------|-----|----|-----|
|                |            | Os1         | Os2 | L1 | bpy |
| $\alpha$ -spin |            |             |     |    |     |
| HOMO-5         | -4.175     | 22          | 42  | 14 | 22  |
| HOMO-4         | -4.140     | 43          | 21  | 15 | 21  |
| HOMO-3         | -3.873     | 35          | 38  | 12 | 15  |
| HOMO-2         | -3.821     | 36          | 32  | 17 | 15  |
| SOMO 2         | -2.394     | 3           | 1   | 13 | 83  |
| SOMO 1         | -2.302     | 2           | 5   | 4  | 89  |
| LUMO           | -2.251     | 0           | 11  | 5  | 84  |
| LUMO+1         | -2.157     | 12          | 1   | 5  | 82  |
| LUMO+2         | -1.970     | 5           | 5   | 73 | 17  |
| LUMO+3         | -1.666     | 2           | 2   | 84 | 12  |
| LUMO+4         | -1.584     | 4           | 2   | 51 | 44  |
| LUMO+5         | -1.491     | 1           | 4   | 22 | 73  |
| $\beta$ -spin  |            |             |     |    |     |
| HOMO-5         | -4.278     | 22          | 47  | 9  | 23  |
| HOMO-4         | -4.219     | 39          | 22  | 21 | 18  |
| HOMO-3         | -4.142     | 29          | 36  | 15 | 20  |
| HOMO-2         | -4.115     | 36          | 29  | 15 | 20  |
| HOMO-1         | -3.853     | 33          | 39  | 12 | 15  |
| HOMO           | -3.801     | 37          | 31  | 17 | 15  |
| LUMO           | -2.159     | 1           | 2   | 31 | 66  |
| LUMO+1         | -2.058     | 2           | 5   | 5  | 88  |
| LUMO+2         | -1.961     | 1           | 8   | 5  | 86  |
| LUMO+3         | -1.906     | 8           | 3   | 26 | 63  |
| LUMO+4         | -1.861     | 6           | 3   | 42 | 49  |
| LUMO+5         | -1.614     | 3           | 3   | 73 | 16  |

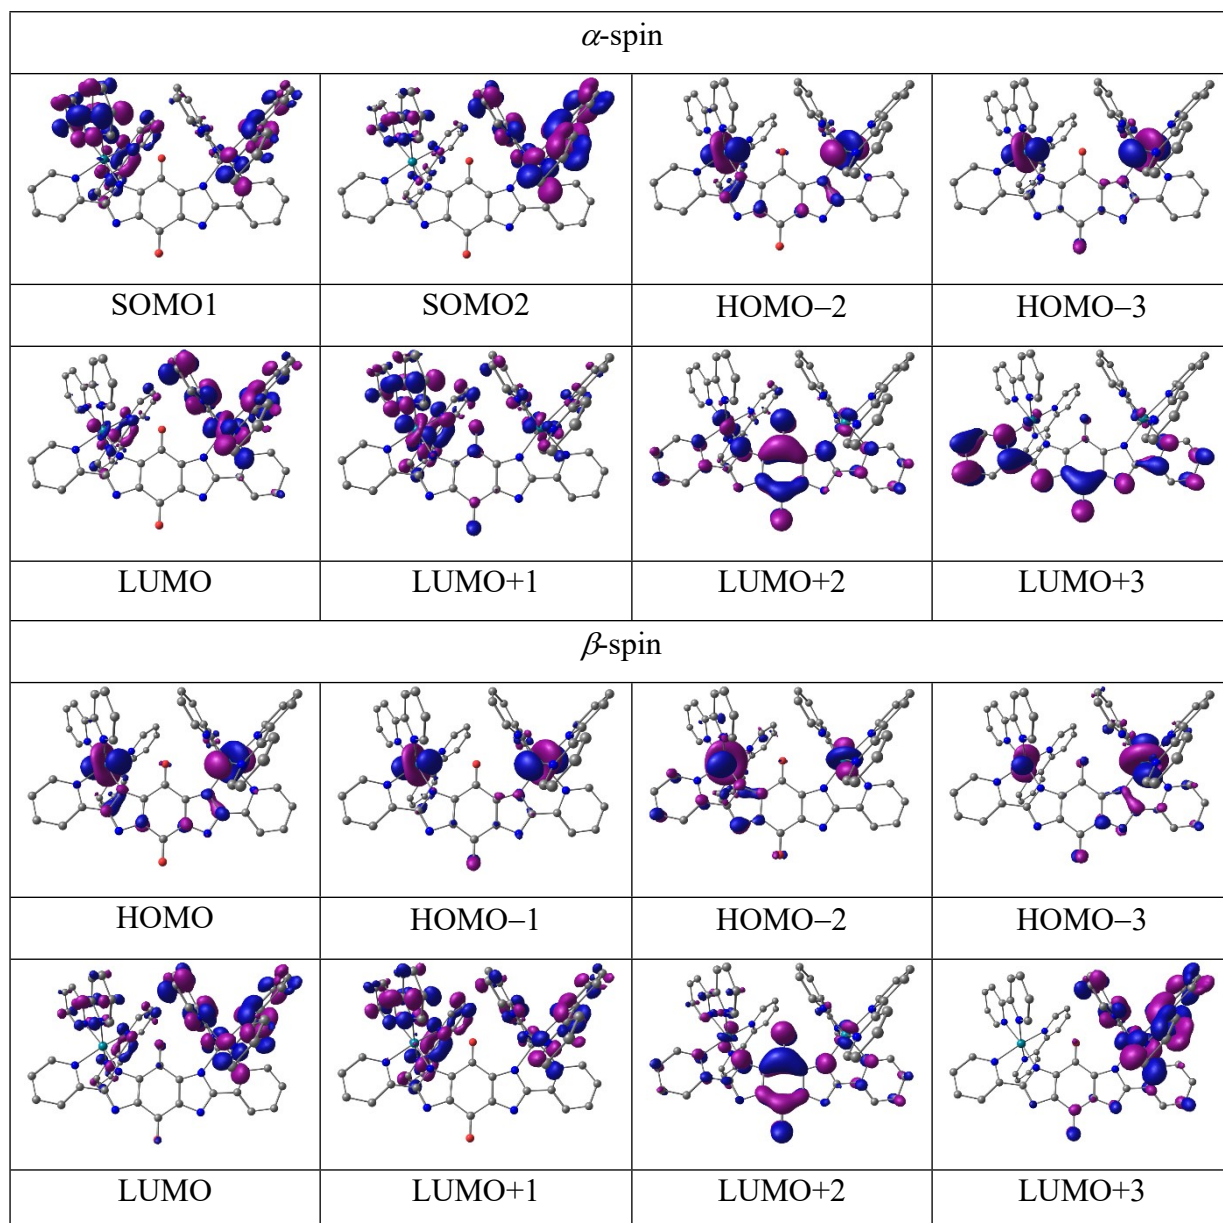

**Table S21** Composition and energies of selected molecular orbitals of [2<sup>-</sup>] (*S*=1/2)

| MO             | Energy(ev) | Composition |     |    |     |
|----------------|------------|-------------|-----|----|-----|
|                |            | Os1         | Os2 | L1 | bpy |
| <i>α</i> -spin |            |             |     |    |     |
| HOMO-5         | -1.788     | 1           | 66  | 10 | 23  |
| HOMO-4         | -1.702     | 1           | 61  | 14 | 24  |
| HOMO-3         | -1.543     | 70          | 2   | 12 | 17  |
| HOMO-2         | -1.380     | 1           | 70  | 14 | 15  |
| HOMO-1         | -0.104     | 4           | 0   | 11 | 85  |
| HOMO           | 0.106      | 4           | 3   | 16 | 77  |
| LUMO           | 0.147      | 9           | 2   | 7  | 82  |
| LUMO+1         | 0.356      | 6           | 6   | 65 | 23  |
| LUMO+2         | 0.494      | 0           | 8   | 15 | 77  |
| LUMO+3         | 0.567      | 5           | 1   | 83 | 12  |
| LUMO+4         | 0.671      | 2           | 5   | 55 | 37  |
| LUMO+5         | 0.808      | 4           | 2   | 34 | 59  |
| <i>β</i> -spin |            |             |     |    |     |
| HOMO-5         | -1.872     | 20          | 46  | 12 | 22  |
| HOMO-4         | -1.819     | 59          | 4   | 15 | 22  |
| HOMO-3         | -1.696     | 1           | 64  | 14 | 21  |
| HOMO-2         | -1.516     | 69          | 3   | 11 | 17  |
| HOMO-1         | -1.393     | 2           | 69  | 14 | 14  |
| HOMO           | 0.046      | 1           | 8   | 7  | 84  |
| LUMO           | 0.163      | 5           | 3   | 12 | 81  |
| LUMO+1         | 0.327      | 6           | 1   | 52 | 41  |
| LUMO+2         | 0.458      | 4           | 2   | 20 | 74  |
| LUMO+3         | 0.523      | 3           | 5   | 42 | 49  |
| LUMO+4         | 0.639      | 6           | 1   | 65 | 28  |
| LUMO+5         | 0.704      | 4           | 4   | 54 | 38  |

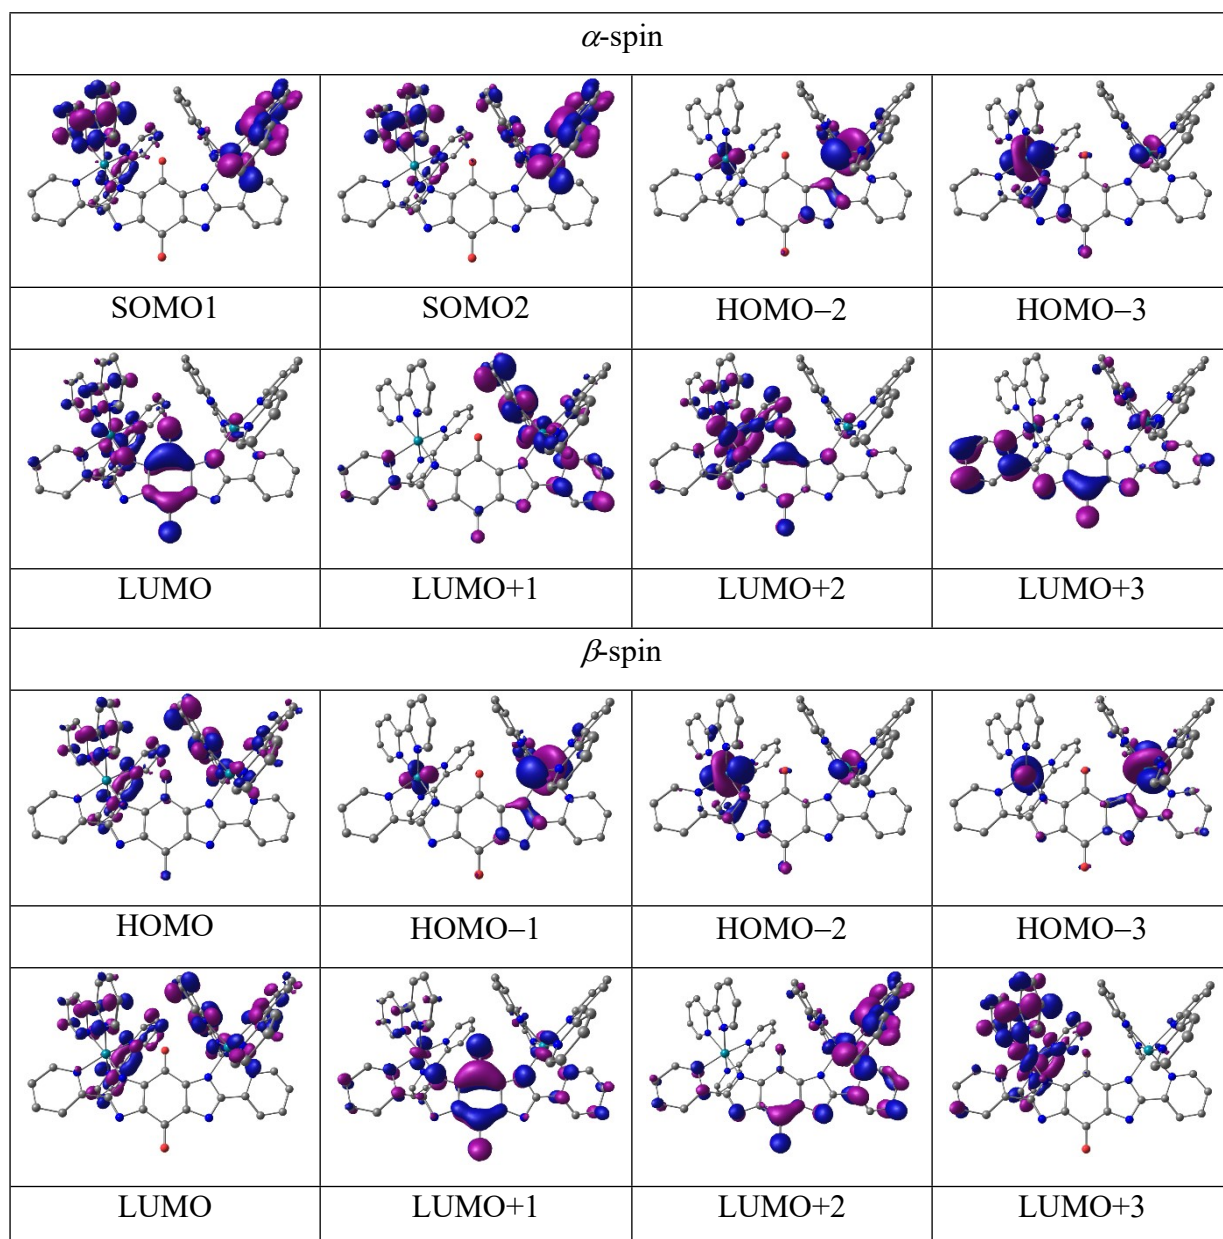

**Table S22** Composition and energies of selected molecular orbitals of [2<sup>2-</sup>] (S=0)

| MO     | Energy(ev) | Composition |     |    |     |
|--------|------------|-------------|-----|----|-----|
|        |            | Os1         | Os2 | L1 | bpy |
| HOMO-5 | 0.485      | 46          | 19  | 16 | 18  |
| HOMO-4 | 0.534      | 23          | 44  | 15 | 18  |
| HOMO-3 | 0.754      | 34          | 39  | 10 | 17  |
| HOMO-2 | 0.799      | 38          | 34  | 11 | 17  |
| HOMO-1 | 2.202      | 1           | 1   | 11 | 87  |
| HOMO   | 2.321      | 1           | 2   | 5  | 92  |
| LUMO   | 2.448      | 1           | 4   | 71 | 18  |
| LUMO+1 | 2.497      | 3           | 1   | 69 | 28  |
| LUMO+2 | 2.686      | 3           | 9   | 28 | 60  |
| LUMO+3 | 2.701      | 3           | 9   | 34 | 54  |
| LUMO+4 | 2.805      | 10          | 3   | 59 | 29  |
| LUMO+5 | 2.983      | 2           | 2   | 82 | 14  |
|        |            |             |     |    |     |

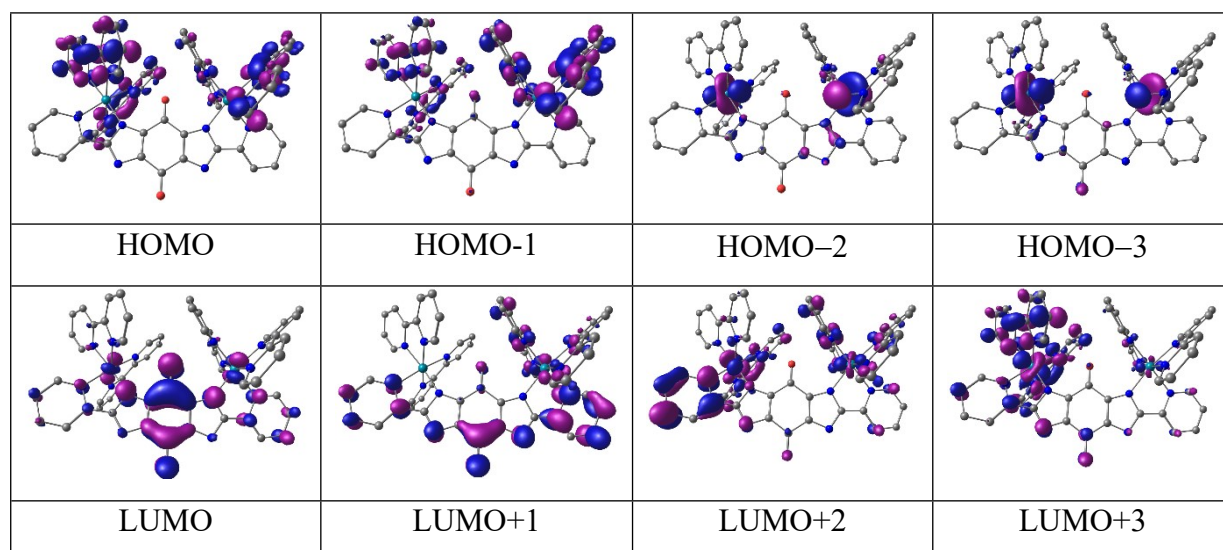

**Table S23** Composition and energies of selected molecular orbitals of  $[3^{2+}] (S=0)$ 

| MO     | Energy(ev) | Composition |     |    |     |
|--------|------------|-------------|-----|----|-----|
|        |            | Os1         | Os2 | L2 | bpy |
| HOMO-5 | -8.845     | 32          | 32  | 11 | 24  |
| HOMO-4 | -8.840     | 33          | 33  | 9  | 24  |
| HOMO-3 | -8.607     | 31          | 31  | 20 | 18  |
| HOMO-2 | -8.502     | 33          | 33  | 19 | 16  |
| HOMO-1 | -8.437     | 34          | 34  | 12 | 19  |
| HOMO   | -8.292     | 9           | 9   | 79 | 4   |
| LUMO   | -8.279     | 4           | 4   | 74 | 17  |
| LUMO+1 | -6.698     | 5           | 5   | 2  | 89  |
| LUMO+2 | -6.660     | 6           | 6   | 5  | 83  |
| LUMO+3 | -6.606     | 6           | 6   | 2  | 87  |
| LUMO+4 | -6.596     | 6           | 6   | 4  | 84  |
| LUMO+5 | -5.953     | 1           | 1   | 3  | 94  |

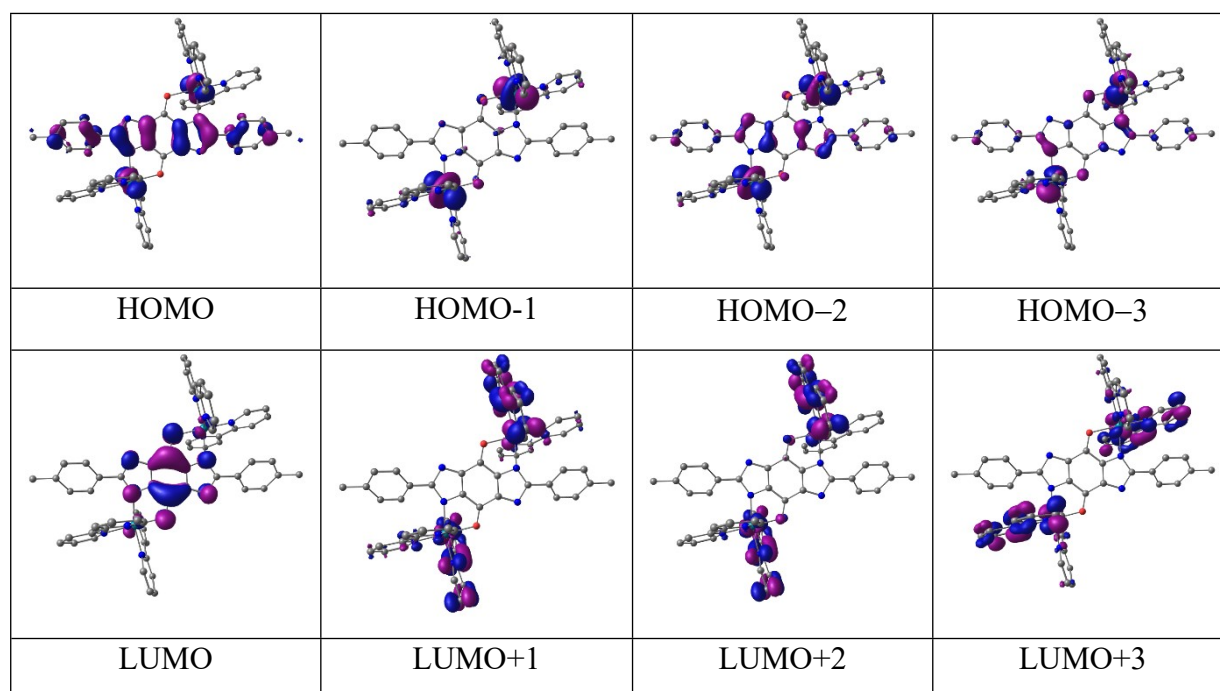



**Table S24** Composition and energies of selected molecular orbitals of [3<sup>3+</sup>] (*S*=1/2)

| MO             | Energy(ev) | Composition |     |    |     |
|----------------|------------|-------------|-----|----|-----|
|                |            | Os1         | Os2 | L2 | bpy |
| <i>α</i> -spin |            |             |     |    |     |
| HOMO-5         | -11.417    | 35          | 39  | 7  | 19  |
| HOMO-4         | -11.415    | 36          | 32  | 14 | 18  |
| HOMO-3         | -11.221    | 36          | 36  | 12 | 17  |
| HOMO-2         | -11.195    | 37          | 37  | 8  | 18  |
| HOMO-1         | -11.119    | 32          | 32  | 18 | 18  |
| SOMO           | -11.014    | 5           | 5   | 87 | 3   |
| LUMO           | -9.872     | 6           | 6   | 80 | 8   |
| LUMO+1         | -8.944     | 4           | 4   | 2  | 91  |
| LUMO+2         | -8.924     | 4           | 4   | 3  | 88  |
| LUMO+3         | -8.883     | 5           | 5   | 2  | 88  |
| LUMO+4         | -8.882     | 5           | 5   | 2  | 88  |
| LUMO+5         | -8.102     | 1           | 1   | 5  | 93  |
| <i>β</i> -spin |            |             |     |    |     |
| HOMO-5         | -11.521    | 33          | 33  | 16 | 18  |
| HOMO-4         | -11.294    | 33          | 33  | 13 | 21  |
| HOMO-3         | -11.278    | 36          | 35  | 7  | 22  |
| HOMO-2         | -11.032    | 30          | 30  | 24 | 16  |
| HOMO-1         | -10.928    | 23          | 23  | 43 | 12  |
| HOMO           | -10.873    | 39          | 39  | 6  | 16  |
| LUMO           | -10.781    | 23          | 23  | 45 | 8   |
| LUMO+1         | -9.848     | 6           | 6   | 79 | 9   |
| LUMO+2         | -8.935     | 4           | 4   | 2  | 90  |
| LUMO+3         | -8.914     | 5           | 5   | 3  | 88  |
| LUMO+4         | -8.873     | 5           | 6   | 2  | 87  |
| LUMO+5         | -8.873     | 5           | 6   | 2  | 88  |

| $\alpha$ -spin                                                                      |                                                                                     |                                                                                      |                                                                                       |
|-------------------------------------------------------------------------------------|-------------------------------------------------------------------------------------|--------------------------------------------------------------------------------------|---------------------------------------------------------------------------------------|
| 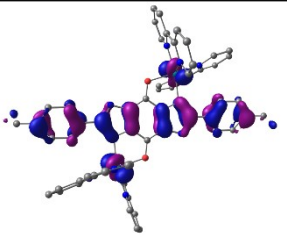   |    |    |    |
| SOMO1                                                                               | HOMO-1                                                                              | HOMO-2                                                                               | HOMO-3                                                                                |
|    |    |    |    |
| LUMO                                                                                | LUMO+1                                                                              | LUMO+2                                                                               | LUMO+3                                                                                |
| $\beta$ -spin                                                                       |                                                                                     |                                                                                      |                                                                                       |
|  |  |  |  |
| HOMO                                                                                | HOMO-1                                                                              | HOMO-2                                                                               | HOMO-3                                                                                |
|  |  |  |  |
| LUMO                                                                                | LUMO+1                                                                              | LUMO+2                                                                               | LUMO+3                                                                                |

**Table S25** Composition and energies of selected molecular orbitals of [3<sup>4+</sup>] (S=1)

| MO             | Energy(ev) | Composition |     |    |     |
|----------------|------------|-------------|-----|----|-----|
|                |            | Os1         | Os2 | L2 | bpy |
| $\alpha$ -spin |            |             |     |    |     |
| HOMO-5         | -14.174    | 2           | 1   | 94 | 3   |
| HOMO-4         | -14.088    | 23          | 23  | 43 | 12  |
| HOMO-3         | -14.035    | 34          | 34  | 9  | 22  |
| HOMO-2         | -14.017    | 35          | 35  | 8  | 22  |
| SOMO 2         | -13.713    | 18          | 18  | 54 | 10  |
| SOMO 1         | -13.404    | 20          | 20  | 94 | 20  |
| LUMO           | -12.414    | 5           | 5   | 83 | 6   |
| LUMO+1         | -11.237    | 3           | 4   | 2  | 91  |
| LUMO+2         | -11.230    | 4           | 4   | 2  | 90  |
| LUMO+3         | -11.155    | 4           | 4   | 2  | 90  |
| LUMO+4         | -11.147    | 4           | 4   | 1  | 91  |
| LUMO+5         | -10.325    | 1           | 1   | 5  | 93  |
| $\beta$ -spin  |            |             |     |    |     |
| HOMO-5         | -14.087    | 33          | 33  | 16 | 18  |
| HOMO-4         | -13.901    | 21          | 21  | 48 | 10  |
| HOMO-3         | -13.846    | 1           | 69  | 9  | 21  |
| HOMO-2         | -13.845    | 69          | 1   | 9  | 21  |
| HOMO-1         | -13.510    | 21          | 21  | 49 | 10  |
| HOMO           | -13.270    | 29          | 29  | 29 | 14  |
| LUMO           | -13.237    | 38          | 38  | 7  | 17  |
| LUMO+1         | -13.145    | 15          | 15  | 64 | 5   |
| LUMO+2         | -12.368    | 6           | 6   | 81 | 7   |
| LUMO+3         | -11.209    | 4           | 4   | 2  | 91  |
| LUMO+4         | -11.201    | 4           | 4   | 2  | 89  |
| LUMO+5         | -11.129    | 4           | 4   | 2  | 90  |

| $\alpha$ -spin                                                                      |                                                                                     |                                                                                      |                                                                                       |
|-------------------------------------------------------------------------------------|-------------------------------------------------------------------------------------|--------------------------------------------------------------------------------------|---------------------------------------------------------------------------------------|
| 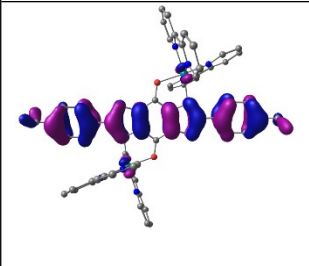   |    |    |    |
| SOMO1                                                                               | SOMO2                                                                               | HOMO-2                                                                               | HOMO-3                                                                                |
|    |    |    |    |
| LUMO                                                                                | LUMO+1                                                                              | LUMO+2                                                                               | LUMO+3                                                                                |
| $\beta$ -spin                                                                       |                                                                                     |                                                                                      |                                                                                       |
|   |   |   |   |
| HOMO                                                                                | HOMO-1                                                                              | HOMO-2                                                                               | HOMO-3                                                                                |
|  |  |  |  |
| LUMO                                                                                | LUMO+1                                                                              | LUMO+2                                                                               | LUMO+3                                                                                |

**Table S26** Composition and energies of selected molecular orbitals of [3<sup>+</sup>] (*S*=1/2)

| MO             | Energy(ev) | Composition |     |    |     |
|----------------|------------|-------------|-----|----|-----|
|                |            | Os1         | Os2 | L2 | bpy |
| <i>α</i> -spin |            |             |     |    |     |
| HOMO-5         | -6.498     | 33          | 32  | 9  | 26  |
| HOMO-4         | -6.190     | 30          | 30  | 21 | 20  |
| HOMO-3         | -6.093     | 34          | 33  | 18 | 15  |
| HOMO-2         | -6.087     | 37          | 37  | 8  | 17  |
| HOMO-1         | -5.878     | 7           | 7   | 82 | 4   |
| HOMO           | -4.751     | 1           | 1   | 56 | 42  |
| LUMO           | -4.521     | 5           | 5   | 2  | 88  |
| LUMO+1         | -4.432     | 7           | 7   | 8  | 79  |
| LUMO+2         | -4.419     | 6           | 6   | 2  | 85  |
| LUMO+3         | -4.394     | 7           | 7   | 23 | 63  |
| LUMO+4         | -3.759     | 1           | 1   | 3  | 95  |
| LUMO+5         | -3.756     | 1           | 1   | 3  | 95  |
| <i>β</i> -spin |            |             |     |    |     |
| HOMO-5         | -6.495     | 27          | 38  | 10 | 25  |
| HOMO-4         | -6.495     | 37          | 26  | 12 | 25  |
| HOMO-3         | -6.175     | 29          | 29  | 23 | 19  |
| HOMO-2         | -6.076     | 37          | 36  | 10 | 17  |
| HOMO-1         | -6.074     | 34          | 34  | 17 | 15  |
| HOMO           | -5.856     | 6           | 6   | 85 | 3   |
| LUMO           | -4.536     | 2           | 2   | 17 | 79  |
| LUMO+1         | -4.456     | 5           | 5   | 2  | 89  |
| LUMO+2         | -4.372     | 6           | 6   | 2  | 86  |
| LUMO+3         | -4.370     | 6           | 6   | 2  | 86  |
| LUMO+4         | -4.153     | 6           | 6   | 67 | 20  |
| LUMO+5         | -3.743     | 1           | 1   | 3  | 95  |

| $\alpha$ -spin                                                                      |                                                                                     |                                                                                      |                                                                                       |
|-------------------------------------------------------------------------------------|-------------------------------------------------------------------------------------|--------------------------------------------------------------------------------------|---------------------------------------------------------------------------------------|
| 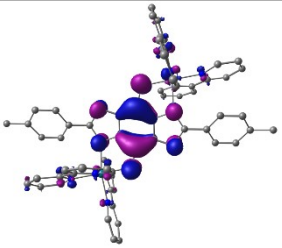   |    |    |    |
| SOMO1                                                                               | HOMO-1                                                                              | HOMO-2                                                                               | HOMO-3                                                                                |
|    |    |    |    |
| LUMO                                                                                | LUMO+1                                                                              | LUMO+2                                                                               | LUMO+3                                                                                |
| $\beta$ -spin                                                                       |                                                                                     |                                                                                      |                                                                                       |
|   |   |   |   |
| HOMO                                                                                | HOMO-1                                                                              | HOMO-2                                                                               | HOMO-3                                                                                |
|  |  |  |  |
| LUMO                                                                                | LUMO+1                                                                              | LUMO+2                                                                               | LUMO+3                                                                                |

**Table S27** Composition and energies of selected molecular orbitals of [3] ( $S=0$ )

| MO     | Energy(ev) | Composition |     |    |     |
|--------|------------|-------------|-----|----|-----|
|        |            | Os1         | Os2 | L2 | bpy |
| HOMO-5 | -4.172     | 14          | 49  | 10 | 26  |
| HOMO-4 | -3.909     | 28          | 31  | 20 | 21  |
| HOMO-3 | -3.766     | 49          | 14  | 22 | 15  |
| HOMO-2 | -3.740     | 18          | 52  | 11 | 18  |
| HOMO-1 | -3.607     | 10          | 8   | 77 | 5   |
| HOMO   | -2.367     | 1           | 1   | 41 | 57  |
| LUMO   | -2.189     | 4           | 8   | 2  | 86  |
| LUMO+1 | -2.148     | 1           | 12  | 2  | 85  |
| LUMO+2 | -2.135     | 4           | 8   | 4  | 84  |
| LUMO+3 | -1.976     | 7           | 9   | 41 | 44  |
| LUMO+4 | -1.482     | 2           | 0   | 4  | 94  |
| LUMO+5 | -1.473     | 0           | 2   | 3  | 95  |

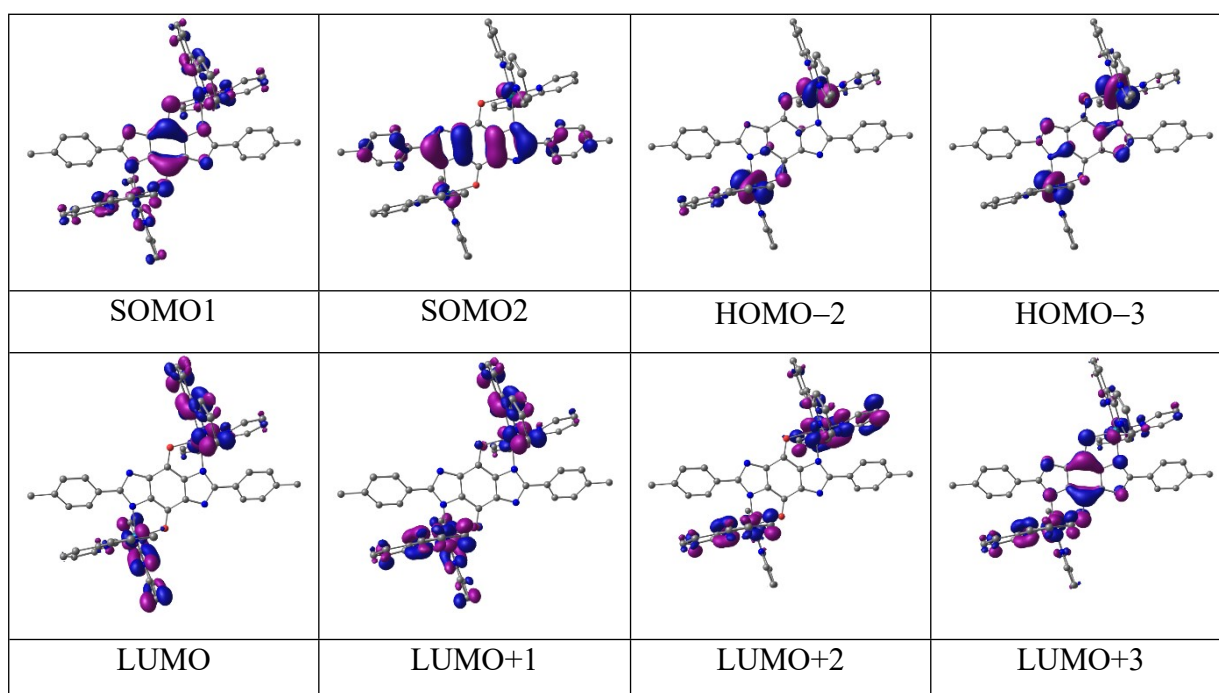

**Table S28** Composition and energies of selected molecular orbitals of [3<sup>-</sup>] (*S*=1/2)

| MO             | Energy(ev) | Composition |     |    |     |
|----------------|------------|-------------|-----|----|-----|
|                |            | Os1         | Os2 | L2 | bpy |
| <i>α</i> -spin |            |             |     |    |     |
| HOMO-5         | -1.623     | 28          | 30  | 19 | 23  |
| HOMO-4         | -1.531     | 11          | 7   | 75 | 7   |
| HOMO-3         | -1.414     | 41          | 28  | 12 | 19  |
| HOMO-2         | -1.390     | 23          | 39  | 24 | 14  |
| HOMO-1         | -0.192     | 2           | 1   | 22 | 74  |
| HOMO           | -0.052     | 6           | 6   | 3  | 85  |
| LUMO           | 0.024      | 14          | 1   | 2  | 83  |
| LUMO+1         | 0.041      | 1           | 13  | 3  | 83  |
| LUMO+2         | 0.287      | 7           | 8   | 58 | 27  |
| LUMO+3         | 0.768      | 2           | 0   | 4  | 94  |
| LUMO+4         | 0.795      | 0           | 2   | 4  | 94  |
| LUMO+5         | 0.986      | 5           | 0   | 2  | 93  |
| <i>β</i> -spin |            |             |     |    |     |
| HOMO-5         | -1.847     | 7           | 56  | 10 | 27  |
| HOMO-4         | -1.568     | 30          | 31  | 16 | 22  |
| HOMO-3         | -1.539     | 9           | 8   | 75 | 7   |
| HOMO-2         | -1.402     | 48          | 21  | 11 | 20  |
| HOMO-1         | -1.368     | 18          | 46  | 21 | 15  |
| HOMO           | -0.223     | 2           | 2   | 61 | 35  |
| LUMO           | 0.128      | 7           | 5   | 3  | 85  |
| LUMO+1         | 0.192      | 7           | 8   | 11 | 75  |
| LUMO+2         | 0.264      | 9           | 3   | 3  | 85  |
| LUMO+3         | 0.319      | 4           | 10  | 11 | 75  |
| LUMO+4         | 0.815      | 3           | 0   | 4  | 93  |
| LUMO+5         | 0.838      | 0           | 3   | 4  | 93  |



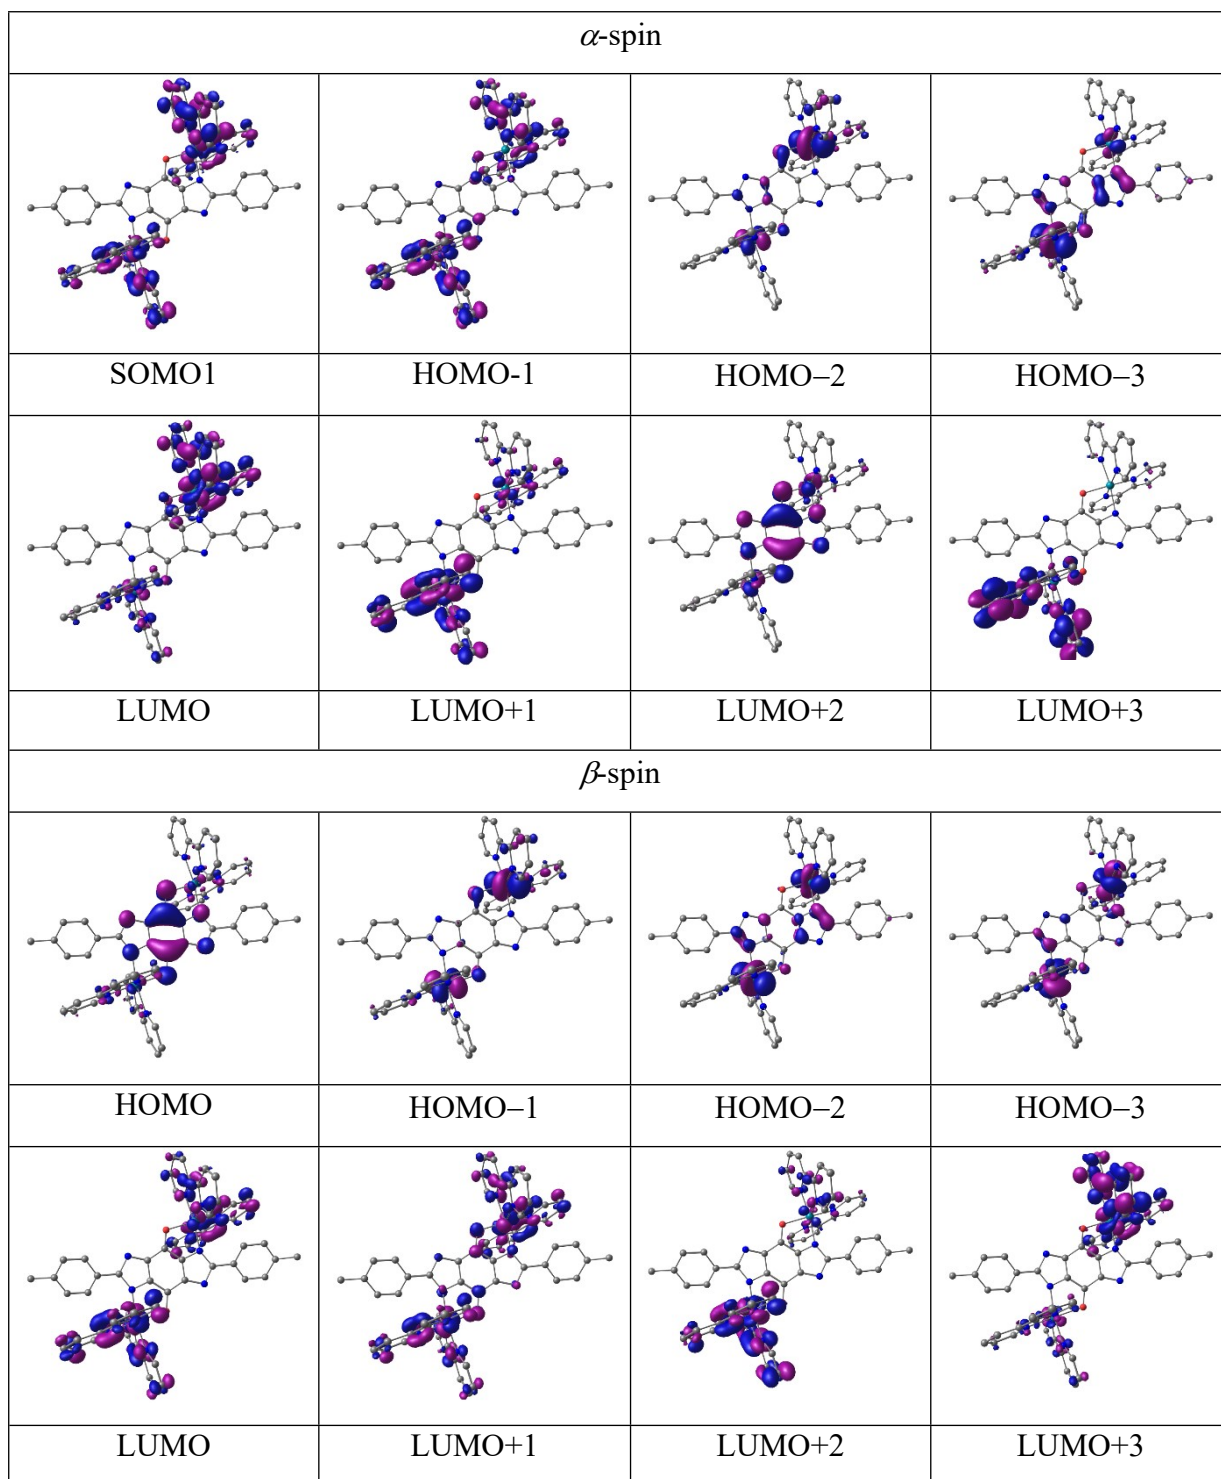

**Table S29** Composition and energies of selected molecular orbitals of [3<sup>2-</sup>] (S=0)

| MO     | Energy(ev) | Composition |     |    |     |
|--------|------------|-------------|-----|----|-----|
|        |            | Os1         | Os2 | L2 | bpy |
| HOMO-5 | 0.667      | 6           | 6   | 80 | 7   |
| HOMO-4 | 0.725      | 30          | 30  | 16 | 23  |
| HOMO-3 | 0.922      | 3           | 67  | 11 | 19  |
| HOMO-2 | 0.937      | 68          | 2   | 12 | 18  |
| HOMO-1 | 2.120      | 1           | 1   | 45 | 53  |
| HOMO   | 2.368      | 6           | 6   | 3  | 85  |
| LUMO   | 2.420      | 0           | 13  | 2  | 85  |
| LUMO+1 | 2.438      | 13          | 0   | 2  | 85  |
| LUMO+2 | 2.554      | 8           | 9   | 36 | 47  |
| LUMO+3 | 3.065      | 0           | 2   | 5  | 93  |
| LUMO+4 | 3.073      | 2           | 0   | 4  | 93  |
| LUMO+5 | 3.269      | 0           | 6   | 4  | 90  |

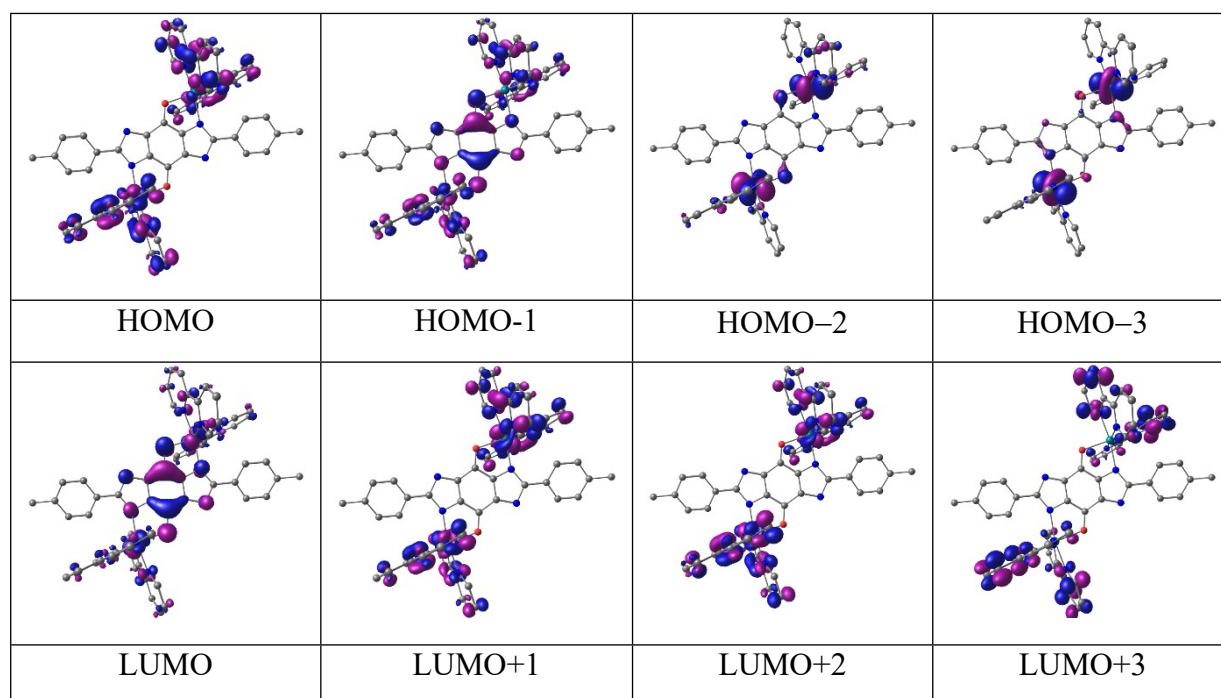

**Table S30** TD-DFT (M06L/CPCM/CH<sub>3</sub>CN) calculated electronic transitions for [1<sup>n</sup>]

| $\lambda/\text{nm}$ (DFT)<br>( <i>f</i> ) | Transitions                                                | Character                                                                                     |
|-------------------------------------------|------------------------------------------------------------|-----------------------------------------------------------------------------------------------|
|                                           | [1 <sup>3+</sup> ] ( <i>S</i> =1/2)                        |                                                                                               |
| 1637(0.008)                               | HOMO-2( $\beta$ ) $\rightarrow$ LUMO( $\beta$ )(0.97)      | Os(d $\pi$ ) $\rightarrow$ Os(d $\pi$ )/L <sub>1</sub> ( $\pi^*$ )                            |
| 1308(0.02)                                | HOMO-3( $\beta$ ) $\rightarrow$ LUMO( $\beta$ )(0.91)      | Os(d $\pi$ )/L <sub>1</sub> ( $\pi$ ) $\rightarrow$ Os(d $\pi$ )/L <sub>1</sub> ( $\pi^*$ )   |
| 767(0.006)                                | HOMO-4( $\beta$ ) $\rightarrow$ LUMO( $\beta$ )(0.74)      | Os(d $\pi$ )/bpy( $\pi$ ) $\rightarrow$ Os(d $\pi$ )/L <sub>1</sub> ( $\pi^*$ )               |
|                                           | HOMO-5( $\beta$ ) $\rightarrow$ LUMO( $\beta$ )(0.43)      | Os(d $\pi$ )/L <sub>1</sub> ( $\pi$ ) $\rightarrow$ Os(d $\pi$ )/L <sub>1</sub> ( $\pi^*$ )   |
|                                           | HOMO-5( $\beta$ ) $\rightarrow$ LUMO( $\beta$ )(0.42)      | L <sub>1</sub> ( $\pi$ ) $\rightarrow$ Os(d $\pi$ )/L <sub>1</sub> ( $\pi^*$ )                |
| 653(0.07)                                 | HOMO( $\beta$ ) $\rightarrow$ LUMO+2( $\beta$ )(0.44)      | Os(d $\pi$ ) $\rightarrow$ bpy( $\pi^*$ )                                                     |
|                                           | HOMO( $\alpha$ ) $\rightarrow$ LUMO+1( $\alpha$ )(0.41)    | L <sub>1</sub> ( $\pi$ )/Os(d $\pi$ ) $\rightarrow$ bpy( $\pi^*$ )                            |
|                                           | HOMO( $\beta$ ) $\rightarrow$ LUMO+1( $\beta$ )(0.37)      | Os(d $\pi$ ) $\rightarrow$ bpy( $\pi^*$ )                                                     |
| 543(0.03)                                 | HOMO-2( $\alpha$ ) $\rightarrow$ LUMO+1( $\alpha$ )(0.42)  | Os(d $\pi$ ) $\rightarrow$ bpy( $\pi^*$ )                                                     |
|                                           | HOMO-2( $\beta$ ) $\rightarrow$ LUMO+2( $\beta$ )(0.39)    | Os(d $\pi$ ) $\rightarrow$ bpy( $\pi^*$ )                                                     |
|                                           | HOMO-2( $\beta$ ) $\rightarrow$ LUMO+1( $\beta$ )(0.33)    | Os(d $\pi$ ) $\rightarrow$ bpy( $\pi^*$ )                                                     |
| 497(0.04)                                 | HOMO( $\beta$ ) $\rightarrow$ LUMO+5( $\beta$ )(0.47)      | Os(d $\pi$ ) $\rightarrow$ bpy( $\pi^*$ )                                                     |
|                                           | HOMO( $\alpha$ ) $\rightarrow$ LUMO+4( $\alpha$ )(0.46)    | L <sub>1</sub> ( $\pi$ )/Os(d $\pi$ ) $\rightarrow$ bpy( $\pi^*$ )/L <sub>1</sub> ( $\pi^*$ ) |
| 473(0.11)                                 | HOMO-2( $\alpha$ ) $\rightarrow$ LUMO+3( $\alpha$ )(0.43)  | Os(d $\pi$ ) $\rightarrow$ bpy( $\pi^*$ )                                                     |
|                                           | HOMO-2( $\beta$ ) $\rightarrow$ LUMO+4( $\beta$ )(0.35)    | Os(d $\pi$ ) $\rightarrow$ bpy( $\pi^*$ )                                                     |
|                                           | HOMO-1( $\alpha$ ) $\rightarrow$ LUMO+5( $\alpha$ )(0.33)  | Os(d $\pi$ ) $\rightarrow$ L <sub>1</sub> ( $\pi^*$ )                                         |
| 444(0.05)                                 | HOMO-2( $\beta$ ) $\rightarrow$ LUMO+6( $\beta$ )(0.41)    | Os(d $\pi$ ) $\rightarrow$ L <sub>1</sub> ( $\pi^*$ )                                         |
|                                           | HOMO-2( $\alpha$ ) $\rightarrow$ LUMO+5( $\alpha$ )(0.40)  | Os(d $\pi$ ) $\rightarrow$ L <sub>1</sub> ( $\pi^*$ )                                         |
|                                           | HOMO-1( $\alpha$ ) $\rightarrow$ LUMO+3( $\alpha$ )(0.33)  | Os(d $\pi$ ) $\rightarrow$ L <sub>1</sub> ( $\pi^*$ )                                         |
| 416(0.04)                                 | HOMO-13( $\beta$ ) $\rightarrow$ LUMO( $\beta$ )(0.41)     | bpy( $\pi$ ) $\rightarrow$ Os(d $\pi$ )/L <sub>1</sub> ( $\pi^*$ )                            |
|                                           | HOMO-16( $\beta$ ) $\rightarrow$ LUMO( $\beta$ )(0.41)     | L <sub>1</sub> ( $\pi$ ) $\rightarrow$ Os(d $\pi$ )/L <sub>1</sub> ( $\pi^*$ )                |
| 392(0.05)                                 | HOMO-3( $\beta$ ) $\rightarrow$ LUMO+4( $\beta$ )(0.65)    | Os(d $\pi$ )/L <sub>1</sub> ( $\pi$ ) $\rightarrow$ bpy( $\pi^*$ )                            |
|                                           | HOMO-3( $\alpha$ ) $\rightarrow$ LUMO+3( $\alpha$ )(0.63)  | Os(d $\pi$ ) $\rightarrow$ L <sub>1</sub> ( $\pi^*$ )                                         |
| 372(0.15)                                 | HOMO-3( $\beta$ ) $\rightarrow$ LUMO+5( $\beta$ )(0.45)    | Os(d $\pi$ )/L <sub>1</sub> ( $\pi$ ) $\rightarrow$ bpy( $\pi^*$ )/L <sub>1</sub> ( $\pi^*$ ) |
|                                           | HOMO-3( $\alpha$ ) $\rightarrow$ LUMO+4( $\alpha$ )(0.39)  | Os(d $\pi$ ) $\rightarrow$ bpy( $\pi^*$ )/L <sub>1</sub> ( $\pi^*$ )                          |
|                                           | HOMO-1( $\beta$ ) $\rightarrow$ LUMO+12( $\beta$ )(0.36)   | Os(d $\pi$ )/L <sub>1</sub> ( $\pi$ ) $\rightarrow$ bpy( $\pi^*$ )                            |
|                                           | HOMO-1( $\alpha$ ) $\rightarrow$ LUMO+11( $\alpha$ )(0.35) | Os(d $\pi$ ) $\rightarrow$ bpy( $\pi^*$ )                                                     |

|              |                                                           |                                                                                                                  |
|--------------|-----------------------------------------------------------|------------------------------------------------------------------------------------------------------------------|
| 369(0.28)    | HOMO-3( $\alpha$ ) $\rightarrow$ LUMO+5( $\alpha$ )(0.45) | Os(d $\pi$ ) $\rightarrow$ L <sub>1</sub> ( $\pi^*$ )                                                            |
|              | HOMO-3( $\beta$ ) $\rightarrow$ LUMO+6( $\beta$ )(0.44)   | Os(d $\pi$ )/L <sub>1</sub> ( $\pi$ ) $\rightarrow$ L <sub>1</sub> ( $\pi^*$ )                                   |
|              | [1 <sup>2+</sup> ] (S=0)                                  |                                                                                                                  |
| 699(0.03)    | HOMO-1 $\rightarrow$ LUMO+2(0.68)                         | Os(d $\pi$ )/bpy( $\pi$ )/L <sub>1</sub> ( $\pi$ ) $\rightarrow$ bpy( $\pi^*$ )                                  |
| 636(0.10)    | HOMO-2 $\rightarrow$ LUMO(0.63)                           | Os(d $\pi$ )/bpy( $\pi$ )/L <sub>1</sub> ( $\pi$ ) $\rightarrow$ bpy( $\pi^*$ )                                  |
| 513(0.05)    | HOMO-6 $\rightarrow$ LUMO(0.58)                           | L <sub>1</sub> ( $\pi$ )/bpy( $\pi$ )/Os(d $\pi$ ) $\rightarrow$ bpy( $\pi^*$ )                                  |
| 508(0.01)    | HOMO-6 $\rightarrow$ LUMO+1(0.59)                         | L <sub>1</sub> ( $\pi$ )/bpy( $\pi$ )/Os(d $\pi$ ) $\rightarrow$ bpy( $\pi^*$ )                                  |
| 470(0.02)    | HOMO-6 $\rightarrow$ LUMO+3(0.62)                         | L <sub>1</sub> ( $\pi$ )/bpy( $\pi$ )/Os(d $\pi$ ) $\rightarrow$ bpy( $\pi^*$ )                                  |
| 461(0.06)    | HOMO-4 $\rightarrow$ LUMO+5(0.52)                         | Os(d $\pi$ )/L <sub>1</sub> ( $\pi$ )/bpy( $\pi$ ) $\rightarrow$ bpy( $\pi^*$ )/<br>L <sub>1</sub> ( $\pi^*$ )   |
|              | HOMO $\rightarrow$ LUMO+9(0.41)                           | Os(d $\pi$ )/bpy( $\pi$ )/L <sub>1</sub> ( $\pi$ ) $\rightarrow$ bpy( $\pi^*$ )/L-<br>L <sub>1</sub> ( $\pi^*$ ) |
| 408(0.13)    | HOMO-5 $\rightarrow$ LUMO+8(0.42)                         | Os(d $\pi$ )/bpy( $\pi$ )/L <sub>1</sub> ( $\pi$ ) $\rightarrow$ bpy( $\pi^*$ )                                  |
|              | HOMO-3 $\rightarrow$ LUMO+9(0.39)                         | Os(d $\pi$ )/bpy( $\pi$ )/L <sub>1</sub> ( $\pi$ ) $\rightarrow$ bpy( $\pi^*$ )/L-<br>L <sub>1</sub> ( $\pi^*$ ) |
| 391(0.04)    | HOMO-5 $\rightarrow$ LUMO+12(0.40)                        | Os(d $\pi$ )/bpy( $\pi$ )/L <sub>1</sub> ( $\pi$ ) $\rightarrow$ bpy( $\pi^*$ )/L-<br>L <sub>1</sub> ( $\pi^*$ ) |
|              | HOMO-3 $\rightarrow$ LUMO+11(0.24)                        | Os(d $\pi$ )/bpy( $\pi$ )/L <sub>1</sub> ( $\pi$ ) $\rightarrow$ bpy( $\pi^*$ )                                  |
| 348(0.09)    | HOMO-11 $\rightarrow$ LUMO(0.60)                          | L <sub>1</sub> ( $\pi$ ) $\rightarrow$ bpy( $\pi^*$ )                                                            |
| 332(0.15)    | HOMO-6 $\rightarrow$ LUMO+15(0.61)                        | L <sub>1</sub> ( $\pi$ )/Os(d $\pi$ )/bpy( $\pi$ ) $\rightarrow$ L <sub>1</sub> ( $\pi^*$ )                      |
|              | [1 <sup>+</sup> ] (S=1/2)                                 |                                                                                                                  |
| 1856(0.006)  | HOMO( $\alpha$ ) $\rightarrow$ LUMO+4( $\alpha$ )(0.99)   | bpy( $\pi$ ) $\rightarrow$ L <sub>1</sub> ( $\pi^*$ )                                                            |
| 1333(0.0006) | HOMO( $\alpha$ ) $\rightarrow$ LUMO+5( $\alpha$ )(0.99)   | bpy( $\pi$ ) $\rightarrow$ bpy( $\pi^*$ )/L <sub>1</sub> ( $\pi^*$ )                                             |
| 1266(0.001)  | HOMO( $\alpha$ ) $\rightarrow$ LUMO+6( $\alpha$ )(0.99)   | bpy( $\pi$ ) $\rightarrow$ bpy( $\pi^*$ )                                                                        |
| 1026(0.003)  | HOMO( $\alpha$ ) $\rightarrow$ LUMO+8( $\alpha$ )(0.99)   | bpy( $\pi$ ) $\rightarrow$ bpy( $\pi^*$ )                                                                        |
| 936(0.004)   | HOMO( $\alpha$ ) $\rightarrow$ LUMO+12( $\alpha$ )(0.99)  | bpy( $\pi$ ) $\rightarrow$ bpy( $\pi^*$ )/L <sub>1</sub> ( $\pi^*$ )                                             |
| 780(0.011)   | HOMO-1( $\beta$ ) $\rightarrow$ LUMO( $\beta$ )(0.90)     | Os(d $\pi$ ) $\rightarrow$ bpy( $\pi^*$ )                                                                        |
| 689(0.009)   | HOMO-1( $\beta$ ) $\rightarrow$ LUMO+2( $\beta$ )(0.85)   | Os(d $\pi$ ) $\rightarrow$ bpy( $\pi^*$ )                                                                        |
| 634(0.05)    | HOMO-1( $\beta$ ) $\rightarrow$ LUMO+4( $\beta$ )(0.49)   | Os(d $\pi$ ) $\rightarrow$ L <sub>1</sub> ( $\pi^*$ )/bpy( $\pi^*$ )                                             |
| 585(0.04)    | HOMO-2( $\beta$ ) $\rightarrow$ LUMO+2( $\beta$ )(0.87)   | Os(d $\pi$ )/bpy( $\pi$ ) $\rightarrow$ bpy( $\pi^*$ )                                                           |
| 531(0.08)    | HOMO-2( $\beta$ ) $\rightarrow$ LUMO+4( $\beta$ )(0.45)   | Os(d $\pi$ )/bpy( $\pi$ ) $\rightarrow$ L <sub>1</sub> ( $\pi^*$ )/bpy( $\pi^*$ )                                |

|             |                                                            |                                                       |
|-------------|------------------------------------------------------------|-------------------------------------------------------|
|             | HOMO-6( $\beta$ ) $\rightarrow$ LUMO+1( $\beta$ )(0.39)    | $L_1(\pi)/Os(d\pi) \rightarrow bpy(\pi^*)$            |
| 472(0.04)   | HOMO-6( $\beta$ ) $\rightarrow$ LUMO+3( $\beta$ )(0.62)    | $L_1(\pi)/Os(d\pi) \rightarrow bpy(\pi^*)$            |
|             | HOMO-7( $\beta$ ) $\rightarrow$ LUMO+1( $\beta$ )(0.41)    | $L_1(\pi) \rightarrow bpy(\pi^*)$                     |
|             | [1] ( $S=1$ )                                              |                                                       |
| 1979(0.004) | HOMO( $\alpha$ ) $\rightarrow$ LUMO+3( $\alpha$ )(0.98)    | $bpy(\pi) \rightarrow L_1(\pi^*)$                     |
| 1889(0.004) | HOMO-1( $\alpha$ ) $\rightarrow$ LUMO+3( $\alpha$ )(0.99)  | $bpy(\pi) \rightarrow L_1(\pi^*)$                     |
| 1353(0.004) | HOMO( $\alpha$ ) $\rightarrow$ LUMO+4( $\alpha$ )(0.99)    | $bpy(\pi) \rightarrow L_1(\pi^*)/bpy(\pi^*)$          |
| 1110(0.001) | HOMO( $\alpha$ ) $\rightarrow$ LUMO+6( $\alpha$ )(0.80)    | $bpy(\pi) \rightarrow bpy(\pi^*)/L_1(\pi^*)$          |
|             | HOMO-1( $\alpha$ ) $\rightarrow$ LUMO+5( $\alpha$ )(0.57)  | $bpy(\pi) \rightarrow bpy(\pi^*)$                     |
| 891(0.007)  | HOMO( $\alpha$ ) $\rightarrow$ LUMO+12( $\alpha$ )(0.97)   | $bpy(\pi) \rightarrow bpy(\pi^*)/L_1(\pi^*)$          |
| 781(0.04)   | HOMO( $\beta$ ) $\rightarrow$ LUMO( $\beta$ )(0.80)        | $Os(d\pi) \rightarrow bpy(\pi^*)/L_1(\pi^*)$          |
| 654(0.03)   | HOMO-2( $\beta$ ) $\rightarrow$ LUMO( $\beta$ )(0.65)      | $Os(d\pi)/bpy(\pi) \rightarrow bpy(\pi^*)/L_1(\pi^*)$ |
| 530(0.04)   | HOMO-3( $\beta$ ) $\rightarrow$ LUMO+3( $\beta$ )(0.46)    | $Os(d\pi)/bpy(\pi) \rightarrow bpy(\pi^*)$            |
| 500(0.09)   | HOMO-5( $\beta$ ) $\rightarrow$ LUMO+4( $\beta$ )(0.54)    | $Os(d\pi)/bpy(\pi) \rightarrow L_1(\pi^*)/bpy(\pi^*)$ |
| 421(0.06)   | HOMO-1( $\beta$ ) $\rightarrow$ LUMO+16( $\beta$ )(0.65)   | $Os(d\pi) \rightarrow bpy(\pi^*)$                     |
|             | 1- ( $S=1/2$ )                                             |                                                       |
| 1864(0.02)  | HOMO( $\beta$ ) $\rightarrow$ LUMO+4( $\beta$ )(0.74)      | $bpy(\pi) \rightarrow bpy(\pi^*)/L_1(\pi^*)$          |
| 1841(0.02)  | HOMO( $\beta$ ) $\rightarrow$ LUMO+4( $\beta$ )(0.54)      | $bpy(\pi) \rightarrow bpy(\pi^*)/L_1(\pi^*)$          |
| 1625(0.003) | HOMO-1( $\alpha$ ) $\rightarrow$ LUMO+3( $\alpha$ )(0.95)  | $bpy(\pi) \rightarrow L_1(\pi^*)/bpy(\pi^*)$          |
| 1344(0.006) | HOMO( $\alpha$ ) $\rightarrow$ LUMO+5( $\alpha$ )(0.92)    | $bpy(\pi) \rightarrow L_1(\pi^*)/bpy(\pi^*)$          |
| 1226(0.003) | HOMO-1( $\alpha$ ) $\rightarrow$ LUMO+4( $\alpha$ )(0.99)  | $bpy(\pi) \rightarrow L_1(\pi^*)/bpy(\pi^*)$          |
| 840(0.007)  | HOMO-1( $\alpha$ ) $\rightarrow$ LUMO+11( $\alpha$ )(0.98) | $bpy(\pi) \rightarrow bpy(\pi^*)$                     |
| 771(0.01)   | HOMO-2( $\alpha$ ) $\rightarrow$ LUMO+1( $\alpha$ )(0.73)  | $Os(d\pi) \rightarrow bpy(\pi^*)$                     |
| 643(0.03)   | HOMO-1( $\beta$ ) $\rightarrow$ LUMO+3( $\beta$ )(0.61)    | $Os(d\pi) \rightarrow bpy(\pi^*)$                     |
| 535(0.05)   | HOMO-4( $\beta$ ) $\rightarrow$ LUMO+3( $\beta$ )(0.52)    | $Os(d\pi)/bpy(\pi) \rightarrow bpy(\pi^*)$            |
| 465(0.06)   | HOMO( $\beta$ ) $\rightarrow$ LUMO+4( $\beta$ )(0.54)      | $bpy(\pi) \rightarrow bpy(\pi^*)/L_1(\pi^*)$          |
| 425(0.04)   | HOMO-4( $\alpha$ ) $\rightarrow$ LUMO+16( $\alpha$ )(0.48) | $Os(d\pi) \rightarrow bpy(\pi^*)$                     |
|             | [1 <sup>2-</sup> ] ( $S=0$ )                               |                                                       |
| 1720(0.02)  | HOMO $\rightarrow$ LUMO+3(0.64)                            | $bpy(\pi) \rightarrow L_1(\pi^*)/bpy(\pi^*)$          |
| 1324(0.04)  | HOMO-1 $\rightarrow$ LUMO+5(0.53)                          | $bpy(\pi) \rightarrow L_1(\pi^*)/bpy(\pi^*)$          |
|             | HOMO-1 $\rightarrow$ LUMO+3(0.30)                          | $bpy(\pi) \rightarrow L_1(\pi^*)/bpy(\pi^*)$          |

|            |                     |                                                                    |
|------------|---------------------|--------------------------------------------------------------------|
| 1247(0.07) | HOMO-1→LUMO+5(0.33) | bpy( $\pi$ )→L <sub>1</sub> ( $\pi^*$ )/bpy( $\pi^*$ )             |
|            | HOMO-1→LUMO+2(0.31) | bpy( $\pi$ )→L <sub>1</sub> ( $\pi^*$ )                            |
| 785(0.04)  | HOMO-2→LUMO(0.66)   | Os(d $\pi$ )→bpy( $\pi^*$ )                                        |
| 654(0.05)  | HOMO-4→LUMO(0.46)   | Os(d $\pi$ )/bpy( $\pi$ )→bpy( $\pi^*$ )                           |
| 546(0.08)  | HOMO-5→LUMO+1(0.44) | Os(d $\pi$ )/bpy( $\pi$ )→bpy( $\pi^*$ )                           |
| 486(0.10)  | HOMO-7→LUMO+2(0.40) | Os(d $\pi$ )/bpy( $\pi$ )→L <sub>1</sub> ( $\pi^*$ )               |
| 363(0.22)  | HOMO-8→LUMO+5(0.60) | L <sub>1</sub> ( $\pi$ )→L <sub>1</sub> ( $\pi^*$ )/bpy( $\pi^*$ ) |

**Table S31** TD-DFT (M06L/CPCM/CH<sub>3</sub>CN) calculated electronic transitions for [2<sup>n</sup>]

| $\lambda/\text{nm}$ (DFT)<br>( <i>f</i> ) | Transitions                                             | Character                                                                                                  |
|-------------------------------------------|---------------------------------------------------------|------------------------------------------------------------------------------------------------------------|
|                                           | [2 <sup>3+</sup> ] ( <i>S</i> =1/2)                     |                                                                                                            |
| 1593(0.01)                                | HOMO-5( $\beta$ ) $\rightarrow$ LUMO( $\beta$ )(0.97)   | Os( $d\pi$ )/bpy( $\pi$ ) $\rightarrow$ Os( $d\pi$ )/L <sub>1</sub> ( $\pi^*$ )                            |
| 906(0.006)                                | HOMO-7( $\beta$ ) $\rightarrow$ LUMO( $\beta$ )(0.98)   | L <sub>1</sub> ( $\pi$ ) $\rightarrow$ Os( $d\pi$ )/L <sub>1</sub> ( $\pi^*$ )                             |
| 881(0.004)                                | HOMO-8( $\beta$ ) $\rightarrow$ LUMO( $\beta$ )(0.98)   | L <sub>1</sub> ( $\pi$ ) $\rightarrow$ Os( $d\pi$ )/L <sub>1</sub> ( $\pi^*$ )                             |
| 753(0.008)                                | HOMO( $\beta$ ) $\rightarrow$ LUMO+1( $\beta$ )(0.98)   | Os( $d\pi$ ) $\rightarrow$ bpy( $\pi^*$ )                                                                  |
| 538(0.02)                                 | HOMO-5( $\beta$ ) $\rightarrow$ LUMO+1( $\beta$ )(0.72) | Os( $d\pi$ )/bpy( $\pi$ ) $\rightarrow$ bpy( $\pi^*$ )                                                     |
| 472(0.04)                                 | HOMO( $\alpha$ ) $\rightarrow$ LUMO+5( $\alpha$ )(0.42) | L <sub>1</sub> ( $\pi$ ) $\rightarrow$ bpy( $\pi^*$ )                                                      |
| 412(0.06)                                 | HOMO-5( $\beta$ ) $\rightarrow$ LUMO+6( $\beta$ )(0.54) | Os( $d\pi$ )/bpy( $\pi$ ) $\rightarrow$ bpy( $\pi^*$ )                                                     |
|                                           | [2 <sup>2+</sup> ] ( <i>S</i> =0)                       |                                                                                                            |
| 636(0.04)                                 | HOMO-3 $\rightarrow$ LUMO(0.58)                         | Os( $d\pi$ )/L <sub>1</sub> ( $\pi$ ) $\rightarrow$ bpy( $\pi^*$ )                                         |
| 500(0.02)                                 | HOMO-6 $\rightarrow$ LUMO+1(0.32)                       | Os( $d\pi$ )/bpy( $\pi$ )/L <sub>1</sub> ( $\pi$ ) $\rightarrow$ bpy( $\pi^*$ )                            |
|                                           | HOMO-5 $\rightarrow$ LUMO+2(0.21)                       | Os( $d\pi$ )/L <sub>1</sub> ( $\pi$ ) $\rightarrow$ bpy( $\pi^*$ )                                         |
|                                           | HOMO $\rightarrow$ LUMO+6(0.21)                         | Os( $d\pi$ )/L <sub>1</sub> ( $\pi$ ) $\rightarrow$ bpy( $\pi^*$ )                                         |
| 497(0.04)                                 | HOMO-6 $\rightarrow$ LUMO+1(0.49)                       | Os( $d\pi$ )/bpy( $\pi$ )/L <sub>1</sub> ( $\pi$ ) $\rightarrow$ bpy( $\pi^*$ )                            |
|                                           | HOMO-6 $\rightarrow$ LUMO+2(0.21)                       | Os( $d\pi$ )/bpy( $\pi$ )/L <sub>1</sub> ( $\pi$ ) $\rightarrow$ bpy( $\pi^*$ )                            |
|                                           | HOMO-6 $\rightarrow$ LUMO+3(0.22)                       | Os( $d\pi$ )/bpy( $\pi$ )/L <sub>1</sub> ( $\pi$ ) $\rightarrow$ bpy( $\pi^*$ )                            |
| 459(0.02)                                 | HOMO-6 $\rightarrow$ LUMO+4(0.20)                       | Os( $d\pi$ )/bpy( $\pi$ )/L <sub>1</sub> ( $\pi$ ) $\rightarrow$ bpy( $\pi^*$ )/L <sub>1</sub> ( $\pi^*$ ) |
|                                           | HOMO-4 $\rightarrow$ LUMO+5(0.50)                       | Os( $d\pi$ ) $\rightarrow$ L <sub>1</sub> ( $\pi^*$ )/bpy( $\pi^*$ )                                       |
| 401(0.07)                                 | HOMO-3 $\rightarrow$ LUMO+10(0.31)                      | Os( $d\pi$ )/L <sub>1</sub> ( $\pi$ ) $\rightarrow$ bpy( $\pi^*$ )                                         |
| 400(0.05)                                 | HOMO-6 $\rightarrow$ LUMO+5(0.26)                       | Os( $d\pi$ )/bpy( $\pi$ )/L <sub>1</sub> ( $\pi$ ) $\rightarrow$ L <sub>1</sub> ( $\pi^*$ )/bpy( $\pi^*$ ) |
|                                           | HOMO-1 $\rightarrow$ LUMO+16(0.63)                      | L <sub>1</sub> ( $\pi$ ) $\rightarrow$ L <sub>1</sub> ( $\pi^*$ )                                          |
| 353(0.10)                                 | HOMO-11 $\rightarrow$ LUMO(0.55)                        | L <sub>1</sub> ( $\pi$ ) $\rightarrow$ bpy( $\pi^*$ )                                                      |
| 346(0.06)                                 | HOMO-3 $\rightarrow$ LUMO+13(0.48)                      | Os( $d\pi$ )/bpy( $\pi$ )/L <sub>1</sub> ( $\pi$ ) $\rightarrow$ bpy( $\pi^*$ )/L <sub>1</sub> ( $\pi^*$ ) |
| 330(0.08)                                 | HOMO-3 $\rightarrow$ LUMO+15(0.55)                      | Os( $d\pi$ )/bpy( $\pi$ )/L <sub>1</sub> ( $\pi$ ) $\rightarrow$ L <sub>1</sub> ( $\pi^*$ )                |

|             |                                                           |                                                                      |
|-------------|-----------------------------------------------------------|----------------------------------------------------------------------|
|             | [2 <sup>+</sup> ] (S=1/2)                                 |                                                                      |
| 1276(0.009) | HOMO( $\alpha$ ) $\rightarrow$ LUMO+5( $\alpha$ )(0.99)   | bpy( $\pi$ ) $\rightarrow$ L <sub>1</sub> ( $\pi^*$ )/bpy( $\pi^*$ ) |
| 959(0.003)  | HOMO( $\alpha$ ) $\rightarrow$ LUMO+10( $\alpha$ )(0.97)  | bpy( $\pi$ ) $\rightarrow$ bpy( $\pi^*$ )                            |
| 770(0.004)  | HOMO-1( $\beta$ ) $\rightarrow$ LUMO( $\beta$ )(0.55)     | Os(d $\pi$ ) $\rightarrow$ bpy( $\pi^*$ )                            |
|             | HOMO-1( $\alpha$ ) $\rightarrow$ LUMO+1( $\alpha$ )(0.54) | Os(d $\pi$ )/L <sub>1</sub> ( $\pi$ ) $\rightarrow$ bpy( $\pi^*$ )   |
|             | HOMO-2( $\alpha$ ) $\rightarrow$ LUMO( $\alpha$ )(0.52)   | Os(d $\pi$ ) $\rightarrow$ bpy( $\pi^*$ )                            |
| 570(0.02)   | HOMO( $\beta$ ) $\rightarrow$ LUMO+5( $\beta$ )(0.65)     | Os(d $\pi$ )/L <sub>1</sub> ( $\pi$ ) $\rightarrow$ bpy( $\pi^*$ )   |
|             | HOMO-1( $\alpha$ ) $\rightarrow$ LUMO+4( $\alpha$ )(0.38) | Os(d $\pi$ )/L <sub>1</sub> ( $\pi$ ) $\rightarrow$ bpy( $\pi^*$ )   |
| 493(0.04)   | HOMO-6( $\beta$ ) $\rightarrow$ LUMO+2( $\beta$ )(0.32)   | Os(d $\pi$ )/bpy( $\pi$ ) $\rightarrow$ bpy( $\pi^*$ )               |
| 407(0.05)   | HOMO-6( $\alpha$ ) $\rightarrow$ LUMO+6( $\alpha$ )(0.34) | L <sub>1</sub> ( $\pi$ ) $\rightarrow$ bpy( $\pi^*$ )                |
|             | HOMO-5( $\beta$ ) $\rightarrow$ LUMO+7( $\beta$ )(0.31)   | L <sub>1</sub> ( $\pi$ ) $\rightarrow$ bpy( $\pi^*$ )                |
|             | [2] (S=1)                                                 |                                                                      |
| 1977(0.03)  | HOMO( $\alpha$ ) $\rightarrow$ LUMO+3( $\alpha$ )(0.62)   | bpy( $\pi$ ) $\rightarrow$ L <sub>1</sub> ( $\pi^*$ )                |
|             | HOMO( $\alpha$ ) $\rightarrow$ LUMO+2( $\alpha$ )(0.36)   | bpy( $\pi$ ) $\rightarrow$ L <sub>1</sub> ( $\pi^*$ )                |
| 1713(0.01)  | HOMO-1( $\alpha$ ) $\rightarrow$ LUMO+3( $\alpha$ )(0.94) | bpy( $\pi$ ) $\rightarrow$ L <sub>1</sub> ( $\pi^*$ )                |
| 1418(0.004) | HOMO( $\alpha$ ) $\rightarrow$ LUMO+4( $\alpha$ )(0.99)   | bpy( $\pi$ ) $\rightarrow$ L <sub>1</sub> ( $\pi^*$ )/bpy( $\pi^*$ ) |
| 1268(0.004) | HOMO-1( $\alpha$ ) $\rightarrow$ LUMO+4( $\alpha$ )(0.99) | bpy( $\pi$ ) $\rightarrow$ L <sub>1</sub> ( $\pi^*$ )/bpy( $\pi^*$ ) |
| 1142(0.004) | HOMO( $\alpha$ ) $\rightarrow$ LUMO+6( $\alpha$ )(0.92)   | bpy( $\pi$ ) $\rightarrow$ bpy( $\pi^*$ )/L <sub>1</sub> ( $\pi^*$ ) |
| 812(0.01)   | HOMO( $\beta$ ) $\rightarrow$ LUMO( $\beta$ )(0.83)       | Os(d $\pi$ ) $\rightarrow$ bpy( $\pi^*$ )/L <sub>1</sub> ( $\pi^*$ ) |
| 683(0.05)   | HOMO-2( $\beta$ ) $\rightarrow$ LUMO( $\beta$ )(0.80)     | Os(d $\pi$ )/bpy( $\pi$ ) $\rightarrow$ bpy( $\pi^*$ )               |
|             | HOMO-6( $\alpha$ ) $\rightarrow$ LUMO+6( $\alpha$ )(0.44) | L <sub>1</sub> ( $\pi$ ) $\rightarrow$ bpy( $\pi^*$ )                |
| 566(0.04)   | HOMO-4( $\beta$ ) $\rightarrow$ LUMO+2( $\beta$ )(0.62)   | Os(d $\pi$ )/L <sub>1</sub> ( $\pi$ ) $\rightarrow$ bpy( $\pi^*$ )   |
|             | HOMO-5( $\beta$ ) $\rightarrow$ LUMO+1( $\beta$ )(0.49)   | Os(d $\pi$ )/bpy( $\pi$ ) $\rightarrow$ bpy( $\pi^*$ )               |
| 468(0.04)   | HOMO( $\alpha$ ) $\rightarrow$ LUMO+16( $\alpha$ )(0.76)  | bpy( $\pi$ ) $\rightarrow$ bpy( $\pi^*$ )                            |
|             | [2 <sup>-</sup> ] (S=1/2)                                 |                                                                      |
| 1970(0.01)  | HOMO( $\alpha$ ) $\rightarrow$ LUMO+3( $\alpha$ )(0.82)   | bpy( $\pi$ ) $\rightarrow$ L <sub>1</sub> ( $\pi^*$ )                |
| 1813(0.02)  | HOMO-1( $\alpha$ ) $\rightarrow$ LUMO+3( $\alpha$ )(0.69) | bpy( $\pi$ ) $\rightarrow$ L <sub>1</sub> ( $\pi^*$ )                |
| 1557(0.04)  | HOMO( $\beta$ ) $\rightarrow$ LUMO+3( $\beta$ )(0.63)     | bpy( $\pi$ ) $\rightarrow$ bpy( $\pi^*$ )/L <sub>1</sub> ( $\pi^*$ ) |
|             | HOMO-1( $\alpha$ ) $\rightarrow$ LUMO( $\alpha$ )(0.38)   | bpy( $\pi$ ) $\rightarrow$ bpy( $\pi^*$ )                            |
| 1282(0.009) | HOMO-1( $\alpha$ ) $\rightarrow$ LUMO+4( $\alpha$ )(0.94) | bpy( $\pi$ ) $\rightarrow$ L <sub>1</sub> ( $\pi^*$ )/bpy( $\pi^*$ ) |
| 1105(0.005) | HOMO( $\alpha$ ) $\rightarrow$ LUMO+5( $\alpha$ )(0.81)   | bpy( $\pi$ ) $\rightarrow$ bpy( $\pi^*$ )/L <sub>1</sub> ( $\pi^*$ ) |



|            |                                                           |                                                                                   |
|------------|-----------------------------------------------------------|-----------------------------------------------------------------------------------|
| 806(0.006) | HOMO-1( $\beta$ ) $\rightarrow$ LUMO( $\beta$ )(0.87)     | Os(d $\pi$ ) $\rightarrow$ bpy( $\pi^*$ )                                         |
| 680(0.02)  | HOMO-1( $\beta$ ) $\rightarrow$ LUMO+2( $\beta$ )(0.55)   | Os(d $\pi$ ) $\rightarrow$ bpy( $\pi^*$ )/L <sub>1</sub> ( $\pi^*$ )              |
|            | HOMO-2( $\alpha$ ) $\rightarrow$ LUMO+2( $\alpha$ )(0.51) | Os(d $\pi$ ) $\rightarrow$ bpy( $\pi^*$ )                                         |
| 579(0.04)  | HOMO-3( $\beta$ ) $\rightarrow$ LUMO+2( $\beta$ )(0.46)   | Os(d $\pi$ )/bpy( $\pi$ ) $\rightarrow$ bpy( $\pi^*$ )/L <sub>1</sub> ( $\pi^*$ ) |
|            | HOMO-5( $\alpha$ ) $\rightarrow$ LUMO+2( $\alpha$ )(0.40) | Os(d $\pi$ )/bpy( $\pi$ ) $\rightarrow$ bpy( $\pi^*$ )                            |
| 421(0.03)  | HOMO-3( $\beta$ ) $\rightarrow$ LUMO+9( $\beta$ )(0.36)   | Os(d $\pi$ )/bpy( $\pi$ ) $\rightarrow$ bpy( $\pi^*$ )/L <sub>1</sub> ( $\pi^*$ ) |
|            | [2 <sup>2-</sup> ] (S=0)                                  |                                                                                   |
| 1850(0.03) | HOMO $\rightarrow$ LUMO+2(0.60)                           | bpy( $\pi$ ) $\rightarrow$ bpy( $\pi^*$ )/L <sub>1</sub> ( $\pi^*$ )              |
| 1534(0.01) | HOMO $\rightarrow$ LUMO+3(0.51)                           | bpy( $\pi$ ) $\rightarrow$ bpy( $\pi^*$ )/L <sub>1</sub> ( $\pi^*$ )              |
|            | HOMO-1 $\rightarrow$ LUMO+3(0.42)                         | bpy( $\pi$ ) $\rightarrow$ bpy( $\pi^*$ )/L <sub>1</sub> ( $\pi^*$ )              |
| 1329(0.06) | HOMO-1 $\rightarrow$ LUMO+2(0.57)                         | bpy( $\pi$ ) $\rightarrow$ bpy( $\pi^*$ )/L <sub>1</sub> ( $\pi^*$ )              |
| 1241(0.10) | HOMO-1 $\rightarrow$ LUMO+3(0.52)                         | bpy( $\pi$ ) $\rightarrow$ bpy( $\pi^*$ )/L <sub>1</sub> ( $\pi^*$ )              |
| 1012(0.01) | HOMO-1 $\rightarrow$ LUMO+4(0.46)                         | bpy( $\pi$ ) $\rightarrow$ L <sub>1</sub> ( $\pi^*$ )/bpy( $\pi^*$ )              |
|            | HOMO $\rightarrow$ LUMO+6(0.45)                           | bpy( $\pi$ ) $\rightarrow$ L <sub>1</sub> ( $\pi^*$ )/bpy( $\pi^*$ )              |
| 725(0.03)  | HOMO $\rightarrow$ LUMO+14(0.35)                          | bpy( $\pi$ ) $\rightarrow$ bpy( $\pi^*$ )                                         |
| 599(0.07)  | HOMO-4 $\rightarrow$ LUMO(0.57)                           | Os(d $\pi$ ) $\rightarrow$ L <sub>1</sub> ( $\pi^*$ )                             |
| 464(0.16)  | HOMO-5 $\rightarrow$ LUMO+2(0.38)                         | Os(d $\pi$ ) $\rightarrow$ bpy( $\pi^*$ )/L <sub>1</sub> ( $\pi^*$ )              |
| 376(0.26)  | HOMO-5 $\rightarrow$ LUMO+1(0.39)                         | L <sub>1</sub> ( $\pi$ ) $\rightarrow$ L <sub>1</sub> ( $\pi^*$ )/bpy( $\pi^*$ )  |

**Table S32** TD-DFT (M06L/CPCM/CH<sub>3</sub>CN) calculated electronic transitions for [3<sup>n</sup>]

| $\lambda/\text{nm}$ (DFT)<br>( $f$ ) <sup>c</sup> | Transitions                                               | Character                                                                      |
|---------------------------------------------------|-----------------------------------------------------------|--------------------------------------------------------------------------------|
|                                                   | [3 <sup>4+</sup> ]( $S=1$ )                               |                                                                                |
| 1568(0.06)                                        | HOMO-4( $\beta$ ) $\rightarrow$ LUMO+1( $\beta$ )(0.91)   | L( $\pi$ )/Os(d $\pi$ ) $\rightarrow$ L <sub>2</sub> ( $\pi^*$ )/Os(d $\pi$ )  |
| 1017(0.41)                                        | HOMO-5( $\beta$ ) $\rightarrow$ LUMO( $\beta$ )(0.97)     | Os(d $\pi$ ) $\rightarrow$ Os(d $\pi$ )                                        |
| 912(0.01)                                         | HOMO-2( $\beta$ ) $\rightarrow$ LUMO+2( $\beta$ )(0.93)   | Os(d $\pi$ )/bpy( $\pi$ ) $\rightarrow$ L <sub>2</sub> ( $\pi^*$ )             |
| 818(0.13)                                         | HOMO-5( $\alpha$ ) $\rightarrow$ LUMO( $\alpha$ )(0.53)   | L <sub>2</sub> ( $\pi$ ) $\rightarrow$ L <sub>2</sub> ( $\pi^*$ )              |
| 767(0.28)                                         | HOMO-5( $\alpha$ ) $\rightarrow$ LUMO( $\alpha$ )(0.68)   | L <sub>2</sub> ( $\pi$ ) $\rightarrow$ L <sub>2</sub> ( $\pi^*$ )              |
|                                                   | SOMO2( $\alpha$ ) $\rightarrow$ LUMO( $\alpha$ )(0.47)    | L <sub>2</sub> ( $\pi$ )/Os(d $\pi$ ) $\rightarrow$ L <sub>2</sub> ( $\pi^*$ ) |
| 668(0.02)                                         | HOMO-12( $\beta$ ) $\rightarrow$ LUMO+1( $\beta$ )(0.99)  | bpy( $\pi$ ) $\rightarrow$ L <sub>2</sub> ( $\pi^*$ )/Os(d $\pi$ )             |
| 619(0.23)                                         | HOMO-7( $\alpha$ ) $\rightarrow$ LUMO( $\alpha$ )(0.83)   | Os(d $\pi$ ) $\rightarrow$ L <sub>2</sub> ( $\pi^*$ )                          |
|                                                   | HOMO-5( $\beta$ ) $\rightarrow$ LUMO+2( $\beta$ )(0.52)   | Os(d $\pi$ ) $\rightarrow$ L <sub>2</sub> ( $\pi^*$ )                          |
| 491(0.04)                                         | HOMO-14( $\beta$ ) $\rightarrow$ LUMO( $\beta$ )(0.99)    | L <sub>2</sub> ( $\pi$ ) $\rightarrow$ Os(d $\pi$ )                            |
| 434(0.15)                                         | HOMO( $\beta$ ) $\rightarrow$ LUMO+7( $\beta$ )(0.67)     | Os(d $\pi$ )/L <sub>2</sub> ( $\pi$ ) $\rightarrow$ bpy( $\pi^*$ )             |
|                                                   | SOMO1( $\alpha$ ) $\rightarrow$ LUMO+5( $\alpha$ )(0.59)  | L <sub>2</sub> ( $\pi$ ) $\rightarrow$ bpy( $\pi^*$ )                          |
| 423(0.10)                                         | HOMO-4( $\beta$ ) $\rightarrow$ LUMO+7( $\beta$ )(0.55)   | L <sub>2</sub> ( $\pi$ )/Os(d $\pi$ ) $\rightarrow$ bpy( $\pi^*$ )             |
| 409(0.36)                                         | HOMO-22( $\beta$ ) $\rightarrow$ LUMO( $\beta$ )(0.63)    | L <sub>2</sub> ( $\pi$ )/bpy( $\pi$ ) $\rightarrow$ Os(d $\pi$ )               |
|                                                   | SOMO1( $\alpha$ ) $\rightarrow$ LUMO+5( $\alpha$ )(0.50)  | L <sub>2</sub> ( $\pi$ ) $\rightarrow$ bpy( $\pi^*$ )                          |
|                                                   | [3 <sup>3+</sup> ]( $S=1/2$ )                             |                                                                                |
| 1300(0.004)                                       | HOMO( $\beta$ ) $\rightarrow$ LUMO+2( $\beta$ )(0.98)     | Os(d $\pi$ ) $\rightarrow$ L <sub>2</sub> ( $\pi^*$ )                          |
| 1091(0.16)                                        | HOMO-6( $\beta$ ) $\rightarrow$ LUMO( $\beta$ )(0.98)     | L <sub>2</sub> ( $\pi$ ) $\rightarrow$ Os(d $\pi$ )/L <sub>2</sub> ( $\pi^*$ ) |
| 893(0.02)                                         | HOMO-3( $\beta$ ) $\rightarrow$ LUMO+1( $\beta$ )(0.90)   | Os(d $\pi$ )/bpy( $\pi$ ) $\rightarrow$ L <sub>2</sub> ( $\pi^*$ )             |
| 810(0.14)                                         | HOMO-5( $\alpha$ ) $\rightarrow$ LUMO( $\alpha$ )(0.84)   | Os(d $\pi$ )/bpy( $\pi$ ) $\rightarrow$ L <sub>2</sub> ( $\pi^*$ )             |
| 771(0.50)                                         | HOMO-1( $\alpha$ ) $\rightarrow$ LUMO( $\alpha$ )(0.56)   | Os(d $\pi$ ) $\rightarrow$ L <sub>2</sub> ( $\pi^*$ )                          |
|                                                   | HOMO-5( $\alpha$ ) $\rightarrow$ LUMO( $\alpha$ )(0.48)   | Os(d $\pi$ )/bpy( $\pi$ ) $\rightarrow$ L <sub>2</sub> ( $\pi^*$ )             |
| 595(0.05)                                         | HOMO-7( $\alpha$ ) $\rightarrow$ LUMO( $\alpha$ )(0.66)   | L <sub>2</sub> ( $\pi$ ) $\rightarrow$ L <sub>2</sub> ( $\pi^*$ )              |
|                                                   | HOMO-6( $\beta$ ) $\rightarrow$ LUMO+1( $\beta$ )(0.59)   | L <sub>2</sub> ( $\pi$ ) $\rightarrow$ L <sub>2</sub> ( $\pi^*$ )              |
| 476(0.06)                                         | HOMO-5( $\beta$ ) $\rightarrow$ LUMO+2( $\beta$ )(0.57)   | Os(d $\pi$ ) $\rightarrow$ bpy( $\pi^*$ )                                      |
|                                                   | HOMO-5( $\alpha$ ) $\rightarrow$ LUMO+2( $\alpha$ )(0.41) | Os(d $\pi$ )/bpy( $\pi$ ) $\rightarrow$ bpy( $\pi^*$ )                         |
| 381(0.05)                                         | SOMO1( $\alpha$ ) $\rightarrow$ LUMO+13( $\alpha$ )(0.91) | L <sub>2</sub> ( $\pi$ ) $\rightarrow$ L <sub>2</sub> ( $\pi^*$ )              |

|             |                                                            |                                                                          |
|-------------|------------------------------------------------------------|--------------------------------------------------------------------------|
| 375(0.40)   | SOMO1( $\alpha$ ) $\rightarrow$ LUMO+7( $\alpha$ )(0.42)   | $L_2(\pi)\rightarrow$ bpy( $\pi^*$ )                                     |
|             | HOMO-1( $\beta$ ) $\rightarrow$ LUMO+10( $\beta$ )(0.37)   | $Os(d\pi)/L_2(\pi)\rightarrow$ bpy( $\pi^*$ )                            |
|             | HOMO-1( $\alpha$ ) $\rightarrow$ LUMO+11( $\alpha$ )(0.31) | $Os(d\pi)\rightarrow$ bpy( $\pi^*$ )                                     |
|             | [ $3^{2+}$ ]( $S=0$ )                                      |                                                                          |
| 1165(0.003) | HOMO-1 $\rightarrow$ LUMO(0.69)                            | $Os(d\pi)\rightarrow$ L <sub>2</sub> ( $\pi^*$ )                         |
| 891(0.10)   | HOMO-4 $\rightarrow$ LUMO(0.58)                            | $Os(d\pi)/bpy(\pi)\rightarrow$ L <sub>2</sub> ( $\pi^*$ )                |
| 816(0.51)   | HOMO-4 $\rightarrow$ LUMO(0.40)                            | $Os(d\pi)/bpy(\pi)\rightarrow$ L <sub>2</sub> ( $\pi^*$ )                |
|             | HOMO-2 $\rightarrow$ LUMO(0.55)                            | $Os(d\pi)\rightarrow$ L <sub>2</sub> ( $\pi^*$ )                         |
| 665(0.01)   | HOMO-1 $\rightarrow$ LUMO+2(0.69)                          | $Os(d\pi)/bpy(\pi)\rightarrow$ bpy( $\pi^*$ )                            |
| 488(0.10)   | HOMO-6 $\rightarrow$ LUMO+4(0.62)                          | $Os(d\pi)\rightarrow$ bpy( $\pi^*$ )                                     |
| 470(0.03)   | HOMO-1 $\rightarrow$ LUMO+6(0.65)                          | $Os(d\pi)\rightarrow$ bpy( $\pi^*$ )                                     |
|             | HOMO $\rightarrow$ LUMO+5(0.22)                            | $L_2(\pi)\rightarrow$ bpy( $\pi^*$ )                                     |
| 441(0.02)   | HOMO-1 $\rightarrow$ LUMO+7(0.47)                          | $Os(d\pi)\rightarrow$ bpy( $\pi^*$ )                                     |
|             | HOMO $\rightarrow$ LUMO+9(0.35)                            | $L_2(\pi)\rightarrow$ bpy( $\pi^*$ )                                     |
| 367(0.09)   | HOMO-5 $\rightarrow$ LUMO+13(0.31)                         | $Os(d\pi)/bpy(\pi)\rightarrow$ L <sub>2</sub> ( $\pi^*$ )                |
|             | HOMO-3 $\rightarrow$ LUMO+13(0.47)                         | $Os(d\pi)/L_2(\pi)\rightarrow$ L <sub>2</sub> ( $\pi^*$ )                |
|             | [ $3^+$ ]( $S=1/2$ )                                       |                                                                          |
| 1687(0.005) | HOMO( $\alpha$ ) $\rightarrow$ LUMO( $\alpha$ )(0.99)      | $L_2(\pi)/bpy(\pi)\rightarrow$ bpy( $\pi^*$ )                            |
| 1572(0.01)  | HOMO( $\alpha$ ) $\rightarrow$ LUMO+2( $\alpha$ )(0.99)    | $L_2(\pi)/bpy(\pi)\rightarrow$ bpy( $\pi^*$ )                            |
| 910(0.03)   | HOMO-1( $\beta$ ) $\rightarrow$ LUMO( $\beta$ )(0.99)      | $Os(d\pi)\rightarrow$ bpy( $\pi^*$ )                                     |
| 792(0.15)   | HOMO-2( $\beta$ ) $\rightarrow$ LUMO( $\beta$ )(0.93)      | $Os(d\pi)\rightarrow$ bpy( $\pi^*$ )                                     |
| 699(0.02)   | HOMO-4( $\beta$ ) $\rightarrow$ LUMO( $\beta$ )(0.61)      | $Os(d\pi)/bpy(\pi)\rightarrow$ bpy( $\pi^*$ )                            |
|             | HOMO-1( $\beta$ ) $\rightarrow$ LUMO+4( $\beta$ )(0.47)    | $Os(d\pi)\rightarrow$ L <sub>2</sub> ( $\pi^*$ )/bpy( $\pi^*$ )          |
|             | HOMO-2( $\alpha$ ) $\rightarrow$ LUMO+3( $\alpha$ )(0.35)  | $Os(d\pi)\rightarrow$ bpy( $\pi^*$ )/L <sub>2</sub> ( $\pi^*$ )          |
| 645(0.02)   | HOMO-3( $\alpha$ ) $\rightarrow$ LUMO+3( $\alpha$ )(0.58)  | $Os(d\pi)\rightarrow$ bpy( $\pi^*$ )/L <sub>2</sub> ( $\pi^*$ )          |
|             | HOMO-2( $\beta$ ) $\rightarrow$ LUMO+2( $\beta$ )(0.55)    | $Os(d\pi)\rightarrow$ bpy( $\pi^*$ )                                     |
| 608(0.11)   | HOMO( $\alpha$ ) $\rightarrow$ LUMO+12( $\alpha$ )(0.76)   | $L_2(\pi)/bpy(\pi)\rightarrow$ L <sub>2</sub> ( $\pi^*$ )                |
|             | HOMO-2( $\beta$ ) $\rightarrow$ LUMO+4( $\beta$ )(0.41)    | $Os(d\pi)\rightarrow$ L <sub>2</sub> ( $\pi^*$ )                         |
| 548(0.03)   | HOMO-7( $\alpha$ ) $\rightarrow$ LUMO+2( $\alpha$ )(0.66)  | $Os(d\pi)/bpy(\pi)\rightarrow$ bpy( $\pi^*$ )                            |
|             | HOMO-7( $\alpha$ ) $\rightarrow$ LUMO( $\alpha$ )(0.32)    | $Os(d\pi)/bpy(\pi)\rightarrow$ bpy( $\pi^*$ )                            |
|             | HOMO-5( $\alpha$ ) $\rightarrow$ LUMO+3( $\alpha$ )(0.31)  | $Os(d\pi)/bpy(\pi)\rightarrow$ bpy( $\pi^*$ )/L <sub>2</sub> ( $\pi^*$ ) |

|             |                                                           |                                                                                               |
|-------------|-----------------------------------------------------------|-----------------------------------------------------------------------------------------------|
| 522(0.09)   | HOMO-7( $\alpha$ ) $\rightarrow$ LUMO+2( $\alpha$ )(0.59) | Os(d $\pi$ )/bpy( $\pi$ ) $\rightarrow$ bpy( $\pi^*$ )                                        |
| 508(0.05)   | HOMO-2( $\alpha$ ) $\rightarrow$ LUMO+5( $\alpha$ )(0.72) | Os(d $\pi$ ) $\rightarrow$ bpy( $\pi^*$ )                                                     |
|             | HOMO-1( $\beta$ ) $\rightarrow$ LUMO+6( $\beta$ )(0.46)   | Os(d $\pi$ ) $\rightarrow$ bpy( $\pi^*$ )                                                     |
| 462(0.05)   | HOMO-2( $\beta$ ) $\rightarrow$ LUMO+7( $\beta$ )(0.53)   | Os(d $\pi$ ) $\rightarrow$ bpy( $\pi^*$ )                                                     |
|             | HOMO-1( $\beta$ ) $\rightarrow$ LUMO+10( $\beta$ )(0.42)  | Os(d $\pi$ ) $\rightarrow$ bpy( $\pi^*$ )                                                     |
|             | HOMO-2( $\alpha$ ) $\rightarrow$ LUMO+9( $\alpha$ )(0.39) | Os(d $\pi$ ) $\rightarrow$ bpy( $\pi^*$ )                                                     |
| 443(0.03)   | HOMO-3( $\alpha$ ) $\rightarrow$ LUMO+6( $\alpha$ )(0.59) | Os(d $\pi$ ) $\rightarrow$ bpy( $\pi^*$ )                                                     |
|             | HOMO-2( $\beta$ ) $\rightarrow$ LUMO+7( $\beta$ )(0.53)   | Os(d $\pi$ ) $\rightarrow$ bpy( $\pi^*$ )                                                     |
|             | [3] ( $S=0$ )                                             |                                                                                               |
| 2145(0.26)  | HOMO $\rightarrow$ LUMO(0.52)                             | bpy( $\pi$ )/L <sub>2</sub> ( $\pi$ ) $\rightarrow$ bpy( $\pi^*$ )                            |
|             | HOMO $\rightarrow$ LUMO+2(0.46)                           | bpy( $\pi$ )/L <sub>2</sub> ( $\pi$ ) $\rightarrow$ bpy( $\pi^*$ )                            |
| 1641(0.003) | HOMO $\rightarrow$ LUMO+3(0.69)                           | bpy( $\pi$ )/L <sub>2</sub> ( $\pi$ ) $\rightarrow$ bpy( $\pi^*$ )/L <sub>2</sub> ( $\pi^*$ ) |
| 893(0.01)   | HOMO $\rightarrow$ LUMO+8(0.70)                           | bpy( $\pi$ )/L <sub>2</sub> ( $\pi$ ) $\rightarrow$ bpy( $\pi^*$ )                            |
| 826(0.02)   | HOMO $\rightarrow$ LUMO+10(0.70)                          | bpy( $\pi$ )/L <sub>2</sub> ( $\pi$ ) $\rightarrow$ bpy( $\pi^*$ )                            |
| 673(0.02)   | HOMO-4 $\rightarrow$ LUMO+1(0.61)                         | Os(d $\pi$ )/bpy( $\pi$ ) $\rightarrow$ bpy( $\pi^*$ )                                        |
| 624(0.07)   | HOMO-4 $\rightarrow$ LUMO+3(0.60)                         | Os(d $\pi$ )/bpy( $\pi$ ) $\rightarrow$ bpy( $\pi^*$ )/L <sub>2</sub> ( $\pi^*$ )             |
| 534(0.09)   | HOMO-7 $\rightarrow$ LUMO+2(0.38)                         | Os(d $\pi$ )/bpy( $\pi$ ) $\rightarrow$ bpy( $\pi^*$ )                                        |
| 413(0.15)   | HOMO-5 $\rightarrow$ LUMO+5(0.30)                         | Os(d $\pi$ )/bpy( $\pi$ ) $\rightarrow$ bpy( $\pi^*$ )                                        |
| 380(0.38)   | HOMO-3 $\rightarrow$ LUMO+12(0.34)                        | Os(d $\pi$ )/L <sub>2</sub> ( $\pi$ ) $\rightarrow$ L <sub>2</sub> ( $\pi^*$ )                |
| 361(0.21)   | HOMO-6 $\rightarrow$ LUMO+12(0.51)                        | Os(d $\pi$ )/bpy( $\pi$ ) $\rightarrow$ L <sub>2</sub> ( $\pi^*$ )                            |
|             | [3 <sup>-</sup> ] ( $S=1/2$ )                             |                                                                                               |
| 1653(0.02)  | HOMO( $\beta$ ) $\rightarrow$ LUMO+2( $\beta$ )(0.86)     | L <sub>2</sub> ( $\pi$ )/bpy( $\pi$ ) $\rightarrow$ bpy( $\pi^*$ )                            |
| 977(0.009)  | HOMO( $\alpha$ ) $\rightarrow$ LUMO+7( $\alpha$ )(0.62)   | bpy( $\pi$ ) $\rightarrow$ bpy( $\pi^*$ )                                                     |
|             | HOMO( $\alpha$ ) $\rightarrow$ LUMO+8( $\alpha$ )(0.61)   | bpy( $\pi$ ) $\rightarrow$ bpy( $\pi^*$ )                                                     |
|             | HOMO( $\alpha$ ) $\rightarrow$ LUMO+6( $\alpha$ )(0.44)   | bpy( $\pi$ ) $\rightarrow$ bpy( $\pi^*$ )                                                     |
| 876(0.02)   | HOMO-2( $\alpha$ ) $\rightarrow$ LUMO( $\alpha$ )(0.74)   | Os(d $\pi$ )/L <sub>2</sub> ( $\pi$ ) $\rightarrow$ bpy( $\pi^*$ )                            |
| 754(0.05)   | HOMO-3( $\beta$ ) $\rightarrow$ LUMO+1( $\beta$ )(0.48)   | L <sub>2</sub> ( $\pi$ ) $\rightarrow$ bpy( $\pi^*$ )                                         |
|             | HOMO-1( $\beta$ ) $\rightarrow$ LUMO+1( $\beta$ )(0.39)   | Os(d $\pi$ )/L <sub>2</sub> ( $\pi$ ) $\rightarrow$ bpy( $\pi^*$ )                            |
| 692(0.05)   | HOMO-5( $\alpha$ ) $\rightarrow$ LUMO+2( $\alpha$ )(0.47) | Os(d $\pi$ )/bpy( $\pi$ )/L <sub>2</sub> ( $\pi$ ) $\rightarrow$ bpy( $\pi^*$ )               |
| 570(0.09)   | HOMO-5( $\beta$ ) $\rightarrow$ LUMO+1( $\beta$ )(0.49)   | Os(d $\pi$ )/bpy( $\pi$ ) $\rightarrow$ bpy( $\pi^*$ )                                        |
| 437(0.04)   | HOMO-2( $\beta$ ) $\rightarrow$ LUMO+12( $\beta$ )(0.40)  | Os(d $\pi$ )/bpy( $\pi$ ) $\rightarrow$ L <sub>2</sub> ( $\pi^*$ )                            |

|            | [3 <sup>2-</sup> ] (S=0) |                                                                    |
|------------|--------------------------|--------------------------------------------------------------------|
| 1515(0.14) | HOMO-1→LUMO+1(0.53)      | bpy( $\pi$ )/L <sub>2</sub> ( $\pi$ )→bpy( $\pi^*$ )               |
|            | HOMO→LUMO+2(0.50)        | bpy( $\pi$ )→bpy( $\pi^*$ )/L <sub>2</sub> ( $\pi^*$ )             |
| 840(0.03)  | HOMO-2→LUMO(0.47)        | Os(d $\pi$ )→bpy( $\pi^*$ )                                        |
| 730(0.14)  | HOMO-4→LUMO(0.58)        | Os(d $\pi$ )/bpy( $\pi$ )→bpy( $\pi^*$ )                           |
| 616(0.08)  | HOMO-6→LUMO(0.63)        | Os(d $\pi$ )/bpy( $\pi$ )→bpy( $\pi^*$ )                           |
| 553(0.04)  | HOMO-7→LUMO+1(0.60)      | Os(d $\pi$ )/bpy( $\pi$ )→bpy( $\pi^*$ )                           |
| 427(0.12)  | HOMO-1→LUMO+15(0.41)     | bpy( $\pi$ )/L <sub>2</sub> ( $\pi$ )→bpy( $\pi^*$ )               |
| 383(0.51)  | HOMO-9→LUMO+2(0.41)      | L <sub>2</sub> ( $\pi$ )→bpy( $\pi^*$ )/L <sub>2</sub> ( $\pi^*$ ) |
| 342(0.15)  | HOMO-6→LUMO+14(0.36)     | Os(d $\pi$ )/bpy( $\pi$ )→L <sub>2</sub> ( $\pi^*$ )               |
|            | HOMO-1→LUMO+21(0.34)     | bpy( $\pi$ )/L <sub>2</sub> ( $\pi$ )→L <sub>2</sub> ( $\pi^*$ )   |

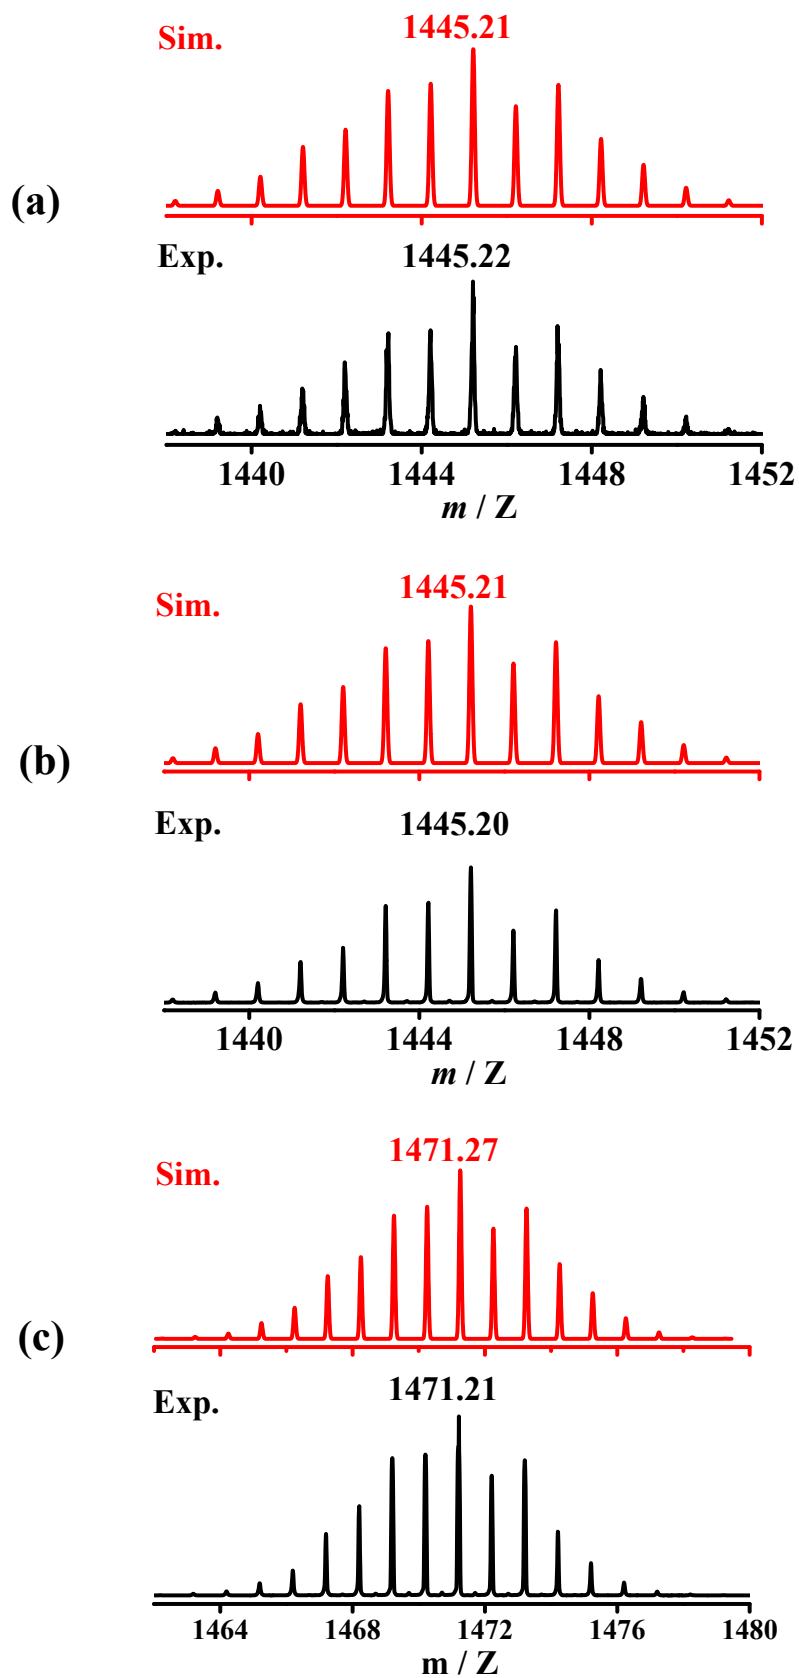

**Fig. S1** ESI(+) mass spectra of (a)  $\{[1](\text{ClO}_4)_2-\text{ClO}_4\}^+$ , (b)  $\{[2](\text{ClO}_4)_2-\text{ClO}_4\}^+$ , and (c)  $\{[3](\text{ClO}_4)_2-\text{ClO}_4\}^+$  in  $\text{CH}_3\text{CN}$ .

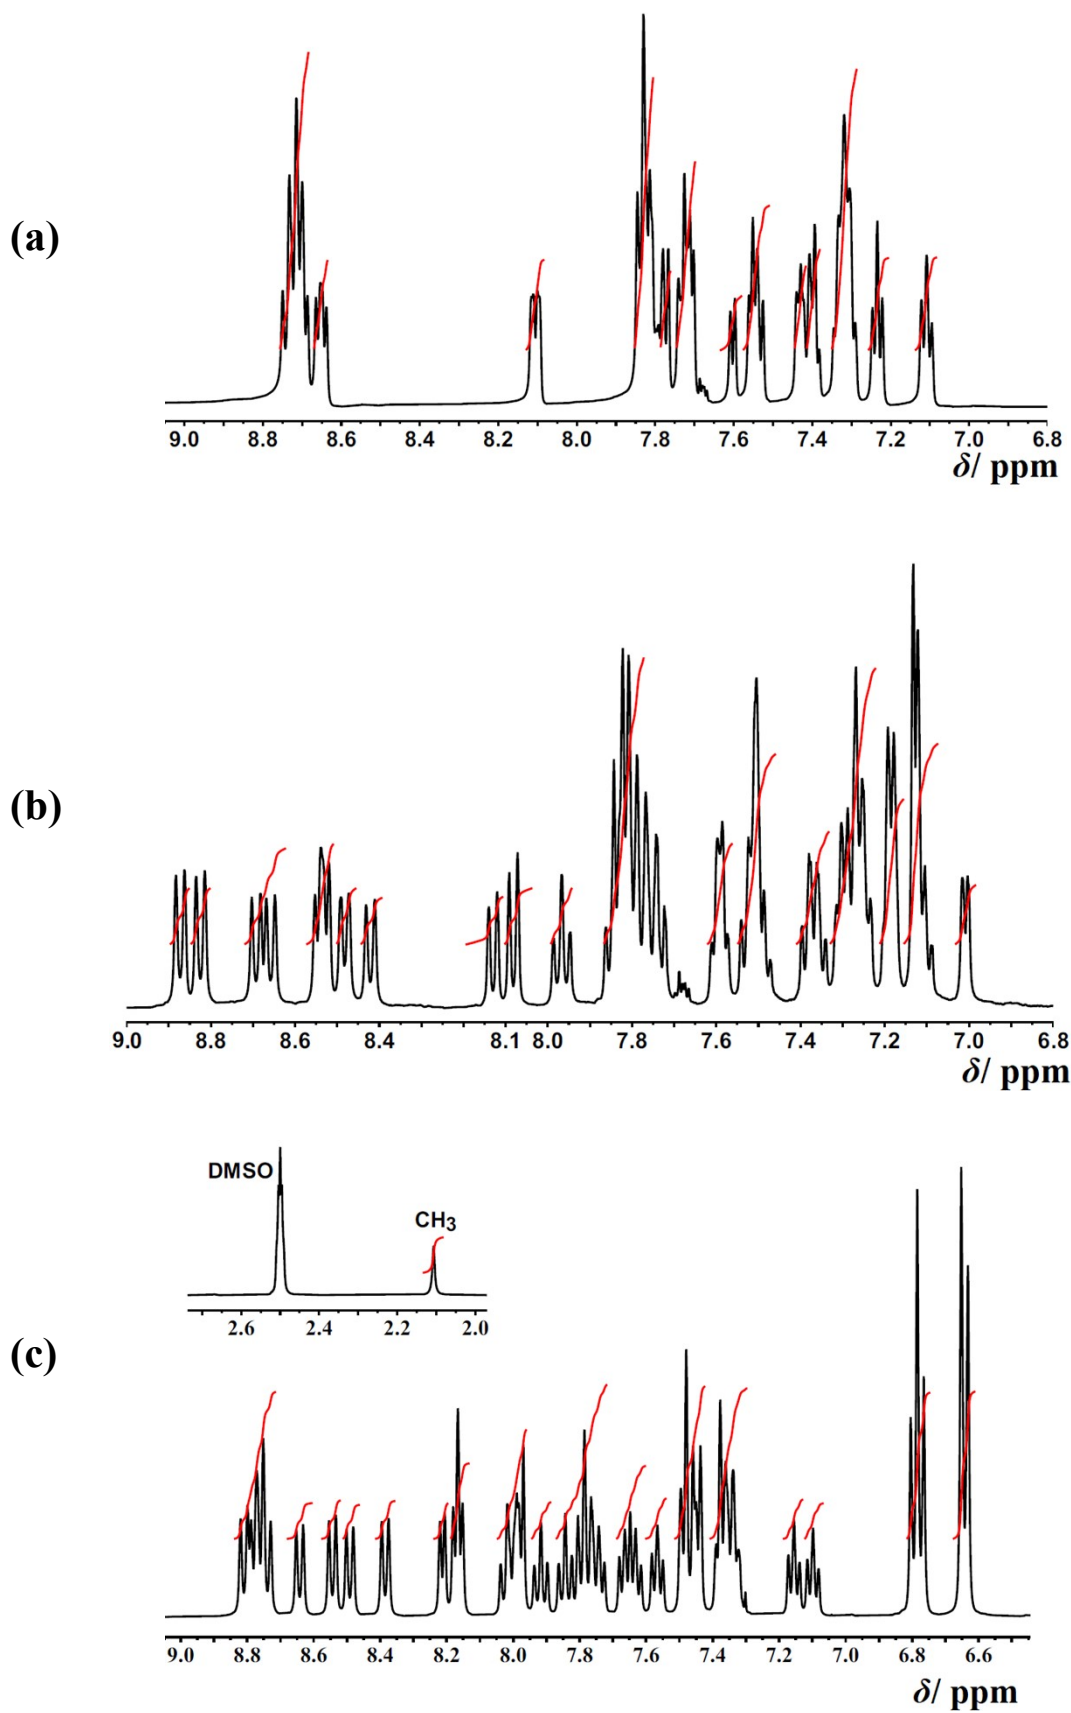

**Fig. S2**  $^1\text{H}$  NMR spectra of (a)  $[\mathbf{1}](\text{ClO}_4)_2$ , (b)  $[\mathbf{2}](\text{ClO}_4)_2$  and (c)  $[\mathbf{3}](\text{ClO}_4)_2$  in  $(\text{CD}_3)_2\text{SO}$ .

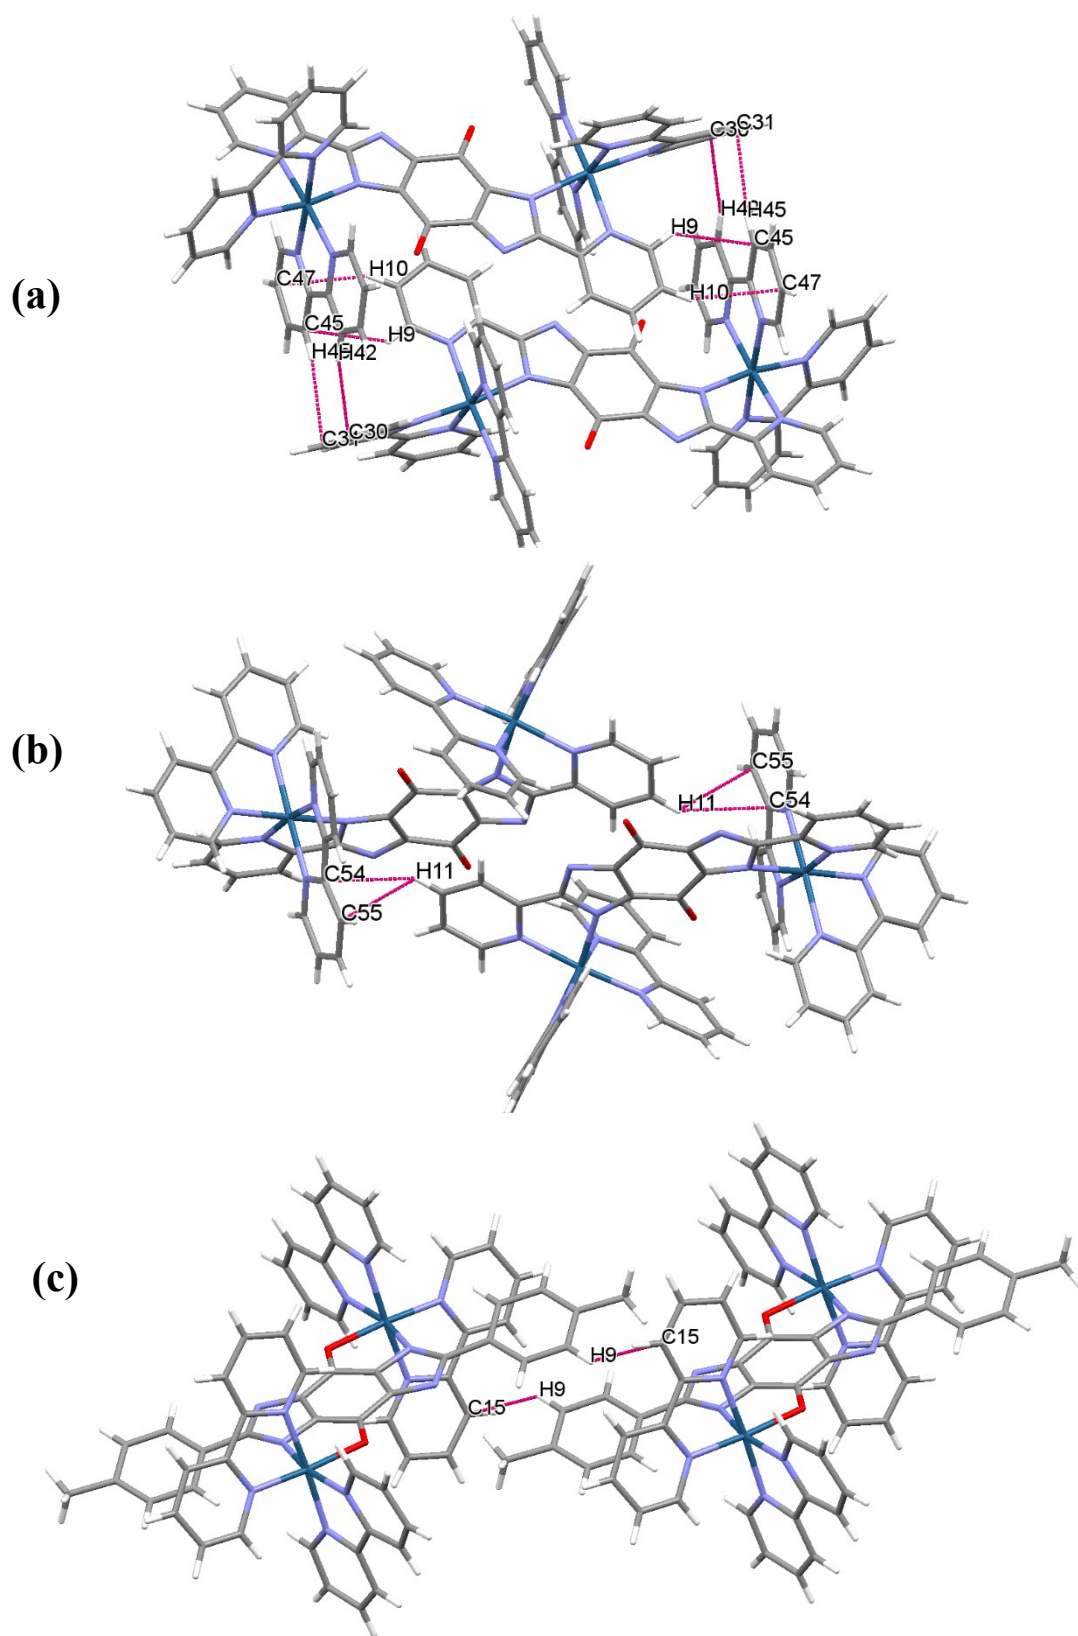

**Fig. S3** Intermolecular CH--- $\pi$  interactions in (a)  $[1](ClO_4)_2$ , (b)  $[2](ClO_4)_2$  and (c)  $[3](ClO_4)_2$ .



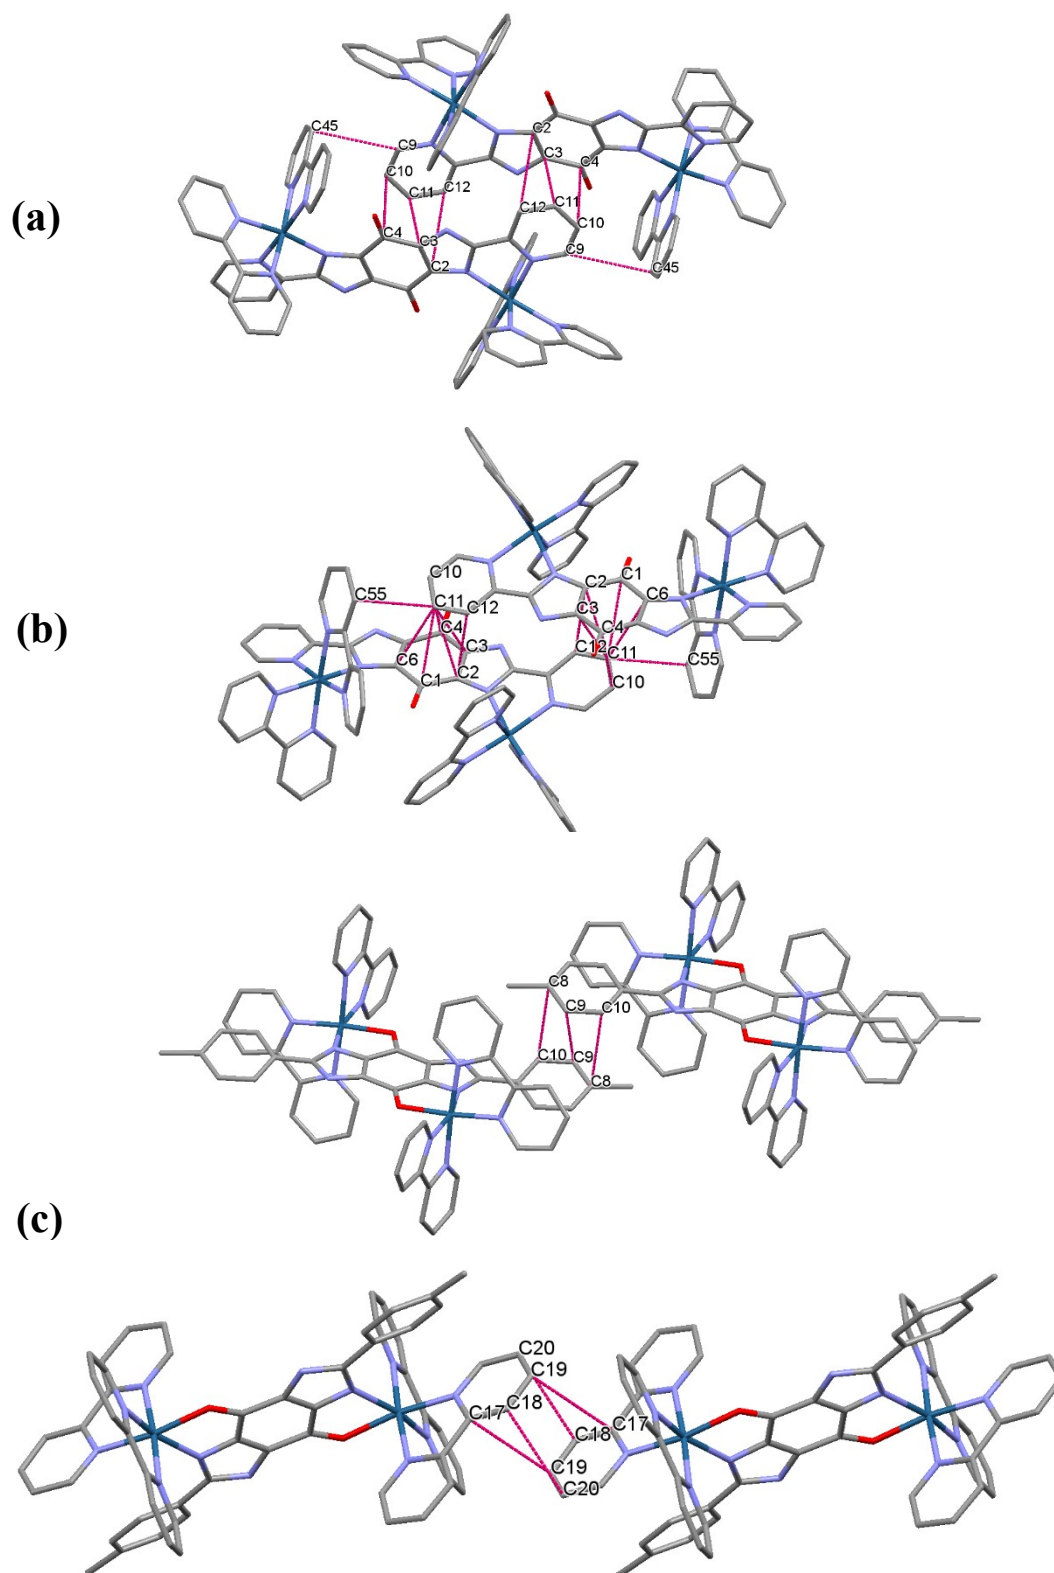

**Fig. S4** Intermolecular  $\pi$ --- $\pi$  interactions in (a)  $[1](\text{ClO}_4)_2$ , (b)  $[2](\text{ClO}_4)_2$  and (c)  $[3](\text{ClO}_4)_2$ .

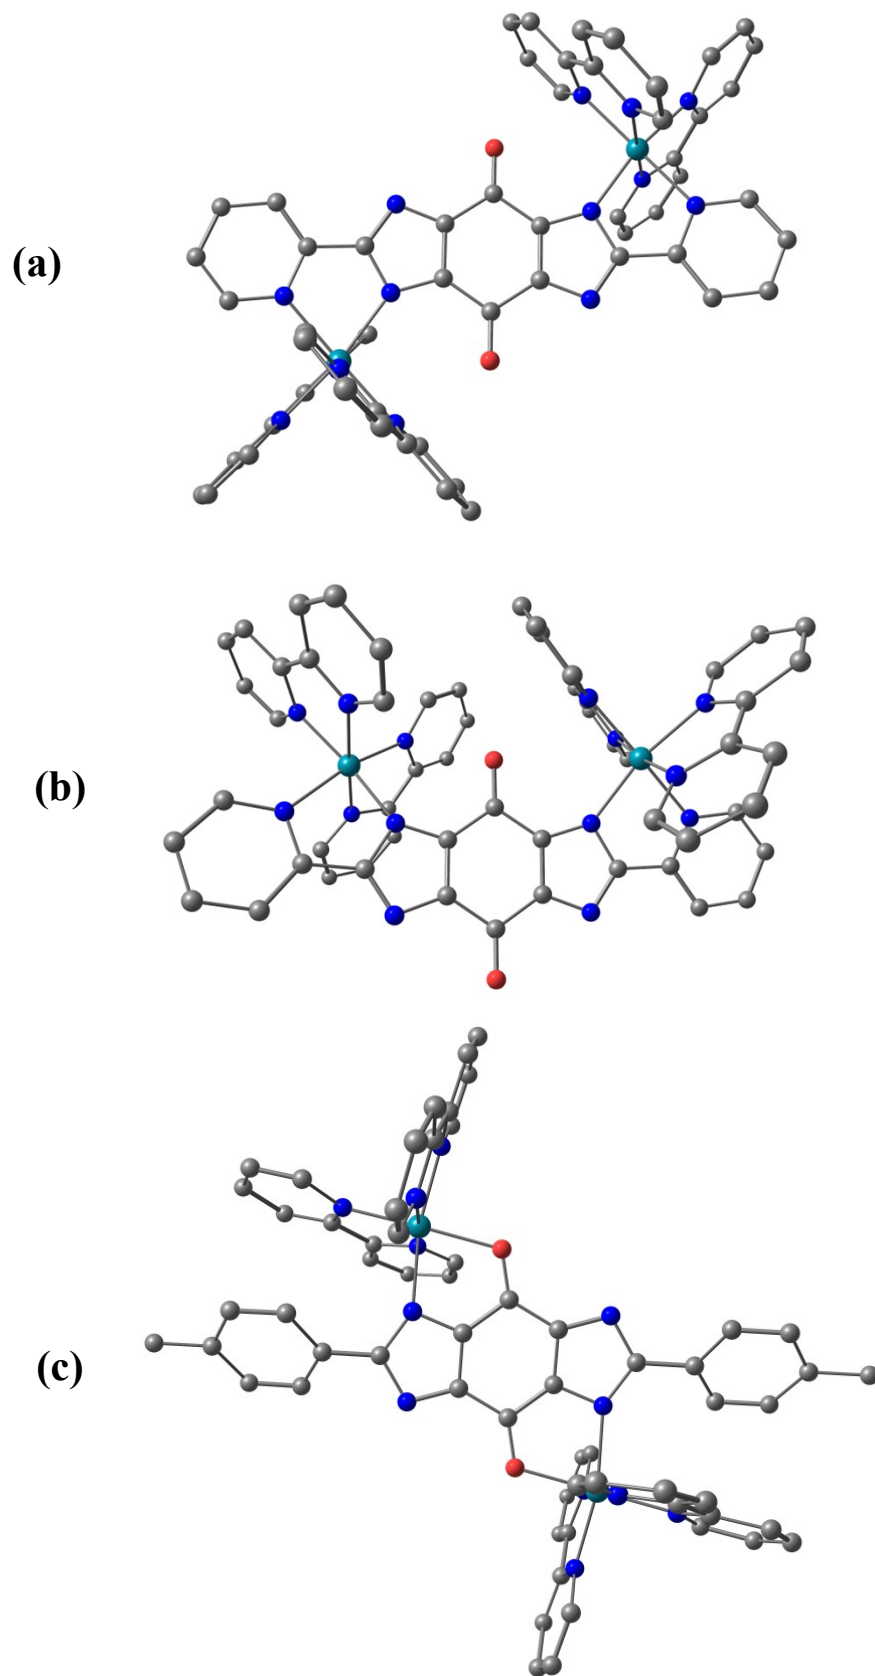

**Fig. S5** DFT (M06L/LanL2DZ/6-31G\*\*) optimized structures of (a)  $[1^{2+}]$  ( $S=0$ ), (b)  $[2^{2+}]$  ( $S=0$ ) and (c)  $[3^{2+}]$  ( $S=0$ ).

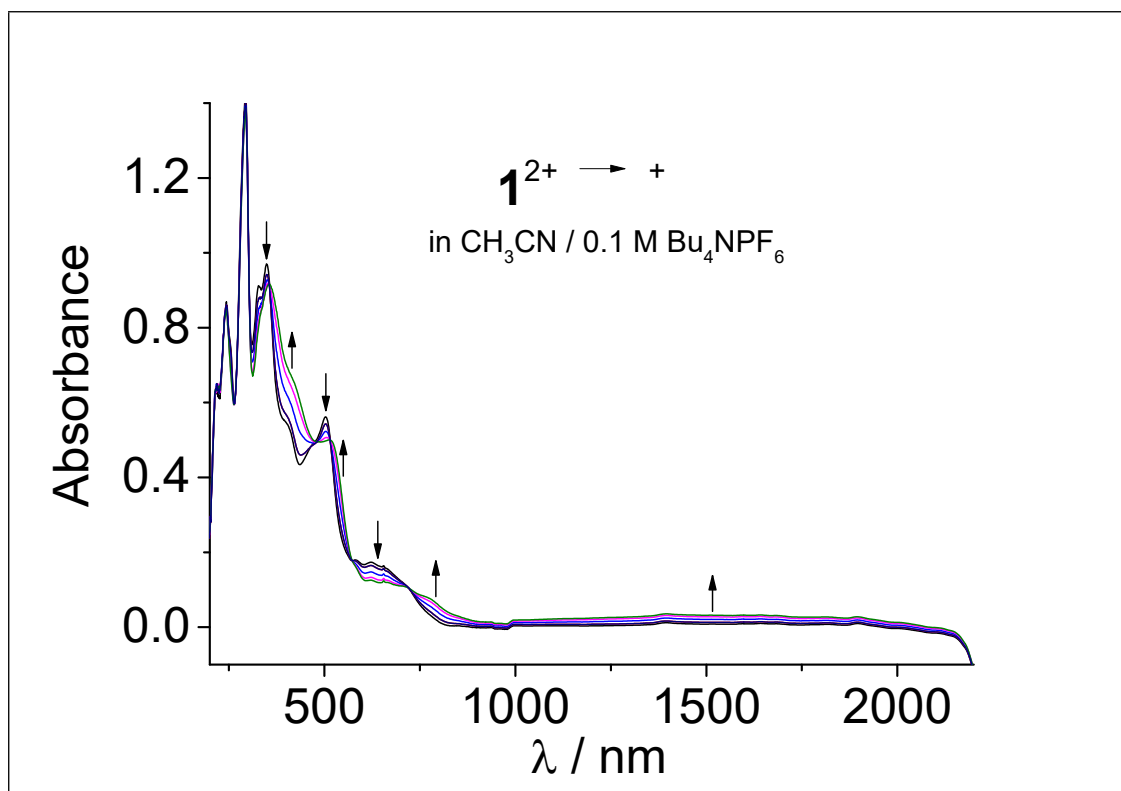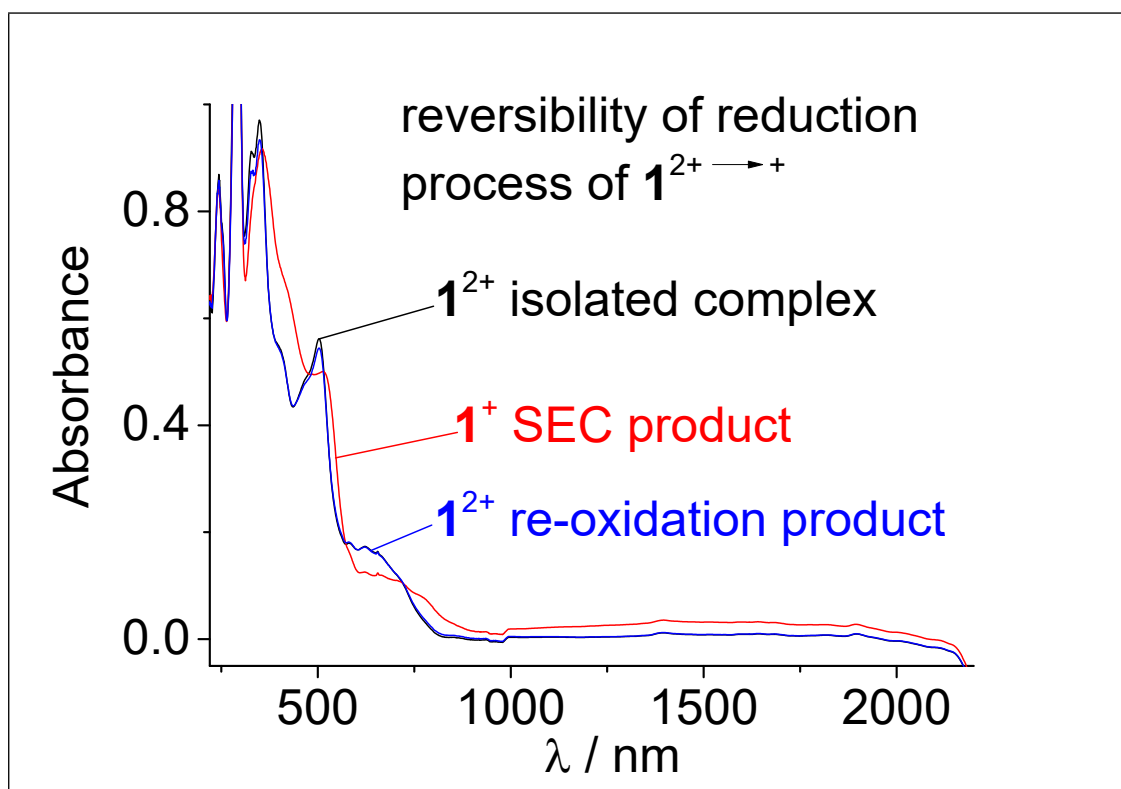

**Fig. S6** UV-vis-NIR spectroelectrochemical response of  $[\mathbf{1}](\text{ClO}_4)_2$  on reduction.

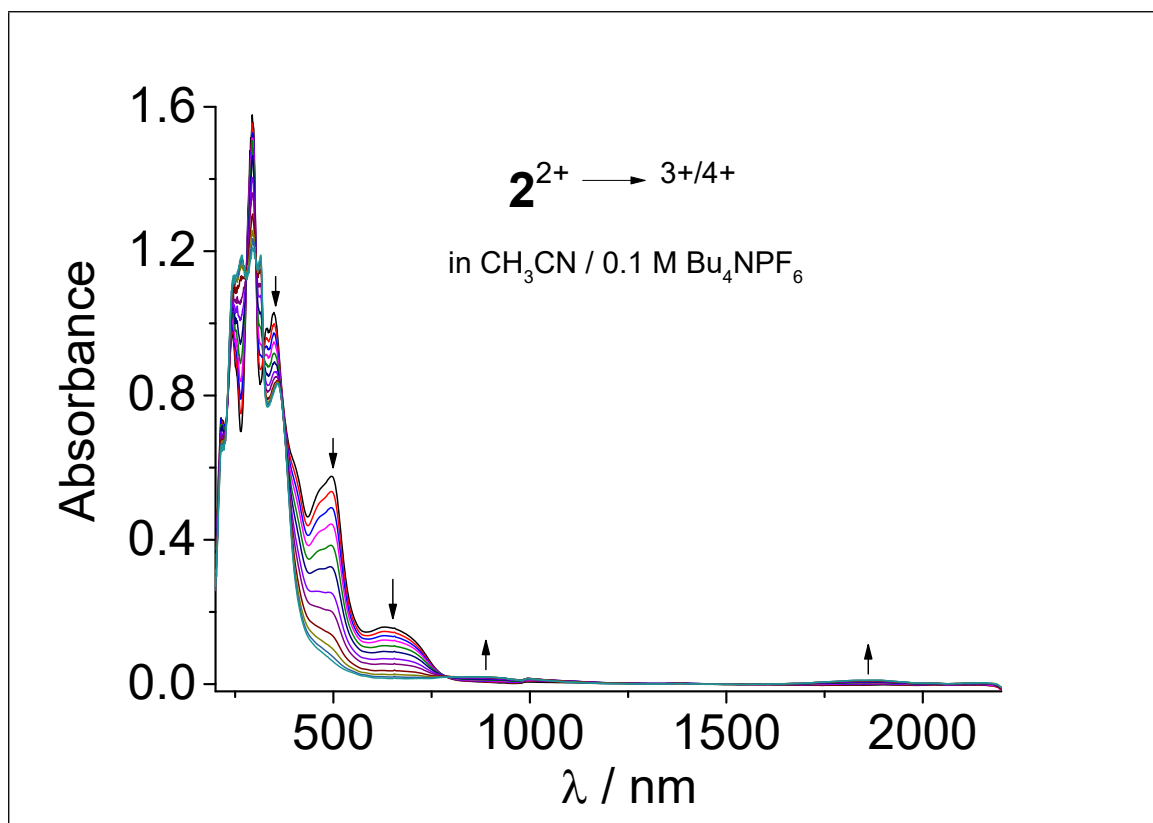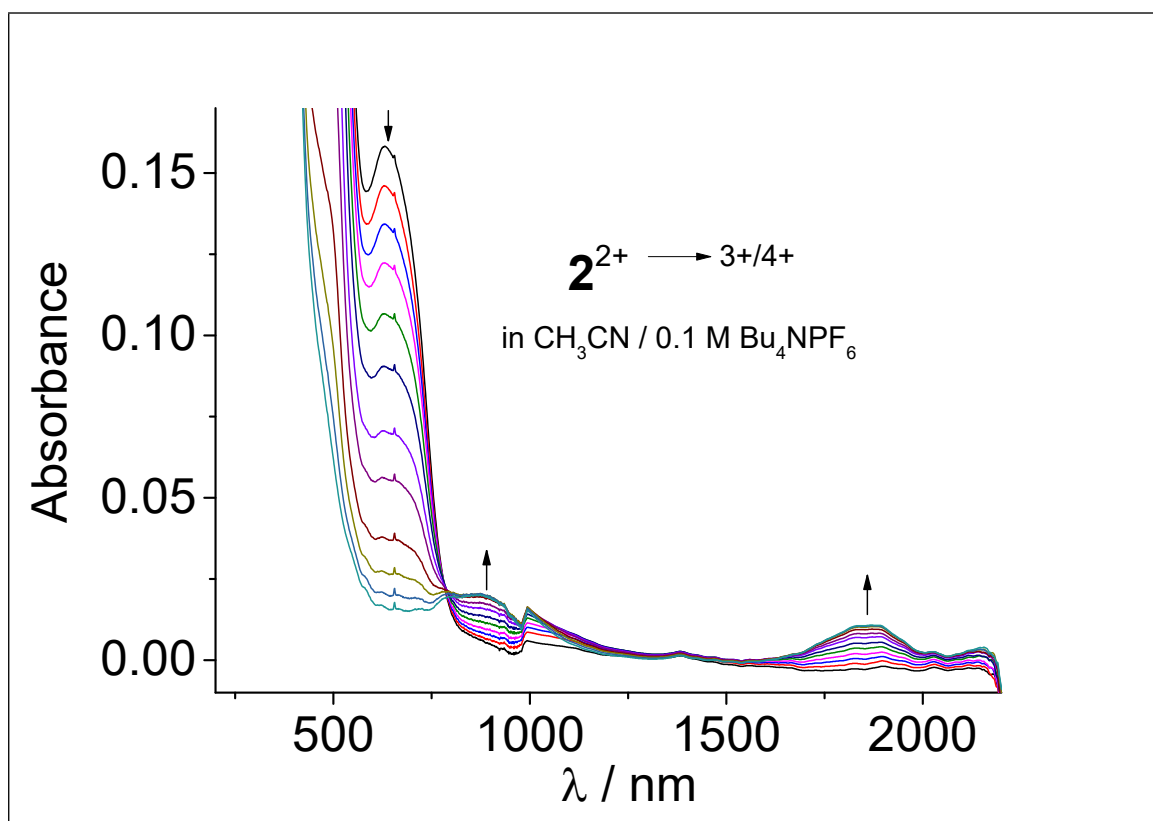

Fig. S7 UV-vis-NIR spectroelectrochemical response of  $[\mathbf{2}](\text{ClO}_4)_2$  on oxidation.
